# Supplementary material for: A taxonomic synopsis of Virola (Myristicaceae) in Mesoamerica, including six new species
Source: PhytoKeys. 2019 Oct 23;134:1–82. doi: 10.3897/phytokeys.134.37979 (PMC6821834; doi:10.3897/phytokeys.134.37979)
Supplement: Supplementary material 1 [file phytokeys-134-001-s001.xlsx]

## Sheet: Hoja1
Collector	Collection Number	Type	Name	Full Name	Genus	Species	Family	Region	Country	Upper Name	Lower Name	Locality	Elevation Display	Minimum Elevation	Maximum Elevation	Elevation Unit	Coordinate Display	LatitudeDecimal	LongitudeDecimal	Date Display	Minimum Day	Minimum Month	Minimum Year	Maximum Day	Maximum Month	Maximum Year	Description	Institutions	Determination Year	Determination By	Determination Qualifier
L. Acosta, V. H. Ramírez, G. Soto, G. Sancho	1389		Virola alleni	Virola alleni D. Santam. & Aguilar	Virola	alleni	Myristicaceae	Mesoamerica	Costa Rica	Puntarenas	Golfito	Península de Osa. P.N. Corcovado. Estación Agujas. Colecta alrededores de la Estación Agujas.	0 - 700 m	0	700	m		8.53661	-83.4255	2000-05-22	22	5	2000				Árbol de 18 m X 30 cm DAP; escaso en dosel medio. Estéril.	CR	2018	D. Santamaría-Aguilar
P. H. Allen	5763	Type of Virola alleni	Virola alleni	Virola alleni D. Santam. & Aguilar	Virola	alleni	Myristicaceae	Mesoamerica	Costa Rica	Puntarenas		Esquinas forest preserve	0 m	0		m				10-jan-1951	10	1	1951				Tree 75 ft., flowers tan, infrequent in heavy forest.	F-2 sheets, USJ	2018	D. Santamaría-Aguilar
Á. Fernández	410		Virola alleni	Virola alleni D. Santam. & Aguilar	Virola	alleni	Myristicaceae	Mesoamerica	Costa Rica	Puntarenas	Osa	R. F. Golfo Dulce. Península de Osa; Fila Casa Loma. Aguabuena Sur. La Cuenca.	50 - 150 m	50	150	m	08°42'20"N 083°31'30"W	8.70556	-83.525	1992-10-07	7	10	1992				Árbol. Frutos verdes con pubescencia dorada muy densa.	CR, MO	2018	D. Santamaría-Aguilar
R. Aguilar	2224		Virola alleni	Virola alleni D. Santam. & Aguilar	Virola	alleni	Myristicaceae	Mesoamerica	Costa Rica	Puntarenas	Golfito	P.N. Corcovado. Península de Osa. Estación Los Patos.	200 m	200		m	08°34'00"N 083°31'00"W	8.56667	-83.5167	1993-09-02	2	9	1993				Árbol de 18 m × 25 cm DAP. Fuste cilíndrico. Savia rojiza, muy abundante. Frutos verdes con una pubescencia ferrugínea que se desprende fácilmente.	CR-2 sheets, LSU, MO	2018	D. Santamaría-Aguilar
N. Zamora, I. Chacón & G. Herrera	1440		Virola alleni	Virola alleni D. Santam. & Aguilar	Virola	alleni	Myristicaceae	Mesoamerica	Costa Rica	San José	Tarrazú	Esquipulas. Base del Cerro San Isidro, alrededores del Río Naranjo.	400 m	400		m	09°31'N 084°02'W	9.51667	-84.0333	1987-08-28	28	8	1987				Árbol de 30 m × 35 cm DAP. Tronco derecho, cilíndrico, liso, pardo-oscuro. Ramas largas, horizontales o más o menos arqueadas. Frutos abundantes.	CR, MO	2018	D. Santamaría-Aguilar
R. Aguilar	4735		Virola alleni	Virola alleni D. Santam. & Aguilar	Virola	alleni	Myristicaceae	Mesoamerica	Costa Rica	Puntarenas	Osa	R.F. Golfo Dulce. Cuenca Térraba-Sierpe. Bahía Chal, La Parcela.	150 m	150		m	08°43'50"N 083°27'17"W	8.73056	-83.4547	12-dec-1996	12	12	1996				Árbol de 27 m × 15 cm DAP. Estéril.	CR, MO	2018	D. Santamaría-Aguilar
K. Thomsen	857		Virola alleni	Virola alleni D. Santam. & Aguilar	Virola	alleni	Myristicaceae	Mesoamerica	Costa Rica	Puntarenas	Osa	Osa Peninsula. Aguabuena, 3 km W of Rincón. One-hectare permanent sample plot 800 m N of the house of Henry Monge in well-drained, moderately sloping terrain. Tall forest along timber road, left after selective logging March 1992. Characteristic species: Iriartea, Symphonia, Otoba, and Protium spp; Plot indiv. #3061	130 m	130		m	08°42'00"N 083°30'00"W	8.7	-83.5	1993-04-15	15	4	1993				DBH 26.1 cm	CR, MO, NY	2018	D. Santamaría-Aguilar
R. Aguilar	511		Virola alleni	Virola alleni D. Santam. & Aguilar	Virola	alleni	Myristicaceae	Mesoamerica	Costa Rica	Puntarenas	Golfito	Piro. Jiménez.	100 m	100		m	08°25'00"N 083°20'35"W	8.41667	-83.3431	1991-10-14	14	10	1991				Arbol de 20 m x 12 cm DAP. Infértil.	CR	2018	D. Santamaría-Aguilar
K. Thomsen	1284		Virola alleni	Virola alleni D. Santam. & Aguilar	Virola	alleni	Myristicaceae	Mesoamerica	Costa Rica	Puntarenas		Agua Buena, 2.5 km W of Rincón	150 m	150		m	08°42'00"N 083°30'00"W			1995-03-10	10	3	1995				Tree some 20 m x 30 cm. Flower yellow, fragrant.	NO, NY	2018	D. Santamaría-Aguilar
K. Thomsen	476		Virola alleni	Virola alleni D. Santam. & Aguilar	Virola	alleni	Myristicaceae	Mesoamerica	Costa Rica	PUntarenas		Agua Buena, 3.5 km W of Rincón	350 m	350		m	08°43'N 083°31'W			1993-06-14	14	6	1993				DBH 10.4 cm,	CR	2018	D. Santamaría-Aguilar
K. Thomsen	1049		Virola alleni	Virola alleni D. Santam. & Aguilar	Virola	alleni	Myristicaceae	Mesoamerica	Costa Rica	Puntarenas		Agua Buena, 3.5 km W of Rincón	150 m	150		m	08°42'00"N 083°31'00"W			1994-10-06	6	10	1994				Tree some 20 m x 25 cm. Bark with strong, spicy smell. Fruits reddish brown	CR	2018	D. Santamaría-Aguilar
K. Thomsen	915		Virola alleni	Virola alleni D. Santam. & Aguilar	Virola	alleni	Myristicaceae	Mesoamerica	COsta Rica	Puntarenas		Agua Buena, 3 km W of Rincón	130 m	130		m	08°42'N 083°30'W			1993-05-05	5	5	1993				DBH 25.5 cm. Sterile collection.	CR	2018	D. Santamaría-Aguilar
P. Harmon	291		Virola alleni	Virola alleni D. Santam. & Aguilar	Virola	alleni	Myristicaceae	Mesoamerica	Costa Rica	Puntarenas	Osa	R. F. Golfo Dulce. Península de Osa. Playa Campanario o San Josecito	1 - 10 m	1	10	m	08°39'39"N 083°42'50"W			1991-12-29	19	12	1991				Small tree, 15 x20 cm dbh. Monopodial straight, cylindrical and smooth-barked, trunk bearing long, drooping branches with axilary flower panicles. Flowers are yellow and minute.	CR-2 sheets	2018	D. Santamaría-Aguilar
L. J. Poveda	887		Virola alleni	Virola alleni D. Santam. & Aguilar	Virola	alleni	Myristicaceae	Mesoamerica	Costa Rica	Puntarenas	Golfito	Montaña aledaña al de aterrizaje	NA							1974-06-07	7	6	1974				Arbol 8 m x 15 DAP. Fuste cilíndrico, muy bien formado, savia acuosa-opaca.	CR	2018	D. Santamaría-Aguilar
W. Huber & A. Weissenhofer	136		Virola alleni	Virola alleni D. Santam. & Aguilar	Virola	alleni	Myristicaceae	Mesoamerica	Costa Rica	Puntarenas	Golfito	Bosque de los Austriacos. La Gamba.	300 m	300		m	08°41'N 083°13'W			1994-01-09	9	1	1994				Tree 20 m. Fruit brown-hairy	CR, LI*	2018	D. Santamaría-Aguilar
R. Aguilar et al.	14519		Virola alleni	Virola alleni D. Santam. & Aguilar	Virola	alleni	Myristicaceae	Mesoamerica	Costa Rica	PUntarenas		Península de Osa, Rancho Quemado, bosque alrededor del puesto operativo de Guardaparque, sendero a Cerro Brujo.	343 m	343		m	08°40'54"N 083°34'28"W			2013-07-30	30	7	2013					CR	2018	D. Santamaría-Aguilar
B. Hammel et al.	24041		Virola alleni	Virola alleni D. Santam. & Aguilar	Virola	alleni	Myristicaceae	Mesoamerica	Costa Rica	San José	Tarrazú	Cuenca del Naranjo y Paquita. Del puente de San Marcos 18 km camino hacia Quepos, propiedad de la familia Garro.	1370 m	1370		m	9.5958333, -84.0680556			2006-01-13	13	6	2006				Arbol 15 m. Frutos anaranjados.	CR	2018	D. Santamaría-Aguilar
E. Chacón et. al.	885		Virola alleni	Virola alleni D. Santam. & Aguilar	Virola	alleni	Myristicaceae	Mesoamerica	Costa Rica	Puntarenas	Osa	Sierpe, 1 km antes de la Villa Banegas	55 m	55		m	08°30'17"N 08°40'18"W			2007-10-14	14	10	2007				Arbol 20 m, frutos ovoides con pubescencia café.	USJ	2018	D. Santamaría-Aguilar
J. M. Ley-López	69		Virola alleni	Virola alleni D. Santam. & Aguilar	Virola	alleni	Myristicaceae	Mesoamerica	Costa Rica	Puntarenas	Golfito	Península de Osa. Jiménez, Piro, Conservación Osa, al inicio del camino que lleva hacia Laguna Silvestre, lado derecho		NA			NA			2012-01-20	20	1	2012				Arbol apro. 20 m. Frutos con pubescencia ferruginea densa.	USJ	2018	D. Santamaría-Aguilar
P. H. Allen	6727		Virola alleni	Virola alleni D. Santam. & Aguilar	Virola	alleni	Myristicaceae	Mesoamerica	Costa Rica	Puntarenas		area between Rio Esquinas & Palmar	60 m	60		m				1953-02-18	18	2	1953				Tree 100 ft.	F*, GH*	2018	D. Santamaría-Aguilar
W. Huber	3012		Virola alleni	Virola alleni D. Santam. & Aguilar	Virola	alleni	Myristicaceae	Mesoamerica	Costa Rica	Puntarenas	Golfito	P. N. Piedras Blancas. Near the Tropenstation La Gamba on the fila (research plot, 413-F316)	200 m	200		m	08°41'N 083°13'W			27-jan-2002	27	1	2002				Tree.	LI-2 sheets*	2018	D. Santamaría-Aguilar
D. Santamaría & R. Aguilar	9865		Virola alleni	Virola alleni D. Santam. & Aguilar	Virola	alleni	Myristicaceae	Mesoamerica	Costa Rica	Puntarenas	Osa	3 km después de la quebrada Banegas, camino a Rancho Quemado. Orilla del camino	200 m	200		m	08°41'43"N 083°35'37"W			10-jan-2018	10	1	2018					CR	2018	D. Santamaría-Aguilar
K. Thomsen	746		Virola alleni	Virola alleni D. Santam. & Aguilar	Virola	alleni	Myristicaceae	Mesoamerica	Costa Rica	Puntarenas	Osa	Aguabuena, 3.5 km W of Rincón. Four-hectare permanent sample plot 1 km N of BOSCOSA station in well-drained undulating terrain with slopes of 15-35º. Tall primary forest with many palms and large lianas. Characteristic species: Symphonia, Carapa, Brosimum utile, Qualea, Otoba, Iriartea and Vantanea. Plot indiv.	350 m	350		m	08°43'N 083°31'W			1993-06-14	14	6	1993					CR	2018	D. Santamaría-Aguilar
K. Thomsen	1283		Virola alleni	Virola alleni D. Santam. & Aguilar	Virola	alleni	Myristicaceae	Mesoamerica	Costa Rica	Puntarenas	Osa	Agua Buena, 2.5 km W of Rincón. Well-drained, level terrain on farm land of Henry Monge	120 m	120		m	08°42'N 083°30'W			1995-03-10	10	3	1995				Tree some 20 m x 35 cm. Flowers yellow, fragrant.	NY*	2018	D. Santamaría-Aguilar
A. Chacón	194		Virola amistadensis	Virola amistadensis D. Santam.	Virola	amistadensis	Myristicaceae	Mesoamerica	Costa Rica	Limón		Parque Internac. La Amistad. Subiendo por la fila entre la margen derecha del Río Uren y la Quebrada Crori, Croriña.	650 m	650		m	09°20'50"N 082°59'00"W	9.34722	-82.9833	1989-07-17	17	7	1989				Arbolito de 4 m. Follaje de haz verde y envés verde tenue. Botones florales café oscuro.	CR, MO	2018	D. Santamaría-Aguilar
G. McPherson	9717	Type of Virola amistadensis	Virola amistadensis	Virola amistadensis D. Santam.	Virola	amistadensis	Myristicaceae	Mesoamerica	Panama	Bocas del Toro		Vicinity of Fortuna Dam, below pass on Chiriquí Grande road. [Coordinates on orginal label: c. 8º45'N, 82º15'W].	800 m	800		m	08°46'45"N 082°11'10"W	8.77917	-82.1861	1986-06-27	27	6	1986				Tree 8 m; perianth yellow-brown.	MO, INPA* PMA*	2018	D. Santamaría-Aguilar
T. M. Antonio	4011		Virola amistadensis	Virola amistadensis D. Santam.	Virola	amistadensis	Myristicaceae	Mesoamerica	Panama	Veraguas	Santa Fe	Vicinity of Escuela de Agricultura Alto Piedra, near Santa Fé. Along trail to the top of Cerro Tute	2800 - 3200 ft	2800	3200	f	08°28'56"N 081°05'53"W	8.48222	-81.0981	1980-04-03	3	4	1980				Tree about 4 m tall, buds greensih-brown.	INPA*, MO	2018	D. Santamaría-Aguilar
G. McPherson & J. E. Aranda	10169		Virola amistadensis	Virola amistadensis D. Santam.	Virola	amistadensis	Myristicaceae	Mesoamerica	Panama	Bocas del Toro		Along old pipeline road from continental divide. [Coordinates on orginal label: 8º55'4"N, 82º10'4"W].	900 m	900		m	08°48'06"N 082°12'30"W	8.80167	-82.2083	1986-12-27	27	12	1986				Tree 6 m; fruit brown.	INPA*, MO, PMA*	2018	D. Santamaría-Aguilar
G. McPherson	8703		Virola amistadensis	Virola amistadensis D. Santam.	Virola	amistadensis	Myristicaceae	Mesoamerica	Panama	Bocas del Toro		Along pipeline road in area of Fortuna Dam. [Coordinates on orginal label: 8º48'N, 82º15'W].	900 - 950 m	900	950	m	08°46'43"N 082°11'37"W	8.77861	-82.1936	1986-03-08	8	3	1986				Tree 13 m; fruit brown.	INPA*, MO, PMA*	2018	D. Santamaría-Aguilar
G. McPherson	9715		Virola amistadensis	Virola amistadensis D. Santam.	Virola	amistadensis	Myristicaceae	Mesoamerica	Panama	Bocas del Toro		Vicinity of Fortuna Dam, below pass on Chiriquí Grande road. [Coordinates on orginal label: c. 8º45'N, 82º15'W].	800 m	800		m	08°46'45"N 082°11'10"W	8.77917	-82.1861	1986-06-27	27	6	1986				Tree 8 m; fruit brown.	INPA*, MO	2018	D. Santamaría-Aguilar
G. McPherson	13669		Virola amistadensis	Virola amistadensis D. Santam.	Virola	amistadensis	Myristicaceae	Mesoamerica	Panama	Veraguas		Vicinity of Santa Fe on slopes of Cerro Tute-Arizona above school at Alto Piedras; on trail to summit.	900 - 1100 m	900	1100	m	08°30'N 081°10'W	8.5	-81.1667	1989-01-29	29	1	1989				Tree 4 m; fruit brown.	INPA*, MO	2018	D. Santamaría-Aguilar
G. McPherson	10687		Virola amistadensis	Virola amistadensis D. Santam.	Virola	amistadensis	Myristicaceae	Mesoamerica	Panama	Veraguas		Vicinity of Cerro Tute; forested slopes along trail to summit. 08º30'N 81º07'W 850-1000 m	850 - 1000 m	850	1000	m	08°30'N 081°07'W	8.5	-81.1167	1987-03-19	19	3	1987				Tree 8 m; fruit brown.	MO	2018	D. Santamaría-Aguilar
G. McPherson	12047		Virola amistadensis	Virola amistadensis D. Santam.	Virola	amistadensis	Myristicaceae	Mesoamerica	Panama	Veraguas		Near Cerro Tute-Arizona, above Santa Fe and Alto de Piedra.	850 - 1100 m	850	1100	m	08°30'N 081°10'W	8.5	-81.1667	1988-02-05	5	2	1988				Tree 8 m; fruit brown.	MO	2018	D. Santamaría-Aguilar
K. J. Sytsma & L. Andersson	4653		Virola amistadensis	Virola amistadensis D. Santam.	Virola	amistadensis	Myristicaceae	Mesoamerica	Panama	Veraguas	Santa Fe	Cerro Tute; E slopes; 1 km beyond Escuela Agricola Alto Piedra above Santa Fé.	900 - 1200 m	900	1200	m	08°30'39"N 081°07'32"W	8.51083	-81.1256	1981-05-14	14	5	1981				8-10 m tree, brown fruit, 1 red arillate seed, just beginning to show floral buds.	MO	2018	D. Santamaría-Aguilar
C. Kernan , P. Phillips & H.S. Kernan	876		Virola chrysocarpa	Virola chrysocarpa D. Santam. & Aguilar	Virola	chrysocarpa	Myristicaceae	Mesoamerica	Costa Rica	Puntarenas		Parque Nacional Corcovado Ollas Trail.	0 m	0		m	08°27'36"N 083°34'48"W	8.46	-83.58	1989-01-09	9	1	1989				Tree 45 m. Bole straight, bark reddish; sap clear red; foliage immature; pubescence reddish-brown; pollen being shed in visible clouds; dioecious; frequent in undisturbed lowland and ridge forest.	CR, MEXU*, MO, USJ	2018	D. Santamaría-Aguilar
R. Aguilar	11569		Virola chrysocarpa	Virola chrysocarpa D. Santam. & Aguilar	Virola	chrysocarpa	Myristicaceae	Mesoamerica	Costa Rica	Puntarenas	Osa	Distrito: Sierpe; Reserva Forestal Golfo Dulce; Rincon, Banegas centro del puelo en parches de bosque y charrales junto al cacerio.	49 m	49	0	m	08°40'10"N 083°30'40"W	8.66944	-83.5111	2008-12-15	15	12	2008				Arbol 15 m., 25 cm. Flores amarillo ferrugineo.	MO, NY n.v., PMA	2018	D. Santamaría-Aguilar
A. Azofeifa	683		Virola chrysocarpa	Virola chrysocarpa D. Santam. & Aguilar	Virola	chrysocarpa	Myristicaceae	Mesoamerica	Costa Rica	Puntarenas	Golfito	P.N. Corcovado. Península de Osa. Río Agujas. Estación Agujas. Sendero Leiba.	300 m	300		m	08°31'53"N 083°26'01"W	8.53133	-83.4336	1998-02-18	18	2	1998				Arbusto de 15 m x 20 cm. Botones florales cafés, savia ausente.	CR-2 sheets, MO	2018	D. Santamaría-Aguilar
A. F. Skutch	4241		Virola chrysocarpa	Virola chrysocarpa D. Santam. & Aguilar	Virola	chrysocarpa	Myristicaceae	Mesoamerica	Costa Rica	San José	Perez Zeledon	Vicinity of El General	640 m	640		m	09°20'48"N 083°39'27"W	9.34667	-83.6575	Feb. 1939		2	1939				Tree 40 m.; fls. pale yellow.	MO	2018	D. Santamaría-Aguilar
A. F. Skutch	4260		Virola chrysocarpa	Virola chrysocarpa D. Santam. & Aguilar	Virola	chrysocarpa	Myristicaceae	Mesoamerica	Costa Rica	San José	Perez Zeledon	Vicinity of El General	640 m	640		m	09°20'48"N 083°39'27"W	9.34667	-83.6575	1939-03-01		3	1939				Candela'. Tree 40 m.; fls. pale yellow.	MO, US n.v.	2018	D. Santamaría-Aguilar
P. H. Allen	5554		Virola chrysocarpa	Virola chrysocarpa D. Santam. & Aguilar	Virola	chrysocarpa	Myristicaceae	Mesoamerica	Costa Rica	Puntarenas	Osa	Forest below Esquinas Experiment Station Residence. Area between Río Esquinas and Palmar Sur de Osa.	100 ft	100		f	08°51'36"N 083°21'00"W	8.86	-83.35	1950-05-30	30	5	1950				Tree, 100-120 ft. Fruits yellow, with a scarlet aril and brown seeds. Frequent in forest.	CR-2 sheets, MEXU*, MO-2 sheets, PMA*	2018	D. Santamaría-Aguilar
R. Aguilar	3082	Type of Virola chrysocarpa	Virola chrysocarpa	Virola chrysocarpa D. Santam. & Aguilar	Virola	chrysocarpa	Myristicaceae	Mesoamerica	Costa Rica	Puntarenas	Golfito	P.N. Corcovado. Península de Osa. Estación Sirena. Alrededor de Sendero Ollas.	10 m	10		m	08°28'50"N 083°35'30"W	8.48056	-83.5917	1994-02-06	6	2	1994				Árbol de 35 m. × 50 cm. DAP. Gambas de 2.50 m. Corteza y sabia pardo rojiza. Fuste cilíndrico. Flores amarillo pálido.	CR-2 sheets, LSU, MO, USJ	2018	D. Santamaría-Aguilar
R. Aguilar	3125		Virola chrysocarpa	Virola chrysocarpa D. Santam. & Aguilar	Virola	chrysocarpa	Myristicaceae	Mesoamerica	Costa Rica	Puntarenas	Osa	P.N. Corcovado. Península de Osa. Estación San Pedrillo, alrededor del límite.	10 - 100 m	10	100	m	08°37'00"N 083°44'00"W	8.61667	-83.7333	1994-02-19	19	2	1994				Árbol de 35 m × 40 cm DAP. Gambas de 1.60 m. Fuste cilíndrico. Flores amarillo crema.	CR-2 sheets, MO	2018	D. Santamaría-Aguilar
C. Kernan & P. Phillips	913		Virola chrysocarpa	Virola chrysocarpa D. Santam. & Aguilar	Virola	chrysocarpa	Myristicaceae	Mesoamerica	Costa Rica	Puntarenas		Parque Nacional Corcovado Llorona Forest	150 m	0	150	m	08°35'N 083°43'W	8.58333	-83.7167	1989-01-16	16	1	1989				Tree 45 m. Leaf veins, petioles and young branches covered with rusty-red branched pubescence. Flowers yellow with rusty pubescence on the outside, yellow inside; stigmas bright yellow on a white style. Frequent.	CR, INPA*, MO, USJ	2018	D. Santamaría-Aguilar
C. Kernan & P. Phillips	582		Virola chrysocarpa	Virola chrysocarpa D. Santam. & Aguilar	Virola	chrysocarpa	Myristicaceae	Mesoamerica	Costa Rica	Puntarenas		Parque Nacional Corcovado. Pavo Forest.	0 - 150 m	0	150	m	08°27'N 083°33'W - 08°30'N 083°38'W	8.45	-83.55	1988-06-16	16	6	1988				Tree, 20 m. Pericarp of the capsule bright orange. Fairly common.	CR, INPA*, MO	2018	D. Santamaría-Aguilar
Ó. Valverde	970		Virola chrysocarpa	Virola chrysocarpa D. Santam. & Aguilar	Virola	chrysocarpa	Myristicaceae	Mesoamerica	Costa Rica	San José	Tarrazu	San Lorenzo. Camino entre Cerro Pito y Cerro Toro, rumbo a Quepos.	600 - 700 m	600	700	m	09°17'54"N 083°46'20"W	9.29833	-83.7722	1998-05-26	26	5	1998				Árbol. 25 m × 50 cm DAP. Hojas pardas y pubescentes. Frutos amarillos abundantes, con semillas cubiertas por arilo rosado, consumidas por aves.	CR, MO, USJ	2018	D. Santamaría-Aguilar
B. E. Hammel, R. Aguilar & J. C. Saborío	18186		Virola chrysocarpa	Virola chrysocarpa D. Santam. & Aguilar	Virola	chrysocarpa	Myristicaceae	Mesoamerica	Costa Rica	Puntarenas		Reserva Forestal Golfo Dulce. Rancho Quemado; a lo largo de Río Riyito en la pura entrada al valle.	200 m	200		m	08°40'30"N 083°33'30"W	8.675	-83.5583	1991-03-31	31	3	1991				Árbol 20 m; frutos ferrugíneas.	CR, MEXU*, MO, USJ	2018	D. Santamaría-Aguilar
G. Maass	34		Virola chrysocarpa	Virola chrysocarpa D. Santam. & Aguilar	Virola	chrysocarpa	Myristicaceae	Mesoamerica	Costa Rica	Puntarenas	Golfito	Parque Nacional Corcovado. Península de Osa. Sirena.	1 - 20 m	1	20	m	08°28'00"N 083°35'00"W	8.46667	-83.5833	1990-06-15	15	6	1990				Árbol de 20 m × 50 cm DAP. Nombre vernacular: Fruta Dorada.	CR, MO	2018	D. Santamaría-Aguilar
B. E. Hammel, G. Herrera, M. M. Chavarría & Á. Solís	16864		Virola chrysocarpa	Virola chrysocarpa D. Santam. & Aguilar	Virola	chrysocarpa	Myristicaceae	Mesoamerica	Costa Rica	Puntarenas		Reserva Forestal Golfo Dulce. Osa Península, Rancho Quemado, ca. 15 km W of Rincón; in bottomland of valley and on ridge at NW end of valley, near Fila Ganado.	200 - 400 m	200	400	m	08°43'N 083°35'W	8.71667	-83.5833	1988-05-28	28	5	1988				Tree 20 m tall, 40 dbh; fruits orange.	CR, INPA*, MO, PMA*	2018	D. Santamaría-Aguilar
J. F. Morales	3690		Virola chrysocarpa	Virola chrysocarpa D. Santam. & Aguilar	Virola	chrysocarpa	Myristicaceae	Mesoamerica	Costa Rica	Puntarenas	Golfito	P.N. Corcovado; Península de Osa. Bosque primario en el sendero Las Ollas, cerca del Río Camaronal.	100 - 150 m	100	150	m	08°28'48"N 083°34'48"W	8.48	-83.58	1995-03-21	21	3	1995				Arbol de 29 m x 89 cm DAP. Frutos verde- oscuro.	CR, LSU, MO	2018	D. Santamaría-Aguilar
R. Aguilar	11190		Virola chrysocarpa	Virola chrysocarpa D. Santam. & Aguilar	Virola	chrysocarpa	Myristicaceae	Mesoamerica	Costa Rica	Puntarenas		Osa. Distrito: Sierpe; Reserva Forestal Golfo Dulce; Mogos, a 20 km. de Chacarita, camino que lleva a la finca de Elegio Campos A.	100 m	100			8.7786, -83.3528			17-apr-2008	17	4	2008				Arbol 25 m., 30 cm. Frutos verdes.	NY*, USJ	2018	D. Santamaría-Aguilar
K. Thomsen	371		Virola chrysocarpa	Virola chrysocarpa D. Santam. & Aguilar	Virola	chrysocarpa	Myristicaceae	Mesoamerica	Costa Rica	Puntarenas		Aguabuena, 3 km W of Rincón. Tall forest on land of Henry Monge. Sloping terrain, close to moist ravine	120 m	120		m	08°42'N 083°30'W			1993-05-06	6	5	1993				Tree some 35m x 45 cm. Bark reddish, finely fissured. Fruits brown.	CR-2 sheets	2018	D. Santamaría-Aguilar
G. P. Cooper & G. M. Slater	175		Virola chrysocarpa	Virola chrysocarpa D. Santam. & Aguilar	Virola	chrysocarpa	Myristicaceae	Mesoamerica	Panama	Chiriquí		Progreso					08°27'N 082°50'W											F*, GH*, NY*	2018	D. Santamaría-Aguilar
J. D. Dwyer	8420A		Virola elongata	Virola elongata (Benth.) Warb.	Virola	elongata	Myristicaceae	Mesoamerica	Panama	Canal Area		Between Chilibre and Madden Dam on Transisthmian Highway.					09°24'30"N 079°38'30"W	9.40833	-79.6417								Shrub to 10 feet; fruits glaucous green with ring of yellow latex within; fruit with one groove externally.	MO	2018	D. Santamaría-Aguilar
I. M. Johnston	1796		Virola elongata	Virola elongata (Benth.) Warb.	Virola	elongata	Myristicaceae	Mesoamerica	Panama	Canal Area		Near Indio Tower. Northwestern part of Canal Zone (area west of Limon Bay, Gatun Locks and Gatun Lake)	150 m	150		m	09°16'39"N 079°58'32"W	9.2775	-79.9756	1956-04-05	5	4	1956				Tree 40 feet tall, abundantly fruiting. With gall?	MO	2018	D. Santamaría-Aguilar
M. D. Correa & R. L. Dressler	1078		Virola elongata	Virola elongata (Benth.) Warb.	Virola	elongata	Myristicaceae	Mesoamerica	Panama	Colón		Camino a la zona maderera de Santa Rita.					09°19'N 079°39'W - 09°24'N 079°48'W	9.31667	-79.65	1968-10-03	3	10	1968				Arbolito delgado de 7 m de alto. Flores amarillas	MO	2018	D. Santamaría-Aguilar
S. A. Mori & J. A. Kallunki	2423		Virola elongata	Virola elongata (Benth.) Warb.	Virola	elongata	Myristicaceae	Mesoamerica	Panama	Colón		Near Río Boqueron on trail (Old Road) to Boquerón Mine # 2 N of Peluca Hydrographic Station					09°25'N 079°33'W	9.41666	-79.55	1974-10-11	11	10	1974				Common tree, 8 m tall, 12 cm dbh. Many seen in bloom.	MO	2018	D. Santamaría-Aguilar
J. D. Dwyer & M. D. Correa	8420		Virola elongata	Virola elongata (Benth.) Warb.	Virola	elongata	Myristicaceae	Mesoamerica	Panama	Colón		Santa Rita, East Ridge					09°24'30"N 079°38'30"W	9.40833	-79.6417	1968-01-23	23	1	1968				Shrub to 10 feet; fruits glaucous, green with ring of yellow latex within (x-sect.), fruit with one groove externally.	MO	2018	D. Santamaría-Aguilar
K. J. Sytsma	1346		Virola elongata	Virola elongata (Benth.) Warb.	Virola	sebifera	Myristicaceae	Mesoamerica	Panama	Colón		Santa Rita Ridge Road, 20-22 km from Transismithica Hwy. [Coordinates on original label: 09º24'N, 079º39'W]	1000 - 1200 ft	1000	1200	f	09°23'30"N 079°39'30"W - 09°24'30"N 079°39'30"W	9.39167	-79.6583	1980-09-25	25	9	1980				15+ m tree, yellow orange flowers, cut bark aromatic.	MO	2018	D. Santamaría-Aguilar
G. McPherson	11861		Virola elongata	Virola elongata (Benth.) Warb.	Virola	elongata	Myristicaceae	Mesoamerica	Panama	Panamá		Along El Llano to Carti road, along short side-road to west.	150 - 250 m	150	250	m	09°15'N 079°00'W	9.25	-79	1987-12-15	15	12	1987				Tree 7 m; leaves light green beneath; fruit green.	MO	2018	D. Santamaría-Aguilar
J. D. Dwyer	1383		Virola elongata	Virola elongata (Benth.) Warb.	Virola	sebifera	Myristicaceae	Mesoamerica	Panama	Panamá	Panamá	Cerro Azul	600 m	600		m	09°10'02"N 079°24'59"W	9.16722	-79.4164	1961-08-06	6	8	1961				Tree 35 feet; DBH 5 inches; flowers cream-white within, dull brown without.	MO	2018	D. Santamaría-Aguilar
J. D. Dwyer	2643		Virola elongata	Virola elongata (Benth.) Warb.	Virola	elongata	Myristicaceae	Mesoamerica	Panama	Panamá	Panamá	Cerro Azul	700 m	700		m	09°10'02"N 079°24'59"W	9.16722	-79.4164	1962-08-01		8	1962				Tree 20 feet tall; fruits often bilobed, rusty crustulose.	MO	2018	D. Santamaría-Aguilar
E. L. Tyson	6866		Virola elongata	Virola elongata (Benth.) Warb.	Virola	elongata	Myristicaceae	Mesoamerica	Panama	Panamá	Chepo	W of El Llano along road to Jesus Maria	20 - 50 m	20	50	m	09°12'59"N 078°59'59"W	9.21639	-78.9997	1972-10-03	3	10	1972				Treelet 25 feet tall, 3 inches dbhm fruits rusty.	MO	2018	D. Santamaría-Aguilar
E. L. Tyson	6867		Virola elongata	Virola elongata (Benth.) Warb.	Virola	elongata	Myristicaceae	Mesoamerica	Panama	Panamá	Chepo	W of El Llano along road to Jesus Maria.	20 - 50 m	20	50	m	09°12'59"N 078°59'59"W	9.21639	-78.9997	1972-10-03	3	10	1972				Treelet 20 feet tall, 3 inches dbh, inflorescence yellow-orange.	MO	2018	D. Santamaría-Aguilar
R. L. Dressler	4316		Virola elongata	Virola elongata (Benth.) Warb.	Virola	elongata	Myristicaceae	Mesoamerica	Panama	Panamá	Panamá	La Eneida, about 16 km east of Cerro Azul (Goofy Lake)	750 m	750		m	09°11'20"N 079°23'05"W	9.18889	-79.3847	1973-04-05	5	4	1973				Tree 8 m tall; fruit green, becoming yellowish; aril red, seed grey.	MO	2018	D. Santamaría-Aguilar
J. A. Duke	5508		Virola elongata	Virola elongata (Benth.) Warb.	Virola	elongata	Myristicaceae	Mesoamerica	Panama	Panamá	Chepo	Vicinity of El Llano					09°12'58"N 078°58'30"W	9.21611	-78.975	07 Sep 1962 - 08 Sep 1962	7	9	1962	8	9	1962	Tree.	MO	2018	D. Santamaría-Aguilar
M. D. Correa & R. L. Dressler	585		Virola elongata	Virola elongata (Benth.) Warb.	Virola	elongata	Myristicaceae	Mesoamerica	Panama	Panamá	Panamá	Una milla después del Lago Goofy.				m				1968-01-04	4	1	1968				Árbol de 25 pies.	MO	2018	D. Santamaría-Aguilar
A. H. Gentry	3797		Virola elongata	Virola elongata (Benth.) Warb.	Virola	elongata	Myristicaceae	Mesoamerica	Panama	Panamá	Chepo	1/2 hour by foot from Río Bayano on trail to Río Parití	2 - 50 m	2	50	m	09°11'20"N 078°53'05"W - 09°09'09"N 078°18'44"W	9.18889	-78.8847	1972-01-24	24	1	1972				Tree 15 meters; fruits green.	MO	2018	D. Santamaría-Aguilar
M. H. Nee, A. H. Gentry & R. L. Dressler	8791		Virola elongata	Virola elongata (Benth.) Warb.	Virola	elongata	Myristicaceae	Mesoamerica	Panama	Panamá	Chepo	Premontane wet forest along new El Llano-Cartí road, 8-12 km N of El Llano	400 - 450 m	400	450	m	09°16'10"N 078°55'41"W	9.26944	-78.9281	1973-12-12	12	12	1973				Slender tree 10 m tall; 10 cm dbh with annonaceous branching; fruit brown.	MO	2018	D. Santamaría-Aguilar
J. A. Duke	5667		Virola elongata	Virola elongata (Benth.) Warb.	Virola	elongata	Myristicaceae	Mesoamerica	Panama	Panamá	Chepo	Gallery along Río Terable, near Pan Am Highway & El Llano	50 m	50		m	09°12'44"N 078°58'04"W	9.21222	-78.9678	14 Sep 1962 - 15 Sep 1962	14	9	1962	15	9	1962	Tree.	MO	2018	D. Santamaría-Aguilar
G. C. de Nevers, H. Herrera & S. Charnley	7573		Virola elongata	Virola elongata (Benth.) Warb.	Virola	elongata	Myristicaceae	Mesoamerica	Panama	San Blas		Cangandí. Hills near village.	30 m	30		m	09°27'N 079°06'W	9.45	-79.1	1986-03-27	27	3	1986				Tree; DBH 20.2 cm; cuadrat #121. Kuna name "cannir sa war".	MO	2018	D. Santamaría-Aguilar
G. McPherson	13674		Virola elongata	Virola elongata (Benth.) Warb.	Virola	elongata	Myristicaceae	Mesoamerica	Panama	San Blas		San Blas-Panamá border trail along continental divide to east of Nusagandi. [Coordinates on original label: 09º15'N, 079º00'W]	300 m	300		m	09°21'N 078°58'W	9.35	-78.9667	1989-02-01	1	2	1989				Tree 10 m; fruit green.	MO	2018	D. Santamaría-Aguilar
B. E. Hammel	18392		Virola fosteri	Virola fosteri D. Santam.	Virola	fosteri	Myristicaceae	Mesoamerica	Costa Rica	Limón	Talamanca	Cerros al sur del camino entre Puerto Viejo y Manzanillo por un camino nuevo hacia Bribri.	100 m	100		m	09°37'20"N 085°41'20"W (Esta coordenada esta mala	9.62222	-85.6889	1992-01-18	18	1	1992				Árbol 35 m, en potrero a la par del camino.	CR-sheets, MEXU, MO	2018	D. Santamaría-Aguilar
J. A. González, I. Chacón, E. Salazar & C. McGinley	1632		Virola fosteri	Virola fosteri D. Santam.	Virola	fosteri	Myristicaceae	Mesoamerica	Costa Rica	Limón	Talamanca	Cuenca del Sixaola. San Miguel, Asacode, sendero a San Miguel.	30 - 100 m	30	100	m	09°34'30"N 082°40'00"W	9.575	-82.6667	1997-01-18	18	1	1997				Arbol derribado, ca. 20 m x cm DAP. Flores amarillas. Tumbado en límite de bosque con trocha.	CR, MEXU, MO	2018	D. Santamaría-Aguilar
J. Gómez-Laurito et al.	13903		Virola fosteri	Virola fosteri D. Santam.	Virola	fosteri	Myristicaceae	Mesoamerica	Costa Rica	Limón	Talamanca	Reserva Indigena Talamanca-Bribrí, Bratsi. Lomas Mreduk (La Pera), antiguo campo de exploración petrolera	300 - 350 m	300	350	m				2002-10-06	6	10	2002				Arbol 7 m. Copa piramidal. Infls amarillenta	USJ	2018	D. Santamaría-Aguilar
G. C. de Nevers, H. Herrera & S. Charnley	7608		Virola fosteri	Virola fosteri D. Santam.	Virola	fosteri	Myristicaceae	Mesoamerica	Panama	San Blas		Cangandí. Hills near village.	30 m	30		m	09°27'N 079°06'W	9.45	-79.1	1986-03-27	27	3	1986				Tree; DBH 38.4 cm; cuadrat #269; flowers yellow; fruits green.	MO	2018	D. Santamaría-Aguilar
R. B. Foster	2946		Virola fosteri	Virola fosteri D. Santam.	Virola	fosteri	Myristicaceae	Mesoamerica	Panama	Canal Area		Barro Colorado Island. Wetmore Trail	20 - 70 m	20	70	m	09°08'39"N 079°51'09"W	9.14417	-79.8525	1980			1980				Fallen tree, 35 m. Flowers pale orange.	CR, F*, MO, PMA*, U*, US*	2018	D. Santamaría-Aguilar
G. McPherson	20148		Virola fosteri	Virola fosteri D. Santam.	Virola	fosteri	Myristicaceae	Mesoamerica	Panama	Colón	Donoso	Teck Cominco Petaquilla mining concession. Forest along ridge road. Collected with M. Merello.	300 m	300		m	08°49'44"N 080°40'28"W	8.82889	-80.6744	2008-02-22	22	2	2008				Fallen canopy tree; perianth yellow.	MO	2018	D. Santamaría-Aguilar
G. McPherson	20913		Virola fosteri	Virola fosteri D. Santam.	Virola	fosteri	Myristicaceae	Mesoamerica	Panama	Colón	Donoso	Westernmost part of province, site of proposed copper mine (INMET). Along route of proposed road. Lowland forest. Collected with Jean-Yves Serein.	150 m	150		m	08°53'04"N 080°42'27"W	8.88444	-80.7075	2009-04-12	12	4	2009				Tree 30 m; fruit green.	MO, PMA*	2018	D. Santamaría-Aguilar
C. Galdames, M. Stapf, K. Toribio & Arsenio	6422	Type of Virola fosteri	Virola fosteri	Virola fosteri D. Santam.	Virola	fosteri	Myristicaceae	Mesoamerica	Panama	Bocas del Toro		Isla Colón. Aprox. a 8 km al NE de los laboratorios del Instituto Smithsonian de Investigaciones Tropicales, Big Creek.	5 m	5		m	09°21'51"N 082°14'42"W	9.36417	-82.245	2009-04-23	23	4	2009				Árbol de 15 m. Inflorescencias completamente amarillos-anaranjadas.	MO, SCZ	2018	D. Santamaría-Aguilar
G. C. de Nevers, H. Herrera & S. Charnley	5285		Virola fosteri	Virola fosteri D. Santam.	Virola	fosteri	Myristicaceae	Mesoamerica	Panama	San Blas		El Llano-Cartí Road. Km. 26.5.					09°22'N 078°58'W	9.36667	-78.9667	1985-04-10	10	4	1985				Tree 30 m; fruits green.	INPA*, MEXU*, MO, PMA*	2018	D. Santamaría-Aguilar
S. A. Mori & J. A. Kallunki	4891		Virola fosteri	Virola fosteri D. Santam.	Virola	fosteri	Myristicaceae	Mesoamerica	Panama	Veraguas	Santa Fe	NW of Santa Fé. km from Escuela Agricola Alto de Piedra. Near entrance to school	800 m	800		m	08°30'47"N 081°06'54"W	8.51306	-81.115	1975-02-26	26	2	1975				Tree, 20 m tall, 35 cm dbh. Fruit golden brown, aril red.	MO	2018	D. Santamaría-Aguilar
R. B. Foster	2931		Virola fosteri	Virola fosteri D. Santam.	Virola	fosteri	Myristicaceae	Mesoamerica	Panama	Canal Area		Barro Colorado Island. Slope between AVA 7 and FD 5.	10 - 100 m	10	100	m	09°09'25"N 079°50'30"W	9.15694	-79.8417	1979-03-30	30	3	1979				Large buttressed canopy tree, 35 m, red watery sap; fruit orange with red aril; flowers pale orange brown. Leaves are consistently small throughout the tree and on juvenile plants.	MO, PMA*	2018	D. Santamaría-Aguilar
G. C. de Nevers	7226		Virola fosteri	Virola fosteri D. Santam.	Virola	fosteri	Myristicaceae	Mesoamerica	Panama	San Blas		El Llano-Cartí road, Km 32,3. [Coordinates on original label: 9º19'N, 78º55'W]	200 m	200		m	09°22'N 078°58'W	9.36667	-78.9667	1986-03-02	2	3	1986				Tree 30 m; flowers yellow; fruits yellowish-green	INPA*, MO, PMA*	2018	D. Santamaría-Aguilar
R. Aizprúa et al.	3398-RA		Virola fosteri	Virola fosteri D. Santam.	Virola	fosteri	Myristicaceae	Mesoamerica	Panama	Bocas del Toro		Parcela ubicada a 10 km de la desembocadura de la quebrada Boca Chica en la margen izquierda del río Changuinola	550 m	550		m	09°16'00"N, 082°31'00"W			2017-10-23	23	10	2017				Arbol 40 m. Flores amarillas, tronco con savia rojiza	PMA*, US	2018	D. Santamaría-Aguilar
N. Daguerre et al.	660-ND		Virola fosteri	Virola fosteri D. Santam.	Virola	fosteri	Myristicaceae	Mesoamerica	Panama	Bocas del Toro		Parcela ubicada a 10 km de la desembocadura de la quebrada Boca Chica en la margen izquierda del río Changuinola	550 m	550		m	09°16'00"N, 082°31'00"W			2017-10-23	23	10	2017				Arbol ca. 25 m. Botones florales de color amarillo	PMA*, US	2018	D. Santamaría-Aguilar
G. McPherson & B. Allen	9646		Virola fosteri	Virola fosteri D. Santam.	Virola	fosteri	Myristicaceae	Mesoamerica	Panama	Bocas del Toro		Along road to Chiriquí Grande, c. 1.5 miles along side road east of highway [Coordinates on orginal label: 08º55'N, 82º10'W]	250 - 300 m	250	300	m	08°54'57"N 082°09'06"W	8.91583	-82.1517	1986-06-24	24	6	1986				In windfall; flower pale yellow-brown.	MO	2018	D. Santamaría-Aguilar
J. Lezcano	593		Virola fosteri	Virola fosteri D. Santam.	Virola	fosteri	Myristicaceae	Mesoamerica	Panama	Colón		San Lorenzo								2009-06-30	30	6	2009				Arbol 28 metros de altura, en produccion de frutos. Semillas con arilo lacerado rojo.	PMA*	2018	D. Santamaría-Aguilar
N. C. Garwood	2301A		Virola fosteri	Virola fosteri D. Santam.	Virola	fosteri	Myristicaceae	Mesoamerica	Panama	Panamá		Barro Colorado Island.	[10–100 m]	10	100	m				1988-03-31	31	3	1988				Canopy tree, 35 dbh, fruit 2.5-2.7 cm long, 1.8-1.9 cm wide; seed 1.8 cm long, 1.1 cm wide; aril red; fruit and leaves collected on ground below tree.	PMA*	2018	D. Santamaría-Aguilar
R. Pérez, S. Aguilar, N. Dagurre	1130		Virola fosteri	Virola fosteri D. Santam.	Virola	fosteri	Myristicaceae	Mesoamerica	Panama	Colón		Camino viejo de Piñas-Sherman	111 m	111		m				2002-09-22	22	9	2002				Arbol 20 m altura. Con exudado rojizo. Flores amarillas.	MO n.v., PMA*, SCZ*	2018	D. Santamaría-Aguilar
J. A. Steyermark	47624		Virola guatemalensis	Virola guatemalensis (Hemsl.) Warb.	Virola	guatemalensis	Myristicaceae	Mesoamerica	Guatemala	Sololá		Bordering barranco on Finca Olas de Mocá, just west of Finca Mocá, south-facing slopes of Volcán Atitlán	1000 - 1100 m	1000	1100	m	14°32'03"N 091°13'38"W	14.5342	-91.2272	1942-06-15	15	6	1942					F*, MO-3 sheets	2018	D. Santamaría-Aguilar
T. Hawkins & M. Merello	768B		Virola guatemalensis	Virola guatemalensis (Hemsl.) Warb.	Virola	guatemalensis	Myristicaceae	Mesoamerica	Honduras	Yoro		Cascada de Río Guán Guán. Recently felled old secondary forest on the east slopes of the Río Guán Guán waterfall. Forest was being cleared for conversion to cornfield and pasture as we collected.	400 - 440 m	400	440	m	15°29'40"N 087°27'16"W	15.4944	-87.4544	1995-04-20	20	4	1995					MO	2018	D. Santamaría-Aguilar
A. H. Gentry, E. J. Lott & UNAM Tropical Botany Class	32246		Virola guatemalensis	Virola guatemalensis (Hemsl.) Warb.	Virola	guatemalensis	Myristicaceae	Mesoamerica	Mexico	Veracruz		Estación de Biologia Tropical Los Tuxtlas, Cerro Vigia.	200 - 500 m	200	500	m	18°35'33"N 095°03'32"W	18.5925	-95.0589	1981-05-21	21	5	1981				Sterile tree 4 m, myristicaceous branching.	MO	2018	D. Santamaría-Aguilar
R. Cedillo	3479		Virola guatemalensis	Virola guatemalensis (Hemsl.) Warb.	Virola	guatemalensis	Myristicaceae	Mesoamerica	Mexico	Veracruz	Catemaco	Buenavista, camino a Naranjillo.					18°28'48"N 095°04'12"W	18.48	-95.07	1985-10-31	31	10	1985				Árbol de 12 a 15 m con frutos verdes, arilo rojo y látex amarillo rojizo. Nombre común: Cedrillo.	MO	2018	D. Santamaría-Aguilar
R. Cedillo	3349		Virola guatemalensis	Virola guatemalensis (Hemsl.) Warb.	Virola	guatemalensis	Myristicaceae	Mesoamerica	Mexico	Veracruz	Soteapan	Ejido San Fernando, SE de San Pedro Zoteapan.	300 m	300		m	18°16'12"N 094°52'48"W	18.27	-94.88	1985-08-07	7	8	1985				Árbol de 12 m. Frutos verdes.	MO	2018	D. Santamaría-Aguilar
A. S. Ton	5223		Virola guatemalensis	Virola guatemalensis (Hemsl.) Warb.	Virola	guatemalensis	Myristicaceae	Mesoamerica	Mexico	Chiapas	Tila	Chewupaj.	1000 m	1000		m				10-dec-1982	10	12	1982				Árbol de 20 m con frutos verdes.	MO	2018	D. Santamaría-Aguilar
J. I. Calzada	615		Virola guatemalensis	Virola guatemalensis (Hemsl.) Warb.	Virola	guatemalensis	Myristicaceae	Mesoamerica	Mexico	Veracruz	Catemaco	Tebanca (camino a La Magdálena).					18°22'48"N 094°57'00"W	18.38	-94.95	1971-10-20	20	10	1971				Árbol 9 m.	MEXU*, MO	2018	D. Santamaría-Aguilar
S. Sinaca & F. Chigo	255		Virola guatemalensis	Virola guatemalensis (Hemsl.) Warb.	Virola	guatemalensis	Myristicaceae	Mesoamerica	Mexico	Veracruz	San Andrés Tuxtla	Cerro Lázaro Cárdenas, lote 71. Estación de Bilogía Tropical Las Tuxtlas.	550 m	550		m	18°33'36"N 095°03'36"W - 18°36'00"N 095°09'00"W	18.56	-95.06	1985-09-09	9	9	1985				Árbol de 25 m. Corteza lisa, pardo verdosa, con exudao rojo transp. Fruto verdoso, arilo rojo. "Cedrillo."	MO	2018	D. Santamaría-Aguilar
G. Ibarra	604		Virola guatemalensis	Virola guatemalensis (Hemsl.) Warb.	Virola	guatemalensis	Myristicaceae	Mesoamerica	Mexico	Veracruz	San Andrés Tuxtla	La Escondida, 3 km NO de Estación de Biología Tropical Los Tuxtlas.	200 m	200		m	18°34'N 095°04'W - 18°36'N 095°09'W	18.5667	-95.0667	05-apr-1983	5	4	1983				Árbol 15. Flores pardas. "Cedrillo."	MEXU*, MO	2018	D. Santamaría-Aguilar
T. L. Wendt, A. Villalobos C., I. Navarrete & Abisaí J. García-Mendoza	3898		Virola guatemalensis	Virola guatemalensis (Hemsl.) Warb.	Virola	guatemalensis	Myristicaceae	Mesoamerica	Mexico	Veracruz	Hidalgotitlán	Lomitas al SE de Poblado 6.	150 m	150		m	17°15'36"N 094°29'24"W	17.26	-94.49	27-apr-1982	27	4	1982				Árbol 25 m, dap, 45-50 cm, contraf. tamaño mediano; corteza gris-parda, muy finamente fisurada; brecha de corteza; rosada con exudado aguado rojo, albura casi blanca; flores amarillas; pendientes en selva; "cedrillo."	LSU, MO	2018	D. Santamaría-Aguilar
G. Ibarra, S. Sinaca, M. Illiescas, J. Ochoa, E. González S. & R. González S.	2357		Virola guatemalensis	Virola guatemalensis (Hemsl.) Warb.	Virola	guatemalensis	Myristicaceae	Mesoamerica	Mexico	Veracruz	Soteapan	Ocotal Grande, 5 km N de Mecayapan.	1000 m	1000		m	18°15'00"N 094°51'00"W	18.25	-94.85	1985-03-14	14	3	1985				Árbol de 20 m. Corteza escamosa, pardo grisácea. Exudado abundante, tanslúcido, después rojizo. Drupa verde amarilla.	MEXU*, MO, NO	2018	D. Santamaría-Aguilar
G. Ibarra	957		Virola guatemalensis	Virola guatemalensis (Hemsl.) Warb.	Virola	guatemalensis	Myristicaceae	Mesoamerica	Mexico	Veracruz	San Andrés Tuxtla	LOTE 67. Estación de Biología Tropical Las Tuxtlas.	200 m	200		m	18°33'36"N 095°03'36"W - 18°36'00"N 095°09'00"W	18.56	-95.06	1983-10-29	29	10	1983				Árbol de 15 m. Corteza con exudado rojizo. Fruto con una semilla parda, cubierta con un arilo rojizo. "Cedrillo."	MO	2018	D. Santamaría-Aguilar
G. Ibarra & S. Sinaca	2450		Virola guatemalensis	Virola guatemalensis (Hemsl.) Warb.	Virola	guatemalensis	Myristicaceae	Mesoamerica	Mexico	Veracruz	San Andrés Tuxtla	Estación de Bilogía Tropical Las Tuxtlas. 2 km al NW del rancho Rubén Sánchez. Lote 69 m.	250 - 350 m	250	350	m	18°33'36"N 095°03'36"W - 18°36'00"N 095°09'00"W	18.56	-95.06	1985-05-28	28	5	1985				Árbol de 35 m. Corteza lisa, parda. Exudado transparente después rojizo. Flores estaminadas, amarillentas, fragantes. "Cedrillo".	MO	2018	D. Santamaría-Aguilar
R. Cedillo & G. Pérez Higareda	2958		Virola guatemalensis	Virola guatemalensis (Hemsl.) Warb.	Virola	guatemalensis	Myristicaceae	Mesoamerica	Mexico	Veracruz	Catemaco	El Chinchero, 14.2 km al SE de Tebanca camino al Río Huacinapan.					18°19'12"N 094°58'12"W	18.32	-94.97	19-dec-1984	19	12	1984				Árbol de 25 m; frutos verdes.	MEXU*, MO, NO	2018	D. Santamaría-Aguilar
H. Hernández G.	1212		Virola guatemalensis	Virola guatemalensis (Hemsl.) Warb.	Virola	guatemalensis	Myristicaceae	Mesoamerica	Mexico	Oaxaca		Mpio. Sta. María Chimalapa: Cresta del cerro cerca de la cabecera del Arroyo Cuuseu (en zoque), región del río Verde en área de explotación forestal, ca. 8-10 km en línea recta al N de Sta. Ma?a, al N del Río Verde y S. del Arroyo Hamaca	350 m	350		m	17°00'00"N 094°40'48"W	17	-94.68	1985-06-11	11	6	1985				Arbol, 17 m de alto. dap 130 cm; contrafuertes medianos; corteza verdosa, ligeramente verrugosa; brecha amarillenta con poco de anaranjado, látex anaranjado combiando a rojo; madera que cambia a color mole, blanda, olor caracteristico	MO	2018	D. Santamaría-Aguilar
Patricia Vera Caletti, M. González, Mario Ishiki I. & Heriberto Hernández G.	261		Virola guatemalensis	Virola guatemalensis (Hemsl.) Warb.	Virola	guatemalensis	Myristicaceae	Mesoamerica	Mexico	Oaxaca		Mpio. Sta. María Chimalapa: Río Verde, 7 km en línea recta al NNE de Sta. María Chimalapa.	360 - 430 m	360	430	m	16°58'12"N 094°39'36"W	16.97	-94.66	1986-10-15	15	10	1986				Arbol 25 m de alto, sin contrafuertes; corteza finamente rugosa, café grisaceo, fisuras verticales; brecha de corteza; rojiza con estrias crema. Escaso. N.v. "cedrillo" "pa-ahacuy" (en zoque).	MO	2018	D. Santamaría-Aguilar
E. Velasco-Sinaca	678		Virola guatemalensis	Virola guatemalensis (Hemsl.) Warb.	Virola	guatemalensis	Myristicaceae	Mesoamerica	Mexico	Veracruz	San Andrés Tuxtla	Cima del cerro Vigia, Lote 67, Estación de Biologia "Los Tuxtlas", 30 km de Catemaco a Montepio. Los Tuxtlas.	450 m	450		m	18°34'54"N 095°04'54"W	18.5816	-95.0816	19-apr-2005	19	4	2005				Árbol 24 m.	MEXU*, MO	2018	D. Santamaría-Aguilar
R. Cedillo	9		Virola guatemalensis	Virola guatemalensis (Hemsl.) Warb.	Virola	guatemalensis	Myristicaceae	Mesoamerica	Mexico	Veracruz	Veracruz	Cerro El Vigia de Santiago Tuxtla.	800 m	800		m				1967-02-18	18	2	1967				Árbol perenne, fruto, arilo rojo. Nombre local: cedrillo.	MO	2018	D. Santamaría-Aguilar
G. Ibarra & S. Sinaca	1607		Virola guatemalensis	Virola guatemalensis (Hemsl.) Warb.	Virola	guatemalensis	Myristicaceae	Mesoamerica	Mexico	Veracruz	San Andrés Tuxtla	Camino Laguna Escondida, 2 km NW de la Estacion de biologia Tropical Los Tuxtlas. Lote 67.	200 m	200		m	18°34'N 095°04'W - 18°36'N 095°09'W	18.5667	-95.0667	1984-05-08	8	5	1984				Árbol de 20 m y 60 cm de dap. Corteza parda, con exudado transparente a rojizo. Flores verde amarillenjtas estaminadas. "Cedrillo."	MO	2018	D. Santamaría-Aguilar
M. Sousa	3680		Virola guatemalensis	Virola guatemalensis (Hemsl.) Warb.	Virola	guatemalensis	Myristicaceae	Mesoamerica	Mexico	Veracruz	Santiago Tuxtla	Alta Luz. MAPA 22.0/53.0.	540 m	540		m				1968-05-11	11	5	1968				Árbol. TAM.18M. Nombre local: cedrillo.	MO	2018	D. Santamaría-Aguilar
S. Sinaca	1542		Virola guatemalensis	Virola guatemalensis (Hemsl.) Warb.	Virola	guatemalensis	Myristicaceae	Mesoamerica	Mexico	Veracruz	San Andrés Tuxtla	Laguna Escondida, 5 km al NE de la Estación de Biologia Tropical Los Tuxtlas.	180 m	180		m	18°34'N 095°04'W - 18°36'N 095°09'W	18.5667	-95.0667	1989-10-04	4	10	1989				Árbol de 22 m, corteza ligeramente fisurada, café. Cápsulas verde amarillas, una semilla café por fruto, con un arilo rojo. Nombre común: cedrillo.	MO	2018	D. Santamaría-Aguilar
D. E. Breedlove & F. Almeda	57735		Virola guatemalensis	Virola guatemalensis (Hemsl.) Warb.	Virola	guatemalensis	Myristicaceae	Mesoamerica	Mexico	Chiapas	La Independencia	Ridge, 45-50 km E of Lagos de Montebello National Park on road to Ixcán from Santa Elena.	760 m	760		m	16°07'04"N 091°17'29"W	16.1178	-91.2914	1982-01-22	22	1	1982				Tree 70 ft tall	MO	2018	D. Santamaría-Aguilar
D. E. Breedlove & F. Almeda	57553		Virola guatemalensis	Virola guatemalensis (Hemsl.) Warb.	Virola	guatemalensis	Myristicaceae	Mesoamerica	Mexico	Chiapas	La Trinitaria	10 km east northeast of Dos Lagos above Santa Elena.	1170 m	1170		m	16°06'36"N 091°34'18"W	16.11	-91.5717	1982-01-19	19	1	1982				Tree 80 ft tall	MO	2018	D. Santamaría-Aguilar
T. Wendt et al.	3235		Virola guatemalensis	Virola guatemalensis (Hemsl.) Warb.	Virola	guatemalensis	Myristicaceae	Mesoamerica	Mexico	Oaxaca	Matías Romero	Matías Romero, más o menos 11 km al S de Aserradero La Floresta, mas o menos 24 km al S de Esmeralda, lomas al S del Río Verde	300 m			m	17°00'00"N 094°40'48"W				24	4	1981				Arbo 25 m x 1 m DAP, contrafuertes tamaño mediano ; corteza color chocolate mediana, escamosa. Brecha de corteza rojo-pardo oscura, con exudado aguado, color sangre, madera rosa-parda pálida; flores parduzco-amarillo pálidas; se ocupa mucho la madera; cedrillo	MEXU*	2018	D. Santamaría-Aguilar
G. Ibarra Manriquez & S. Sinaca	1741		Virola guatemalensis	Virola guatemalensis (Hemsl.) Warb.	Virola	guatemalensis	Myristicaceae	Mesoamerica	Mexico	Veracruz	San Andrés Tuxtla	Estación de Biología Tropical Los Tuxtlas Lote 67	200 m			m				1981-06-10	10	6	1981				Arbol de 15 m, corteza lisa, parda. Exudado transparente rojizo. Flores estaminadas amarillentas.	MEXU*	2018	D. Santamaría-Aguilar
J.I. Calzada	5173		Virola guatemalensis	Virola guatemalensis (Hemsl.) Warb.	Virola	guatemalensis	Myristicaceae	Mesoamerica	Mexico	veracruz	Soteapan	5 km al oeste de la Sta. Martha. Sierra de Santa Marta.	1350 m	1350		m				1978-12-20	20	12	1978				Arbol 30 m. Fruto verde.	MEXU*	2018	D. Santamaría-Aguilar
E. Velasco-Sinaca	635		Virola guatemalensis	Virola guatemalensis (Hemsl.) Warb.	Virola	guatemalensis	Myristicaceae	Mesoamerica	Mexico	Veracruz	San Andrés Tuxtla - Lote 72: Límite de la Estación con "Rancho Puchulín". Los Tuxtlas		900 m			m	18.58N, 95.1206W			2005-04-21	21	4	2005				Arbol 23 m.	MEXU*	2018	D. Santamaría-Aguilar
A. Rincón et al.	2114		Virola guatemalensis	Virola guatemalensis (Hemsl.) Warb.	Virola	guatemalensis	Myristicaceae	Mesoamerica	Mexico	Veracruz	Catemaco. Cerro Jegal, 8 km al N de Catemaco		940 m	940		m	18.48472°N, 95.06472°W			2000-11-04	4	11	2000				Arbol 30 m, dap 1 m. Ramillas con jugo transparente café que pronto se oxida y oscure. Madera blanda; fruto verde, semillas con arillo naranja.	MEXU*	2018	D. Santamaría-Aguilar
A. Campos Villanueva & R. Coates	7361		Virola guatemalensis	Virola guatemalensis (Hemsl.) Warb.	Virola	guatemalensis	Myristicaceae	Mesoamerica	Mexico	Veracruz	San Andrés Tuxtla. La Perla de San Martín, al NO de San Andrés Tuxtla.		742 m	742		m	18.559°N, 95.124°W			2011-05-20	20	5	2011				Arbol 20m. Flor amarilla.	MEXU*	2018	D. Santamaría-Aguilar
A. Campos V. & M. Antonio López L.	5839		Virola guatemalensis	Virola guatemalensis (Hemsl.) Warb.	Virola	guatemalensis	Myristicaceae	Mesoamerica	Mexico	Veracruz	San Andrés Tuxtla. Laguna Escondida, sobre la rivera, lado N de los límites de la Estación									2002-09-08	8	9	2002				Arbol 15. fruto inmaduro	MEXU*	2018	D. Santamaría-Aguilar
D. E. Breedlove	49868		Virola guatemalensis	Virola guatemalensis (Hemsl.) Warb.	Virola	guatemalensis	Myristicaceae	Mesoamerica	Mexico	Chiapas	Peltalcingo,	slope of Ahk’ulbal Nab above Peltalcingo	1700 m	1700		m	17°10'41"N 092°24'20"W			1981-02-27	27	2	1981				Tree 100 ft	MEXU*	2018	D. Santamaría-Aguilar
T. Wendt, E. Lott & I. Navarrete	3235		Virola guatemalensis	Virola guatemalensis (Hemsl.) Warb.	Virola	guatemalensis	Myristicaceae	Mesoamerica	Mexico	Oaxaca	Matías Romero Avendaño	± 11 Km. al S de Aserradero La Floresta, ± 24 Km. al S de Esmeralda, lomas al S del Río Verde	300 m	300		m	17°00'N 094°48'W			24-apr-1981	24	4	1981					MEXU*	2018	D. Santamaría-Aguilar
S. W. Brewer	178		Virola koschnyi	Virola koschnyi Warb.	Virola	koschnyi	Myristicaceae	Mesoamerica	Belize	Toledo		In the lowlands of the northeastern Bladen Nature Reserve, 20 m from the Bladen River.	45 m	45		m	16°33'N 088°43'W	16.55	-88.7167	1997-02-27	27	2	1997				Emergent tree 70 cm dbh. Bark red-brown. Leaves not fully expanded. Field collected in isopropyl alcohol (70%).	MO	2018	D. Santamaría-Aguilar
P. H. Gentle	3347		Virola koschnyi	Virola koschnyi Warb.	Virola	koschnyi	Myristicaceae	Mesoamerica	Belize	Stann Creek		Stann Creek Valley, Big Eddy Ridge. In high ridge	50 - 200 m	50	200	m	16°58'20"N 088°26'29"W	16.9722	-88.4414	1940-05-21	21	5	1940				Black banak Tree, 14 inch diameter.	MO	2018	D. Santamaría-Aguilar
A. H. Gentry	8472		Virola koschnyi	Virola koschnyi Warb.	Virola	koschnyi	Myristicaceae	Mesoamerica	Belize	Cayo		South of Belmopan, Mile 28-29 on Hummingbird Highway. Premontane wet forest	200 - 300 ft	200	300	f	17°04'N 088°36'W	17.0667	-88.6	1973-06-21	21	6	1973				Large canopy tree felled for timber; fruits brown.	MO	2018	D. Santamaría-Aguilar
W. A. Schipp	949		Virola koschnyi	Virola koschnyi Warb.	Virola	koschnyi	Myristicaceae	Mesoamerica	Belize			22 Mile Stann Creek Valley.	200 ft	200		f				1932-06-27	27	6	1932				One of the talles of forest trees. Known locally as "Banak." A fine wood for indoor work. Fruits brown. 80 feet, 3 foot diameter.	MO	2018	D. Santamaría-Aguilar
P. H. Gentle	3277		Virola koschnyi	Virola koschnyi Warb.	Virola	koschnyi	Myristicaceae	Mesoamerica	Belize	Stann Creek		Stann Creek Valley. Mountain Cow Ridge. In high ridge	200 m	200		m	16°57'07"N 088°26'07"W	16.9519	-88.4353	1940-03-25	25	3	1940				Banak tree, 10 inch diameter.	MO	2018	D. Santamaría-Aguilar
T. B. Croat	24562		Virola koschnyi	Virola koschnyi Warb.	Virola	koschnyi	Myristicaceae	Mesoamerica	Belize	Cayo		Forest along highway at mile 28.5 on Hummingbird Highway, south of Belmopan. Roadside and fresly logged forest.	200 - 300 ft	200	300	f	17°04'22"N 088°35'58"W	17.0728	-88.5994	14 Jun 1973 - 21 Jun 1973	14	6	1973	21	6	1973	Tree 28 meters; fruits greenish-brown sub globose, immature, trunk ca 75 centimeters dbh; used for lumber; sap reddish.	MO	2018	D. Santamaría-Aguilar
G. Davidse	36211		Virola koschnyi	Virola koschnyi Warb.	Virola	koschnyi	Myristicaceae	Mesoamerica	Belize	Toledo		Southern Maya Mountains, Bladen Nature Reserve, "AC Camp" along unnamed tributary of the upper Bladen Branch, ca. 0.5 km N of Bladen Branch and ca. 1 km SW of Ek Xux archeological site.	250 m	250		m	16°29'44"N 088°54'47"W	16.4956	-88.9131	1996-05-23	23	5	1996				Tree 20 m; fruit green.	MO	2018	D. Santamaría-Aguilar
Bruce K. Holst	5809		Virola koschnyi	Virola koschnyi Warb.	Virola	koschnyi	Myristicaceae	Mesoamerica	Belize	Toledo		Columbia River Forest Reserve: Little Quartz Ridge, base of slopes on southern flank, vicinity of Camp 2.	700 - 750 m	700	750	m	16°23'17"N 089°05'30"W	16.3881	-89.0917	1997-02-17	17	2	1997				Tree 18 m, ca. 15 cm dbh; sap red. Plants field-collected in 70% isopropyl alcohol.	MO	2018	D. Santamaría-Aguilar
Freddy A. Quesada, José Á. González R. & Roberto Espinoza	577		Virola koschnyi	Virola koschnyi Warb.	Virola	koschnyi	Myristicaceae	Mesoamerica	Costa Rica	Alajuela	Upala	No protegida. Cuenca del Pizote. Finca San Gerardo. San Cristóbal.	600 m	600		m	10°52'37"N 085°23'59"W	10.877	-85.3998	1998-02-20	20	2	1998				Árbol de 15 m. Inflorescencia pardo. Flores pardas.	USJ	2018	D. Santamaría-Aguilar						2006
U. Chavarría	1918		Virola koschnyi	Virola koschnyi Warb.	Virola	koschnyi	Myristicaceae	Mesoamerica	Costa Rica	Limón	Talamanca	R.V.S. Gandoca-Manzanillo. Caribe Sur. Sendero Cerillo.	1 m	1		m	09°36'26"N 082°37'18"W	9.60722	-82.6217	1999-03-03	3	3	1999				Arbol de 20 m DAP x 45 cm, frutos café-rojizo, árilo rojo.	CR-2 sheets, MO	2018	D. Santamaría-Aguilar
W. D. Stevens	23768		Virola koschnyi	Virola koschnyi Warb.	Virola	koschnyi	Myristicaceae	Mesoamerica	Costa Rica	Limón		Cerro Coronel, E of Laguna Danto; tall evergreen forest on gentle to moderately steep slopes.	20 - 170 m	20	170	m	10°41'N 083°38'W	10.6833	-83.6333	16 January 1986 - 23 January 1986	16	1	1986	23	1	1986	Tree 40 m tall, ca 8 dm dbh, trunk straight and unbranched, bark red-brown, open flowers pale yellow.	CR, MO	2018	D. Santamaría-Aguilar
W. D. Stevens & O.M. Montiel	24536		Virola koschnyi	Virola koschnyi Warb.	Virola	koschnyi	Myristicaceae	Mesoamerica	Costa Rica	Limón		Cerro Coronel, E of Laguna Danto; tall evergreen forest on gentle to moderately steep slopes.	20 - 170 m	20	170	m	10°41'N 083°38'W	10.6833	-83.6333	15 September 1986 - 20 September 1986	15	9	1986	20	9	1986	Tree 6 m tall, "fruta dorada".	MO	2018	D. Santamaría-Aguilar
M. H. Grayum, B. McLarney, F. Field & S. Ervin	8004		Virola koschnyi	Virola koschnyi Warb.	Virola	koschnyi	Myristicaceae	Mesoamerica	Costa Rica	Limón		Sixaola Forests between headwaters of Quebrada Mata de Limón and ("Crique Azul") Quebrada Quiebra Caña, Finca Anai	20 m	20		m	09°33'36"N 082°39'36"W	9.56	-82.66	1987-01-27	27	1	1987				Canopy tree in primary forest along "Crique Azul." Frts. yellow-orange, the aril rose-red.	CR, MO	2018	D. Santamaría-Aguilar
F. Araya	197		Virola koschnyi	Virola koschnyi Warb.	Virola	koschnyi	Myristicaceae	Mesoamerica	Costa Rica	Heredia	Sarapiqui	Llanura de San Carlos, Los Arbolitos, al norte de Puerto Viejo, 4 km aguas arriba unión Ríos Toro y Sarapiquí	20 m	20		m	10°38'24"N 084°00'00"W	10.64	-84	1993-03-15	15	3	1993				Árbol de 25 m. Inflorescencia en botones amarillo fuerte.	CR-2 sheets, LSU, MO	2018	D. Santamaría-Aguilar
R. Robles	1587		Virola koschnyi	Virola koschnyi Warb.	Virola	koschnyi	Myristicaceae	Mesoamerica	Costa Rica	Limón		Parque Nacional Tortuguero. Estación Agua Fría: rumbo Noreste, a orillas del Río Agua Fría.	40 m	40		m	10°27'N 083°34'W	10.45	-83.5667	1988-02-02	2	2	1988				Árbol de 25 m. Exudado rojizo. Frutos amarillos con un arilo rojo. Nombre vernáculo: Fruta dorada o Achiotillo.	CR, MO	2018	D. Santamaría-Aguilar
J. C. Solomon	2480		Virola koschnyi	Virola koschnyi Warb.	Virola	koschnyi	Myristicaceae	Mesoamerica	Costa Rica	Heredia		Finca La Selva, ca. 4 km SE of Puerto Viejo. Collected by H. Rodríguez.	50 m	50		m	10°28'N 084°00'W	10.4667	-84	1976-07-21	21	7	1976				Tree, ± 30 m. Aril bright red.	MO	2018	D. Santamaría-Aguilar
A. H. Gentry & R. Ortiz	78591		Virola koschnyi	Virola koschnyi Warb.	Virola	koschnyi	Myristicaceae	Mesoamerica	Costa Rica	Heredia	Sarapiqui	La Selva, Río Sarapiquí near Puerto Viejo, tropical wet forest, junction SSO and LOC Trails, Transect 6	100 m	100		m	10°26'N 084°01'W	10.4333	-84.0167	1993-01-07	7	1	1993				Tree 24 cm DBH, sterile.	MO	2018	D. Santamaría-Aguilar
B. E. Hammel	9673		Virola koschnyi	Virola koschnyi Warb.	Virola	koschnyi	Myristicaceae	Mesoamerica	Costa Rica	Heredia		Finca La Selva, the OTS field station on the Río Puerto Viejo just E of its junction with the Río Sarapiquí.	100 m	100		m	10°25'53"N 084°00'13"W	10.4314	-84.0036	1980-09-02	2	9	1980				Tree 30 m tall, pubescence rusty, flowers tan orange. Beginning of West River Road. Just past pejibaye grove.		2018	D. Santamaría-Aguilar
B. E. Hammel & J. Trainer	10834		Virola koschnyi	Virola koschnyi Warb.	Virola	koschnyi	Myristicaceae	Mesoamerica	Costa Rica	Heredia		Finca La Selva, the OTS field station on the Río Puerto Viejo just E of its junction with the Río Sarapiquí.	100 m	100		m	10°25'53"N 084°00'13"W	10.4314	-84.0036	1981-06-08	8	6	1981				West River Road 600 m E. Tree 25 m tall, fruits and seeds globose.	CR	2018	D. Santamaría-Aguilar
B. E. Hammel & J. Trainer	10835		Virola koschnyi	Virola koschnyi Warb.	Virola	koschnyi	Myristicaceae	Mesoamerica	Costa Rica	Heredia		Finca La Selva, the OTS field station on the Río Puerto Viejo just E of its junction with the Río Sarapiquí.	100 m	100		m	10°25'53"N 084°00'13"W	10.4314	-84.0036	1981-06-08	8	6	1981				Tree 26 m tall; fruits, seeds elongate ellipsoid.	MO	2018	D. Santamaría-Aguilar
R. Aguilar	RA007600		Virola koschnyi	Virola koschnyi Warb.	Virola	koschnyi	Myristicaceae	Mesoamerica	Costa Rica	Heredia	Sarapiqui	La Selva Biological Station. Jardines del comedor	100 m	100		m	10°25'53"N 084°00'13"W	10.4314	-84.0036	2003-02-13	13	2	2003				Arbol, alt. 20m., 25cm. DAP, Frutos amarillos, semillas de color cafe con arilo rojo.		2018	D. Santamaría-Aguilar
J. P. Folsom	9791		Virola koschnyi	Virola koschnyi Warb.	Virola	koschnyi	Myristicaceae	Mesoamerica	Costa Rica	Heredia		La Selva Biological Station.	100 m	100		m	10°25'53"N 084°00'13"W	10.4314	-84.0036	1981-04-18	18	4	1981				Large pasture tree, 80 cm dbh; fruit yellow-golden; aril red.	MO	2018	D. Santamaría-Aguilar
M. K. Whitson	318		Virola koschnyi	Virola koschnyi Warb.	Virola	koschnyi	Myristicaceae	Mesoamerica	Costa Rica	Heredia	Sarapiqui	La Selva Biological Station.	100 m	100		m	10°25'53"N 084°00'13"W	10.4314	-84.0036	1995-06-27	27	6	1995						2018	D. Santamaría-Aguilar
R. W. Lent	2324		Virola koschnyi	Virola koschnyi Warb.	Virola	koschnyi	Myristicaceae	Mesoamerica	Costa Rica	Heredia	Sarapiqui	Primary forest, Istarú Farm, Tirimbina	220 m	220		m	10°23'24"N 084°06'00"W	10.39	-84.1	1972-01-21	21	1	1972				Tree of 30 m. Flowers cream	CR-3 sheets, MO	2018	D. Santamaría-Aguilar
R. W. Lent	2143		Virola koschnyi	Virola koschnyi Warb.	Virola	koschnyi	Myristicaceae	Mesoamerica	Costa Rica	Heredia	Sarapiqui	Primary forest, Istarú Farm, Tirimbina, Sarapiquí	220 m	220		m	10°23'24"N 084°06'00"W	10.39	-84.1	1971-09-17	17	9	1971				Tree of approx. 35 m. Fruit brown.	CR, MO	2018	D. Santamaría-Aguilar
R. E. Gereau, A. Chacón & C. M. Taylor	3455		Virola koschnyi	Virola koschnyi Warb.	Virola	koschnyi	Myristicaceae	Mesoamerica	Costa Rica	Guanacaste		Cantón de Santa Cruz Road from Santa Cecilia to La Esperanza, wet forest remnants in quebrada at edge of field.	340 m	340		m	11°03'00"N 085°24'00"W	11.05	-85.4	1989-12-29	29	12	1989				Tree 16 m × 45 cm dbh. Fruit apricot orange.	CR, MO	2018	D. Santamaría-Aguilar
G. Rivera	1140		Virola koschnyi	Virola koschnyi Warb.	Virola	koschnyi	Myristicaceae	Mesoamerica	Costa Rica	Guanacaste		P. Nac. Rincón de la Vieja Colecta en camino a San Jorge, 3 Km. de La Casona Santa María.	400 m	400		m	10°40'12"N 085°17'52"W	10.67	-85.2978	1991-03-12	12	3	1991				Arbol de 15 m x 40 cm DAP. Flores café claro con pubescencia ferrugínea por el envés.	MO	2018	D. Santamaría-Aguilar
L. D. Gómez, I. Chacón & G. Herrera	22725		Virola koschnyi	Virola koschnyi Warb.	Virola	koschnyi	Myristicaceae	Mesoamerica	Costa Rica	Limón		Path from Río Sucio to González farm. Braulio Carrillo.	400 - 600 m	400	600	m				1984-05-01		5	1984				Tree 25 m, DBH 40 cm. Fruit rusty brownish green.	MO	2018	D. Santamaría-Aguilar
M. H. Grayum, G. Herrera & R. Robles	8692		Virola koschnyi	Virola koschnyi Warb.	Virola	koschnyi	Myristicaceae	Mesoamerica	Costa Rica	Limón		Cordillera de Talamanca. Ridge separating Río Madre de Dios from Quebrada Cañabral, and slope leading down to former.	440 - 460 m	440	460	m	10°02'N 083°26'W	10.0333	-83.4333	1988-09-02	2	9	1988				Tree ca. 14 m tall in pasture. Adult lvs. subcoriaceous, semiglossy and dark green above (the midrib paler), whitish below. Fls. (female) beige.	CR, MO, USJ	2018	D. Santamaría-Aguilar
M. Ballestero	72		Virola koschnyi	Virola koschnyi Warb.	Virola	koschnyi	Myristicaceae	Mesoamerica	Costa Rica	Heredia	Sarapiqui	Parque Nacional Braulio Carrillo, bosque primario frente al Puesto La Ceiba	450 m	450		m	10°19'47"N 084°04'48"W	10.3297	-84.08	1988-12-23	23	12	1988				Árbol de 24 m × 80 cm DAP. Copa con ramas extendidas. Tronco cilíndrico. Hojas verde oscuro con el envés pubescente café-rojizo. Flores con pétalos amarillos.	CR, MO	2018	D. Santamaría-Aguilar
R. Aguilar	9		Virola koschnyi	Virola koschnyi Warb.	Virola	koschnyi	Myristicaceae	Mesoamerica	Costa Rica	Heredia	Sarapiqui	Parque Nacional Braulio Carrillo, Estación El Ceibo	500 - 600 m	500	600	m	10°22'29"N 084°02'10"W	10.3747	-84.0361	1989-10-01	1	10	1989				Árbol de 17 m × 40 cm DAP. Corteza lisa. Inflorescencia café. Flores amarillas.	MO, LSU, USJ	2018	D. Santamaría-Aguilar
G. Herrera	1092		Virola koschnyi	Virola koschnyi Warb.	Virola	koschnyi	Myristicaceae	Mesoamerica	Costa Rica	Alajuela	Upala	Dos Ríos. Área de bosque 1 Km antes de Río Pizote siguiendo el camino de Dos Ríos a Brasilia.	500 m	500		m	10°55'N 085°20'W	10.9167	-85.3333	1987-11-02	2	11	1987				Árbol de 20 m × 45 cm DAP. Con secreción acuosa en los pecíolos. Hojas de envés ferrugíneo. Frutos inmaduros de pubescencia ferrugínea.	CR, MO	2018	D. Santamaría-Aguilar
L. Acosta, L. D. Vargas & V. H. Ramírez	111		Virola koschnyi	Virola koschnyi Warb.	Virola	koschnyi	Myristicaceae	Mesoamerica	Costa Rica	Limón	Pococí	No protegida. Cuenca del Sarapiquí. Finca Bosque Lluvioso.	500 m	500		m	10°11'52"N 083°51'24"W	10.1978	-83.8567	1999-11-16	16	11	1999				Arbolito de 2.5 m. Infértil.	CR, MO	2018	D. Santamaría-Aguilar
B. Boyle	1424		Virola koschnyi	Virola koschnyi Warb.	Virola	koschnyi	Myristicaceae	Mesoamerica	Costa Rica	Heredia	Sarapiqui	Parque Nacional Braulio Carrillo, Puesto El Ceibo, gently sloping area just above the steep rim of the Río Peje gorge on the west side, along side path that goes from guard house to water supply intake, about 15 minutes uphill.	520 m	520		m	10°19'58"N 084°04'44"W	10.3328	-84.0789	1992-12-09	9	12	1992				Tree, 19.1 cm dbh. Midrib and young twigs with orange-rufescent pubescence. Clear sap from trunk slash and twigs. Spicey-nutmeg smell.	MO	2018	D. Santamaría-Aguilar
F. A. Quesada	243		Virola koschnyi	Virola koschnyi Warb.	Virola	koschnyi	Myristicaceae	Mesoamerica	Costa Rica	Alajuela	Upala	Parque Nacional Guanacaste, Cordillera de Guanacaste, Estación San Ramón, Dos Ríos, Sendero El Níspero	550 m	550		m	10°52'48"N 085°24'00"W	10.88	-85.4	1995-01-27	27	1	1995				Árbol de 10 m × 30 cm DAP. Frutos pardos.	CR, LSU, MO	2018	D. Santamaría-Aguilar
G. Rivera	1399		Virola koschnyi	Virola koschnyi Warb.	Virola	koschnyi	Myristicaceae	Mesoamerica	Costa Rica	Guanacaste		P. Nac. Rincón de la Vieja Quebrada Rancho Grande, 2 Km aguas abajo y Finca Los Moras.	700 m	700		m	10°46'12"N 085°15'36"W	10.77	-85.26	1991-06-20	20	6	1991				Arbol de 12 m x 35 cm DAP. Frutos amarillentos, semilla blanca, arilo rojizo.	MO	2018	D. Santamaría-Aguilar
P. Ríos	309		Virola koschnyi	Virola koschnyi Warb.	Virola	koschnyi	Myristicaceae	Mesoamerica	Costa Rica	Guanacaste		Parque Nacional Guanacaste. Estacion Pitilla. Fila Orosilito y Sendero El Mismo.	700 m	700		m	10°59'26"N 085°25'40"W	10.9906	-85.4278	1991-03-02	2	3	1991				Árbol de 20 m × 30 cm DAP. Flores amarillas.	CR	2018	D. Santamaría-Aguilar
W. A. Dayton & W. R. Barbour	3003		Virola koschnyi	Virola koschnyi Warb.	Virola	koschnyi	Myristicaceae	Mesoamerica	Costa Rica	Limón		Hill above Las Palomas. Soil: Volcanic loam. Forest type: Rain for.	750 ft	750		f				1943-05-06	6	5	1943				Fruta dorada.	CR, MO	2018	D. Santamaría-Aguilar
G. Herrera	1607		Virola koschnyi	Virola koschnyi Warb.	Virola	koschnyi	Myristicaceae	Mesoamerica	Costa Rica	Alajuela	Upala	Parque Rincón de La Vieja. Puesto Santa María, del mirador por la fila hasta el sesteo de la danta, bajando hasta el canal.	900 - 1000 m	900	1000	m	10°46'N 085°18'W	10.7667	-85.3	1988-03-07	7	3	1988				Árbol de 20 m o más × 50 cm DAP. Corteza blancuzca. Follaje juvenil de envés con pubescencia ferrugínea. Inflorescencia ferrugínea. Flores amarillas, estigma verde-amarillento, ovario amarillo.	CR, MO	2018	D. Santamaría-Aguilar
G. Rivera	1602		Virola koschnyi	Virola koschnyi Warb.	Virola	koschnyi	Myristicaceae	Mesoamerica	Costa Rica	Guanacaste		P. Nac. Rincón de la Vieja Quebrada Rancho Grande, aguas arriba de la represa.	1000 m	1000		m	10°47'00"N 085°17'00"W	10.7833	-85.2833	1991-09-06	6	9	1991				Arbol de 35 m x 80 cm dAP. Frutos anaranjados, semilla negra, arilo rojo. Látex rojizo.	CR	2018	D. Santamaría-Aguilar
J. H. Beach	1453		Virola koschnyi	Virola koschnyi Warb.	Virola	koschnyi	Myristicaceae	Mesoamerica	Costa Rica	Heredia	Sarapiqui	Puerto Viejo de Sarapiquí, Organization for Tropical Studies, Finca La Selva, pre-montane wet forest					10°25'12"N 084°01'12"W	10.42	-84.02	1979-07-01	1	7	1979				Tree growing in pejibaye grove. Flowers gold-yellow.	CR, MO	2018	D. Santamaría-Aguilar
John Sperry	653		Virola koschnyi	Virola koschnyi Warb.	Virola	koschnyi	Myristicaceae	Mesoamerica	Costa Rica	Heredia	Sarapiqui	Finca La Selva. Puerto Viejo de Sarapiquí. In pejibaye grove, clearing.				m	10°25'52"N 084°00'13"W	10.4311	-84.0036	1979-06-28	28	6	1979				Canopy tree.	MO	2018	D. Santamaría-Aguilar
C. Vaughan	93		Virola koschnyi	Virola koschnyi Warb.	Virola	koschnyi	Myristicaceae	Mesoamerica	Costa Rica	Cartago	Turrialba	CATIE	650 m	650		m	09°53'24"N, 083°39'00"W			1975-02-08	8	2	1975				Arbol 12 metros de altura.	USJ	2018	D. Santamaría-Aguilar
R. Ramalho	7990		Virola koschnyi	Virola koschnyi Warb.	Virola	koschnyi	Myristicaceae	Mesoamerica	Costa Rica	Cartago	Turrialba	Bosque de Florencia de Turrialba	650 m	650		m	09°52'12"N, 083°40'12"W			1969-07-31	31	7	1969				Arbol colectado en bosque.	USJ	2018	D. Santamaría-Aguilar
R. Ocampo	2582		Virola koschnyi	Virola koschnyi Warb.	Virola	koschnyi	Myristicaceae	Mesoamerica	Costa Rica	Limon		Río Peje.	380 m	380		m	09°57'54"N, 083°15'10"W			1979-06-14	14	6	1979					CR	2018	D. Santamaría-Aguilar
K. Soels	3942		Virola koschnyi	Virola koschnyi Warb.	Virola	koschnyi	Myristicaceae	Mesoamerica	Costa Rica	Limón		Cariari de Pococi	40 m	40		m				5-apr-1967	5	4	1967				Arbol 39 m. de altura, DAP 30 cm; frutos de color verde, con exudación roja viscosa. Fruta dorada.	USJ	2018	D. Santamaría-Aguilar
K. Soels	4870		Virola koschnyi	Virola koschnyi Warb.	Virola	koschnyi	Myristicaceae	Mesoamerica	Costa Rica														1967				Arbol con frutos de color verde con exudadación roja viscosa, pero no abundante. Madera para plywood de construcción. DAP 70 cm.	USJ	2018	D. Santamaría-Aguilar
R. Menjivar & E. Flores	s.n. (039585)		Virola koschnyi	Virola koschnyi Warb.	Virola	koschnyi	Myristicaceae	Mesoamerica	Costa Rica	Heredia	Sarapiqui	Estación Biológica La Selva.	39 m	39		m				1992-03-27	27	3	1992					USJ	2018	D. Santamaría-Aguilar
J. F. Morales	764		Virola koschnyi	Virola koschnyi Warb.	Virola	koschnyi	Myristicaceae	Mesoamerica	costa Rica	San José	Puriscal	P.N. La Cangreja. Santa Rosa, bosque primario en parches remanentes.	350 m	350		m	09°42'10"N 084°23'50"W			1992-10-01	1	10	1992				Arbol de 30m x 44cm DAP. Frutos marrón, semillas amarillas, arilo rojo	CR	2018
E. Contreras	8790		Virola koschnyi	Virola koschnyi Warb.	Virola	koschnyi	Myristicaceae	Mesoamerica	Guatemala	Petén		La Cumbre, on Cadenas Road, west of Km 143.	300 m	300		m	16°04'52"N 089°21'03"W	16.0811	-89.3508	1969-07-30	30	7	1969				Tree 150 ft high, 35 in diam, fruit orange. In high forest	MEXU*, MO	2018	D. Santamaría-Aguilar
P. Tenorio, E. M. Martínez, H. Droege & A. N. Díaz	14953		Virola koschnyi	Virola koschnyi Warb.	Virola	koschnyi	Myristicaceae	Mesoamerica	Guatemala	Izabal	Livingston	Creek Jute, Biotopo Chocón Machacas.					15°47'22"N 088°51'58"W	15.7894	-88.8661	1988-07-28	28	7	1988				Árbol de 25 m, frutos inmaduros, abundante.	MEXU*, MO	2018	D. Santamaría-Aguilar
E. Contreras	6924		Virola koschnyi	Virola koschnyi Warb.	Virola	koschnyi	Myristicaceae	Mesoamerica	Guatemala	Petén		Chinchila, Sebol Road. In high forest					16°07'29"N 089°27'01"W	16.1247	-89.4503	1967-05-16	16	5	1967				Tree 60 ft high, 12 in. diam., fruit greenish	MO	2018	D. Santamaría-Aguilar
E. Contreras	10751		Virola koschnyi	Virola koschnyi Warb.	Virola	koschnyi	Myristicaceae	Mesoamerica	Guatemala	Izabal		Between Sejá and Fronteras, on Petén-Guatemala road. In high forest, in zapotal					15°40'08"N 089°01'28"W	15.6689	-89.0244	1971-05-08	8	5	1971				Tree, 120 feet, 40 inch diameter, flowers white.	MO	2018	D. Santamaría-Aguilar
G. Davidse & R. W. Pohl	2178		Virola koschnyi	Virola koschnyi Warb.	Virola	koschnyi	Myristicaceae	Mesoamerica	Honduras	Atlántida	Tela	Lancetilla S of Tela; wet, broadleaf of forest.	20 - 50 m	20	50	m	15°44'00"N 087°27'01"W	15.7333	-87.4503	1970-06-25	25	6	1970				Local name "Sangre de montãna." Large canopy tree.	MO	2018	D. Santamaría-Aguilar
P. R. House	2346		Virola koschnyi	Virola koschnyi Warb.	Virola	koschnyi	Myristicaceae	Mesoamerica	Honduras	Gracias a Dios		20 min al norte de Krausirpe, Río Patuca. Bosque secundario	90 m	90		m	15°03'N 084°50'W	15.05	-84.8333	1995-03-24	24	3	1995				Arbol de 30 m	MO	2018	D. Santamaría-Aguilar
P. R. House	1933		Virola koschnyi	Virola koschnyi Warb.	Virola	koschnyi	Myristicaceae	Mesoamerica	Honduras	Gracias a Dios		40 mins al norte de Krausirpe. Transecto Botanico.	90 m	90		m	15°03'N 084°50'W	15.05	-84.8333	1994-02-25	25	2	1994				Árbol de 30 m. "Banak." Para mal de boca y para granos se utiliza la leche. Para hacer pipante.	MO	2018	D. Santamaría-Aguilar
C. H. Nelson & G. Cruz	9484		Virola koschnyi	Virola koschnyi Warb.	Virola	koschnyi	Myristicaceae	Mesoamerica	Honduras	Gracias a Dios	Puerto Lempira	Ahuas Bila [Auasbila], 200 km SO de Puerto Lempira, orilla del río Wankí, Coco o Segovia, La Mosquitia.	100 m	100		m	14°46'N 084°45'W	14.7667	-84.75	05 mayo 1985 - 13 mayo 1985	5	5	1985	13	5	1985	Arbol 50 m.	MO	2018	D. Santamaría-Aguilar
N. Zamora	1844		Virola koschnyi	Virola koschnyi Warb.	Virola	koschnyi	Myristicaceae	Mesoamerica	Honduras	Atlántida	La Ceiba	Liberia.	150 m	150		m	15°40'00"N 086°50'00"W	15.6667	-86.8333	1992-06-02	2	6	1992				Árbol de 25 m x 40 cm DAP. Tronco derecho, cilíndrico. Frutos abundantes, verde amarillentos. Nombre vernacular: Sangre.	CR, MO	2018	D. Santamaría-Aguilar
A. Meras	2		Virola koschnyi	Virola koschnyi Warb.	Virola	koschnyi	Myristicaceae	Mesoamerica	Honduras	Olancho	San Esteban	Montaña el Carbon, aldea el Carbon.	460 m	460		m				1994-02-02	2	2	1994				Fuste recto, chaflan rojo claro hoja oblonga, con pubescencia en el envéz. N.v.: Sangre real.	MO	2018	D. Santamaría-Aguilar
P. H. Allen	6456		Virola koschnyi	Virola koschnyi Warb.	Virola	koschnyi	Myristicaceae	Mesoamerica	Honduras	Cortés	Santa Cruz de Yojoa	Agua Azul	660 m	660		m	14°53'56"N, 087°56'49"W			1952-02-13	13	2	1952					GH, EAP-2 sheets	2018	D. Santamaría-Aguilar
I. Rivas	08-C1		Virola koschnyi	Virola koschnyi Warb.	Virola	koschnyi	Myristicaceae	Mesoamerica	Honduras	Olancho		A 3 km comunidad El Carbón	430 m	430		m	15°26'30"N 085°34'49"W			1997-03-12	12	3	1997					EAP*	2018	D. Santamaría-Aguilar
S. Sinaca	1903		Virola koschnyi	Virola koschnyi Warb.	Virola	koschnyi	Myristicaceae	Mesoamerica	Mexico	Chiapas	Ocosingo	2.5 km NE de la Estación de Chajul.	160 m	160		m	18°25'00"N 095°05'00"W - 18°35'00"N 095°15'00"W	18.4167	-95.0833	1993-09-05	5	9	1993				Plántula con semillas café.	MEXU, MO	2018	D. Santamaría-Aguilar
E. Martínez S. & C. H. Ramos	26336		Virola koschnyi	Virola koschnyi Warb.	Virola	koschnyi	Myristicaceae	Mesoamerica	Mexico	Chiapas	Ocosingo	En ejido Chajul, en Cacaotal.	150 m	150		m	16°04'48"N 090°52'12"W			1993-03-17	17	3	1993				Arbol 30 m. Flores amarillentas	MEXU-3 sheets*	2018	D. Santamaría-Aguilar
G. Domínguez Vázquez	438		Virola koschnyi	Virola koschnyi Warb.	Virola	koschnyi	Myristicaceae	Mesoamerica	Mexico			Boca de Chajul; 800 m. al SE del poblado	350 m	350		m	16.117°N 90.917°W			1992-05-21	21	5	1992				Arbol 30 m. Hojas simples alternas, oblongas, coriaceas, envés claro con pelos estrellados rojizos, nervadura amarillo pubescente; racimos axilares, cápsulas café amarillentas, pubescentes.	MEXU*	2018	D. Santamaría-Aguilar
G. Domínguez Vázquez	651		Virola koschnyi	Virola koschnyi Warb.	Virola	koschnyi	Myristicaceae	Mesoamerica	Mexico	Chiapas	Ocosingo	Boca de Chajul SO del poblado 1 km	350 m	350		m	16.117°N, 90.917°W			1993-03-17	17	3	1993				Arbol 30 m. Latex rojo. Hojas, flores y ramillas ferrugíneas estrellado pilosas; hojas simples, aromáticas, coriáceas; panículas supra axilares; flores amarillas, aromáticas.	MEXU*	2018	D. Santamaría-Aguilar
E. L. Little	25423		Virola koschnyi	Virola koschnyi Warb.	Virola	koschnyi	Myristicaceae	Mesoamerica	Nicaragua	Atlántico Norte		Alamicamba, Río Prinzapolka; bosque de galeria	20 m	20		m	13°29'N 084°14'W	13.4833	-84.2333	17 Abr. 1971	17	4	1971					MO	2018	D. Santamaría-Aguilar
R.M. Rueda & H. Mendoza	17069		Virola koschnyi	Virola koschnyi Warb.	Virola	koschnyi	Myristicaceae	Mesoamerica	Nicaragua	Río San Juan		Municipio de San Juan del Norte, Reserva Indio-Maíz, Río Caño Negro, lugar Los Encuentros, en la boca del Caño Los Cedros	30 m	30		m	10°59'N 083°58'W	10.9833	-83.9667	2002-05-18	18	5	2002				Arbol 40 m, frutos amarillos.	MO	2018	D. Santamaría-Aguilar
E. L. Little	25164		Virola koschnyi	Virola koschnyi Warb.	Virola	koschnyi	Myristicaceae	Mesoamerica	Nicaragua	Atlántico Norte		Sur de Río Wawa, 60 km NO de Puerto Cabezas.	40 m	40		m	14°19'N 083°56'W	14.3167	-83.9333	15 March 1971 - 17 March 1971	15	3	1971	17	3	1971		MO	2018	D. Santamaría-Aguilar
C. Aker & et al.	624		Virola koschnyi	Virola koschnyi Warb.	Virola	koschnyi	Myristicaceae	Mesoamerica	Nicaragua	Atlántico Norte		Municipio de Bonanza, Territorio Mayangna Sauni-As-Musawas, Alrededor de la comunidad	50 - 150 m	50	150	m	14°06'59"N 084°43'49"W	14.1164	-84.7303	17 octubre 2002 - 22 octubre 2002	17	10	2002	22	10	2002	Arbol 25 m, flores blancas, frutos amarillos. N.C: Banak.	MO	2018	D. Santamaría-Aguilar
F.C. Englesing	190		Virola koschnyi	Virola koschnyi Warb.	Virola	koschnyi	Myristicaceae	Mesoamerica	Nicaragua	Atlántico Norte		On bank of brook flowing into Ocongwas River	50 m	50		m	13°58'00"N 084°15'30"W	13.9667	-84.2583	3 Apr 1928 - 6 Apr 1928	3	4	1928	6	4	1928			2018	D. Santamaría-Aguilar
E. L. Little & A. Delvié	25358		Virola koschnyi	Virola koschnyi Warb.	Virola	koschnyi	Myristicaceae	Mesoamerica	Nicaragua	Atlántico Norte		20 km O de Awas Tingni, sur de Río Wawa	50 m	50		m	14°21'N 084°07'W	14.35	-84.1167	31 Mar. 1971	31	3	1971	2	4	1971		MO	2018	D. Santamaría-Aguilar
J.C. Sandino	3440		Virola koschnyi	Virola koschnyi Warb.	Virola	koschnyi	Myristicaceae	Mesoamerica	Nicaragua	Atlántico Sur		1 km de Colonia Serrano, Río Serrano	70 - 80 m	70	80	m	11°34'N 084°22'W	11.5667	-84.3667	1982-07-31	31	7	1982				Arbol de 30 m de alto, pedúnculos y ramas pubescentes, flores café, maderable. n.c. "sebo"	MO	2018	D. Santamaría-Aguilar
J. J. Pipoly	7932		Virola koschnyi	Virola koschnyi Warb.	Virola	koschnyi	Myristicaceae	Mesoamerica	Nicaragua	Río San Juan		La Lupe, near Río Santa Cruz; lowland secondary moist forest on clay soils	80 - 120 m	80	120	m	11°08'N 084°22'W	11.1333	-84.3667	1 Dec. 1990	1	12	1990					MO	2018	D. Santamaría-Aguilar
P. P. Moreno	23042		Virola koschnyi	Virola koschnyi Warb.	Virola	koschnyi	Myristicaceae	Mesoamerica	Nicaragua	Río San Juan		Río Sábalos, 2 km al W de Santa Eduviges	80 m	80		m	11°03'N 084°29'W	11.05	-84.4833	1984-02-18	18	2	1984				Arbol, 25 m de alto, flores en yema, látex colorado, 60 cm diam. n.c. "cebo"	MO	2018	D. Santamaría-Aguilar
P. P. Moreno	23682		Virola koschnyi	Virola koschnyi Warb.	Virola	koschnyi	Myristicaceae	Mesoamerica	Nicaragua	Atlántico Sur		Kurinwacito	80 - 100 m	80	100	m	13°08'N 084°55'W	13.1333	-84.9167	18 marzo 1984 - 22 marzo 1984	18	3	1984	22	3	1984	Arbol, 50 m de alto, frutos café. n.c. "cebo"	MO	2018	D. Santamaría-Aguilar
P. P. Moreno	23701		Virola koschnyi	Virola koschnyi Warb.	Virola	koschnyi	Myristicaceae	Mesoamerica	Nicaragua	Atlántico Sur		Kurinwacito	80 - 100 m	80	100	m	13°08'N 084°55'W	13.1333	-84.9167	18 marzo 1984 - 22 marzo 1984	18	3	1984	22	3	1984	Arbol, 40 a 50 m de alto, 70 cm diam, frutos café. n.c. "cebo"	MO	2018	D. Santamaría-Aguilar
P. P. Moreno	23788		Virola koschnyi	Virola koschnyi Warb.	Virola	koschnyi	Myristicaceae	Mesoamerica	Nicaragua	Atlántico Sur		El Zacatón, entre Mesas Plan Helado y la laguna de Miraflor	1300-1400 m	1300	1400	m	13°14'00"N, 086°15'00"W	13.1333	-84.9167	18 marzo 1984 - 22 marzo 1984	18	3	1984	22	3	1984	Arbol, 40 m de alto, frutos café, látex claro. n.c. "cebo"	MO	2018	D. Santamaría-Aguilar
F. Ortíz	1257		Virola koschnyi	Virola koschnyi Warb.	Virola	koschnyi	Myristicaceae	Mesoamerica	Nicaragua	Atlántico Norte		Río Danlí	100 m	100		m	13°41'48"N 084°53'16"W	13.6967	-84.8878	1 abril 1983 - 30 abril 1983	1	4	1983	30	4	1983		MO	2018	D. Santamaría-Aguilar
W. Robleto	633		Virola koschnyi	Virola koschnyi Warb.	Virola	koschnyi	Myristicaceae	Mesoamerica	Nicaragua	Atlántico Sur		Municipio de Rama, Loma Buena Vista.	100 - 150 m	100	150	m	12°08'N 084°12'W	12.1333	-84.2	23 mayo 1984	23	5	1984				Arbol, aprox. 30 m de alto, aprox. 40 cm diámetro, muestra estéril. n.c. "cebo"	MO	2018	D. Santamaría-Aguilar
F. Ortíz	252		Virola koschnyi	Virola koschnyi Warb.	Virola	koschnyi	Myristicaceae	Mesoamerica	Nicaragua	Atlántico Norte		Municipio de Siuna, Waspado	100 - 200 m	100	200	m	13°41'N 084°54'W	13.6833	-84.9	6 octubre 1982	6	10	1982					MO	2018	D. Santamaría-Aguilar
R.M. Rueda, I. Coronado G., F. Flores & W. Velásquez	10319		Virola koschnyi	Virola koschnyi Warb.	Virola	koschnyi	Myristicaceae	Mesoamerica	Nicaragua	Río San Juan		Municipio de el Castillo, Reserva Indio-Maíz, zona de amortiguamiento, estación biológica La Lupe.	100 - 200 m	100	200	m	11°08'N 084°21'W	11.1333	-84.35	15 Marzo 1999	15	3	1999				Arbol 25 m; flores amarillentas.	MO	2018	D. Santamaría-Aguilar
R.M. Rueda, I. Coronado G., F. Flores & W. Velásquez	10385A		Virola koschnyi	Virola koschnyi Warb.	Virola	koschnyi	Myristicaceae	Mesoamerica	Nicaragua	Río San Juan		Municipio de el Castillo, Reserva Indio-Maíz, zona de amortiguamiento, estación biológica La Lupe.	100 - 200 m	100	200	m	11°08'N 084°21'W	11.1333	-84.35	16 Marzo 1999	16	3	1999					MO	2018	D. Santamaría-Aguilar
E. L. Little	25328		Virola koschnyi	Virola koschnyi Warb.	Virola	koschnyi	Myristicaceae	Mesoamerica	Nicaragua	Atlántico Norte		Francia Sirpi, 30 km SO de Waspán; bosque hidrofitico	100 m	100		m	14°28'N 084°03'W	14.4667	-84.05	23 Mar. 1971	23	3	1971	26	3	1971		MO	2018	D. Santamaría-Aguilar
J.C. Sandino	4808		Virola koschnyi	Virola koschnyi Warb.	Virola	koschnyi	Myristicaceae	Mesoamerica	Nicaragua	Atlántico Sur		El Zapote, 40 km NE de Nueva Guinea; Bosque tropical húmedo	130 - 150 m	130	150	m	11°49'N 084°23'W	11.8167	-84.3833	29 febrero 1984	29	2	1984				Arbol, 18 m de alto, 45 cm dap, savia roja, ramas, pecíolos y nervios puberulentos, inflorescencia en yemas amarillas. n.c. "sebo"	MO	2018	D. Santamaría-Aguilar
J.C. Sandino	4822		Virola koschnyi	Virola koschnyi Warb.	Virola	koschnyi	Myristicaceae	Mesoamerica	Nicaragua	Atlántico Sur		El Zapote, 40 km NE de Nueva Guinea; Bosque tropical húmedo	130 - 150 m	130	150	m	11°49'N 084°23'W	11.8167	-84.3833	1984-03-01	1	3	1984				Arbol, 25 m de alto, fuste comercial de 13 m, 55 cm dap. Ramificación monopo- dial verticilada, estéril. n.c. "sebo"	MO	2018	D. Santamaría-Aguilar
J.C. Sandino	4905		Virola koschnyi	Virola koschnyi Warb.	Virola	koschnyi	Myristicaceae	Mesoamerica	Nicaragua	Atlántico Sur		El Zapote, 40 km NE [S] de Nueva Guinea	150 m	150		m	11°32'N 084°26'W	11.5333	-84.4333	25 marzo 1984 - 31 marzo 1984	25	3	1984	31	3	1984	Arbol, 30 m de alto, 58 cm dap, corteza escamosa caediza en placas muy pequeñas. Savia copiosa de color rojo; frutos café, puberulentos. n.c. "sebo"	MO	2018	D. Santamaría-Aguilar
I. Coronado G., M. Barrios, G. Pérez & M. Mercado	1951		Virola koschnyi	Virola koschnyi Warb.	Virola	koschnyi	Myristicaceae	Mesoamerica	Nicaragua	Jinotega		Municipio del Cua Bocay, Reserva de Bosawas, comunidad de San Andrés, Caño Susumwas.	180 m	180		m	14°22'N 085°03'W	14.3667	-85.05	30 Junio 2005	30	6	2005				Arbol 18 m; frutos anaranjados. N.C.: Cebo. Uso: Construcción.	MO	2018	D. Santamaría-Aguilar
R.M. Rueda, P. E. Sánchez V. & A. Grijalva P.	7490		Virola koschnyi	Virola koschnyi Warb.	Virola	koschnyi	Myristicaceae	Mesoamerica	Nicaragua	Río San Juan		Municipio el Castillo, Estación Biológica La Lupe.	200 m	200		m	11°08'N 084°38'W	11.1333	-84.6333	27 octubre 1997	27	10	1997				Arbol 15 m, estéril. NC: fruta dorada.	MO	2018	D. Santamaría-Aguilar
J. S. Miller & J.C. Sandino	1110		Virola koschnyi	Virola koschnyi Warb.	Virola	koschnyi	Myristicaceae	Mesoamerica	Nicaragua	Atlántico Sur		Along road between Nueva Guinea and Verdún; Tropical wet forest	240 m	240		m	11°40'N 084°27'W	11.6667	-84.45	17 Aug. 1983	17	8	1983				Tree 20 m, fruit brown, sap red.	MO	2018	D. Santamaría-Aguilar
J.C. Sandino	4488		Virola koschnyi	Virola koschnyi Warb.	Virola	koschnyi	Myristicaceae	Mesoamerica	Nicaragua	Atlántico Sur		El Zapote, 6 km S de Colonia Verdún; bosque tropical húmemedo	250 - 300 m	250	300	m	11°34'N 084°24'W	11.5667	-84.4	17 agosto 1983	17	8	1983				Arbol 20 m de alto, 22" DAP, ramas y pecíolos pubescentes, fruto café pubescente. n.c. "sebo"	MO	2018	D. Santamaría-Aguilar
M. H. Nee & S. Vega	27896		Virola koschnyi	Virola koschnyi Warb.	Virola	koschnyi	Myristicaceae	Mesoamerica	Nicaragua	Atlántico Sur		Ca 1 km N of El Zapote, 6 km S of Colonia Verdún; forest remnants	250 - 300 m	250	300	m	11°34'N 084°24'W	11.5667	-84.4	1983-09-08	8	9	1983				Canopy tree. Sterile.	MO	2018	D. Santamaría-Aguilar
M. H. Nee & S. Vega	27912		Virola koschnyi	Virola koschnyi Warb.	Virola	koschnyi	Myristicaceae	Mesoamerica	Nicaragua	Atlántico Sur		Ca 1 km N of El Zapote, 6 km S of Colonia Verdún; forest remnants	250 - 300 m	250	300	m	11°34'N 084°24'W	11.5667	-84.4	1983-09-08	8	9	1983				Canopy tree. Inflorescence yellow.	MO	2018	D. Santamaría-Aguilar
I. Coronado G., M. Barrios, D. M. Griffith, A. Chain, D. Fernández & G. Pérez	3326		Virola koschnyi	Virola koschnyi Warb.	Virola	koschnyi	Myristicaceae	Mesoamerica	Nicaragua	Jinotega		Municipio de Wiwili, Reserva de Bosawas, comunidad de San Andrés, Río Coco; alrededor del Transecto 13, de cacería (Arilia tingni)	375 m	375		m	14°20'N 085°08'W	14.3333	-85.1333	2 Febrero 2006	2	2	2006				Árbol 25 m; yemas florales cafés. N.C.: Cebo.	MO	2018	D. Santamaría-Aguilar
A. Mejía	10		Virola koschnyi	Virola koschnyi Warb.	Virola	koschnyi	Myristicaceae	Mesoamerica	Nicaragua	Río San Juan		El Refugio de Vida Silvestre los Guatuzos. Santa Maria					11°28'N 084°45'W	11.4667	-84.75	1997			1997				Fruta Dorada. Arbol maderable con frutos dehiscentes redondos y semillas rojas	MO	2018	D. Santamaría-Aguilar
J. M. Ley-López	75		Virola laevigata	Virola laevigata Standl.	Virola	laevigata	Myristicaceae	Mesoamerica	Costa Rica	Puntarenas	Golfito	Jiménez, Piro, camino a Laguna Silvestre	[0 - 100 m]	0	100	m				2012-02-01	1	2	2012				Arbol de apro. 25 m de alto. Hojas con enves verde; frutos amarillos abundantes, arilo rojo, comido por monos	USJ	2018	D. Santamaría-Aguilar
N. Zamora & T. D. Pennington	1583		Virola laevigata	Virola laevigata Standl.	Virola	laevigata	Myristicaceae	Mesoamerica	Costa Rica	Puntarenas	Osa	Uvita, cerca de Dominical.	200 m	200		m	09°09'N 083°43'W	9.15	-83.7167	1991-01-28	28	1	1991				Árbol de 25 m × 35 cm DAP; tronco derecho, cilíndrico, corteza externa lisa parda, interna con excreción rojiza. Ramificación típicamente verticilada con ramas horizontales . Floración abundante, flores femeninas amarillentas con aroma tenue. Frecuente.	CR, MO	2018	D. Santamaría-Aguilar
R. Aguilar	2004		Virola laevigata	Virola laevigata Standl.	Virola	laevigata	Myristicaceae	Mesoamerica	Costa Rica	Puntarenas	Golfito	Península de Osa. Fila Carbonera, Cabo Matapalo.	300 m	300		m	08°24'00"N 083°18'30"W	8.4	-83.3083	1993-07-16	16	7	1993				Árbol de 9 m. Flores amarillo herrumbre.	CR, MO	2018	D. Santamaría-Aguilar
R. Aguilar	2490		Virola laevigata	Virola laevigata Standl.	Virola	laevigata	Myristicaceae	Mesoamerica	Costa Rica	Puntarenas	Golfito	P.N. Corcovado. Península de Osa. Estación Sirena. Sendero y alrededores.	10 m	10		m	08°28'00"N 083°35'00"W	8.46667	-83.5833	1993-10-12	12	10	1993				Árbol de 15 m × 40 cm DAP. Gambas poco pronunciadas de 50 cm. Corteza parda con savia algo rojiza. Fuste más o menos cilíndrico. Flores ferrugíneas. Frutos verde brillante, igual que el follaje.	CR-2 sheets, LSU, MO	2018	D. Santamaría-Aguilar
R. Aguilar	1585		Virola laevigata	Virola laevigata Standl.	Virola	laevigata	Myristicaceae	Mesoamerica	Costa Rica	Puntarenas	Golfito	Península de Osa. 1 Km antes de llegar a La Palma, camino a Puerto Jiménez.	8 m	8		m	08°39'00"N 083°27'00"W	8.65	-83.45	1993-01-16	16	1	1993				Árbol de 10 m × 35 cm DAP. Fuste más o menos rollizo con gambas pequeñas de 20 cm. Savia incolora oxida crema rojizo. Flores amarillo ferrugíneo.	CR-2 sheets, LSU, MO	2018	D. Santamaría-Aguilar
C. Kernan & G. Fonseca	1288		Virola laevigata	Virola laevigata Standl.	Virola	laevigata	Myristicaceae	Mesoamerica	Costa Rica	Puntarenas		Parque Nacional Corcovado Sirena, Ollas Trail	1 - 20 m	1	20	m	08°27'36"N 083°34'48"W	8.46	-83.58	1989-10-19	19	10	1989				Tree, 27 m × 30 cm DAP; buttresses thin, triangular; bark grey, scaly; fruits immature, aril still white; occasional to common; primary ridge forest.	CR-2 sheets, INPA*, MO	2018	D. Santamaría-Aguilar
C. Kernan & P. Phillips	962		Virola laevigata	Virola laevigata Standl.	Virola	laevigata	Myristicaceae	Mesoamerica	Costa Rica	Puntarenas		Parque Nacional Corcovado Sirena, Corcovado Basin Trail.	10 m	10		m	08°27'36"N 083°34'48"W	8.46	-83.58	1989-02-28	28	2	1989				Tree 40 m. Bark gay, flaking in vertical strips; trunk with little sap only slightly red; capsules yellow; arils right red. Frequent.	CR-2 sheets, MO	2018	D. Santamaría-Aguilar
J. Gómez-Laurito & V. Mora	13191		Virola laevigata	Virola laevigata Standl.	Virola	laevigata	Myristicaceae	Mesoamerica	Costa Rica	Puntarenas	Golfito	R.N.V.S Golfito. Orillas del camino a las torres de comunicación	450 - 500 m	450	500	m	08°39'10"N 083°09'50"W			1999-01-12	12	1	1999				Arbol 12 m x 50 cm DAP. Frutos con arilo rojizo.	CR	2018	D. Santamaría-Aguilar
G. Herrera & G. Rivera	7076		Virola laevigata	Virola laevigata Standl.	Virola	laevigata	Myristicaceae	Mesoamerica	Costa Rica	Puntarenas	Golfito	Playa Cacao. Fila entre quebrada Nazanero y el mar en Punta Voladora.	100 m	100		m	08°37'35"N 083°11'00"W			1994-05-26	26	5	1994				Arbol 20 m x 35 cm. Botón floral café, flor amarilla	CR	2018	D. Santamaría-Aguilar
J. Utley & K. Utley	1236		Virola laevigata	Virola laevigata Standl.	Virola	laevigata	Myristicaceae	Mesoamerica	Costa Rica	Puntarenas		Rincón de Osa, in vicinity of airstrip	40 m	40		m				1974-07-25	25	7	1974				Tree 11 m (35 feet), flowers yellow-brown.	CR	2018	D. Santamaría-Aguilar
R. Zúñiga	459		Virola laevigata	Virola laevigata Standl.	Virola	laevigata	Myristicaceae	Mesoamerica	Costa Rica	San José		Reserva Biológica Carara Sector Agrominas. Sitio Carretera Costanera.	100 m	100		m	09°46'48"N 084°36'00"W	9.78	-84.6	1991-09-20	20	9	1991				Árbol de 18 m × 20 cm DAP. Frutos de hasta 1.5 cm diámetro, aromáticos. Corteza finamente acanalada.	CR, MO	2018	D. Santamaría-Aguilar
R. Aguilar	6099		Virola laevigata	Virola laevigata Standl.	Virola	laevigata	Myristicaceae	Mesoamerica	Costa Rica	Puntarenas	Buenos Aires	Potrero Grande, Paso Real, Changuina, entre la Bonga y Zapotal	300 m	300		m	08°56'22"N 083°14'09"W			2000-03-08	8	2	2000				Arbol 7m x 10 cm DAP. Estéril.	CR	2018	D. Santamaría-Aguilar
J. González & L. J. Poveda	1290		Virola laevigata	Virola laevigata Standl.	Virola	laevigata	Myristicaceae	Mesoamerica	Costa Rica	Puntarenas	Puntarenas	Península de Nicoya. Montezuma, camino hacia las cataratas.	10 - 100	10	100	m	09°39'00"N 084°04'40"W			1996-11-08	8	11	1996				Arbol 15 m x 18 cm.	CR	2018	D. Santamaría-Aguilar
L. D. Vargas & G. Villalobos	1697		Virola laevigata	Virola laevigata Standl.	Virola	laevigata	Myristicaceae	Mesoamerica	Costa Rica	Puntarenas	Garabito	P. N. Carara. Camino a Coopecara, tercer quebrada después del río Tárcoles	40 m	40		m	09°48'12"N 084°34'58"W			2006-09-26	26	9	2006					CR	2018	D. Santamaría-Aguilar
A. Rodríguez et al.	7440		Virola laevigata	Virola laevigata Standl.	Virola	laevigata	Myristicaceae	Mesoamerica	Costa Rica	Puntarenas	Turrubares	San Juan de Mata. Montelimar; 1 km Este de la escuela	100 m	100	100	m	09°37'24"N 084°29'85"W			2001-10-15	15	10	2001					CR	2018	D. Santamaría-Aguilar
B. Hammel & I. Pérez	23944		Virola laevigata	Virola laevigata Standl.	Virola	laevigata	Myristicaceae	Mesoamerica	Costa Rica	Puntarenas	Puntarenas	Montezuma, camino a Cóbano por el río Montezuma, ca. 1.5 km oeste de la intersección con camino a Cabuya	101 m	101	101	m	09°38'59"N 085°04'26"W			2005-12-11	11	12	2005				Arbol 20 m. Frutos inmaduros verdes	CR	2018	D. Santamaría-Aguilar
L. D. Vargas & D. Castillo	1870		Virola laevigata	Virola laevigata Standl.	Virola	laevigata	Myristicaceae	Mesoamerica	Costa Rica	Puntarenas	Garabito	por Carara cerca de la toma de agua	97 m	97		m	09°45'19"N 084°36'02"W			2006-11-22	22	11	2006				Arbol 40 m x 60 cm DAP. Flores amarillentas escasas.	CR	2018	D. Santamaría-Aguilar
B. Hammel & I. Pérez	2006		Virola laevigata	Virola laevigata Standl.	Virola	laevigata	Myristicaceae	Mesoamerica	Costa Rica	Puntarenas	Puntarenas	Montezuma, por el camino al Canopy	100 m	100		m	09°38'59"N 085°04'26"W			2006-07-08	8	7	2006				Flores anaranjadas	CR	2018	D. Santamaría-Aguilar
M. Segura & F. J. Quesada	69		Virola laevigata	Virola laevigata Standl.	Virola	laevigata	Myristicaceae	Mesoamerica	Costa Rica	Puntarenas	Golfito	R. F. Golfo Dulce. Osa. Fila Esquinas. Bosque Esquinas.	200 m	200		m	08°42'00"N 083°34'00"W			1993-05-26	23	5	1993				Árbol de 15 m creciendo en parche de bosque. Botones florales pardo-claro.	CR, LSU, MO	2018	D. Santamaría-Aguilar
L. Acosta, V. H. Ramírez, G. Soto & G. Sancho	1251		Virola laevigata	Virola laevigata Standl.	Virola	laevigata	Myristicaceae	Mesoamerica	Costa Rica	Puntarenas	Golfito	R.F. Golfo Dulce. Península de Osa. Sector Los Patos, colecta en bosque a orilla del río Rincón.	70 m	70		m	08°34'55"N 083°29'55"W	8.58194	-83.4986	2000-05-17	17	5	2000				Árbol de 28 m X 60 cm DAP; escaso a orilla de quebrada en bosque. Estéril.	MO	2018	D. Santamaría-Aguilar
M. M. Gutiérrez de S.	21		Virola laevigata	Virola laevigata Standl.	Virola	laevigata	Myristicaceae	Mesoamerica	Panama	Chiriquí		Río Platanal-Bugaba.	160 m	160		m	08°29'N 082°37'W	8.48333	-82.6167	1975-11-10	10	11	1975				Árbol de 5 metros con fruto chocolate.	MO	2018	D. Santamaría-Aguilar
G. P. Cooper & G. M. Slater	308	Type of Virola laevigata	Virola laevigata	Virola laevigata Standl.	Virola	laevigata	Myristicaceae	Mesoamerica	Panama	Chiriquí		Progreso					08°27'N 082°50'W						1927				Bogamani	F*, NY*, WIS*, US*	2018	D. Santamaría-Aguilar
M. M. Gutiérrez de S.	21		Virola laevigata	Virola laevigata Standl.	Virola	laevigata	Myristicaceae	Mesoamerica	Panama	Chiriquí		Río Platanal-Bugaba.	160 m	160		m	08°29'N 082°37'W			1975-11-10	10	11	1975				Árbol de 5 metros con fruto chocolate.	MO	2018	D. Santamaría-Aguilar
G. C. de Nevers & H. Herrera	7916		Virola megacarpa	Virola megacarpa A.H. Gentry	Virola	megacarpa	Myristicaceae	Mesoamerica	Panama	San Blas		El Llano-Cartí road, Km 19.1.					09°20'N 078°58'W	9.33333	-78.9667	1986-06-18	18	6	1986				Tree; DBH 21.5 cm; cuadrat # 916.	MO	2018	D. Santamaría-Aguilar
G. C. de Nevers & H. Herrera	7917		Virola megacarpa	Virola megacarpa A.H. Gentry	Virola	megacarpa	Myristicaceae	Mesoamerica	Panama	San Blas		El Llano-Cartí road, Km 19.1.					09°20'N 078°58'W	9.33333	-78.9667	1986-06-18	18	6	1986				Tree; DBH 53 cm; cuadrat # 919.	MO	2018	D. Santamaría-Aguilar
G. C. de Nevers	5184		Virola megacarpa	Virola megacarpa A.H. Gentry	Virola	megacarpa	Myristicaceae	Mesoamerica	Panama	San Blas		El Llano-Cartí Road, Km 19.1.	350 m	350		m	09°19'N 078°55'W	9.31667	-78.9167	1985-03-19	19	3	1985				Tree 30 m; inner sap red; fruits brown.	MO	2018	D. Santamaría-Aguilar
G. C. de Nevers, H. Herrera & S. Charnley	6124		Virola megacarpa	Virola megacarpa A.H. Gentry	Virola	megacarpa	Myristicaceae	Mesoamerica	Panama	San Blas		El Llano-Cartí Road, Km 19.1. [Coordinates on original label: 9º19'N, 78º55'W].	350 m	350		m	09°20'N 078°58'W	9.33333	-78.9667	1985-11-02	2	11	1985				Branch fall from canopy tree; fruits brown.	MO	2018	D. Santamaría-Aguilar
G. McPherson & M. Richardson	15873		Virola megacarpa	Virola megacarpa A.H. Gentry	Virola	megacarpa	Myristicaceae	Mesoamerica	Panama	Colón		East of Portobelo; 3.3 miles E of intersection of Cuango/Nombre de Dios road with Isla Grande road, and then 2.7 miles S on road to manganese mine proposed site.	50 - 100 m	50	100	m	09°33'N 079°33'W	9.55	-79.55	1992-10-12	12	10	1992				Tree 25 m; fruit brown.	MO	2018	D. Santamaría-Aguilar
A. H. Gentry & J. D. Dwyer	4804	Type of Virola megacarpa	Virola megacarpa	Virola megacarpa A.H. Gentry	Virola	megacarpa	Myristicaceae	Mesoamerica	Panama	Colón		Santa Rita Ridge.					09°25'N 079°40'W	9.41667	-79.6667	1972-03-23	23	3	1972				Tree 15 m; fruits brown; pubescent.	BM*, MEXU*, MO, WIS*	2018	D. Santamaría-Aguilar
M. H. Nee	7920		Virola megacarpa	Virola megacarpa A.H. Gentry	Virola	megacarpa	Myristicaceae	Mesoamerica	Panama	Panamá	Chepo	Premontane wet forest area. El Llano-Cartí road, 5 km N of Pan-Am. Hwy. at El Llano	300 m	300		m	09°15'02"N 078°56'03"W	9.25055	-78.9342	10 Nov 1973 - 11 Nov 1973	10	11	1973	11	11	1973	MADw 32484. Tree 12 m tall, wood soft. Carples fuzzy brown, one seeded	MO	2018	D. Santamaría-Aguilar
J. A. Duke	15261		Virola megacarpa	Virola megacarpa A.H. Gentry	Virola	megacarpa	Myristicaceae	Mesoamerica	Panama	Colón		East ridge					09°24'30"N 079°38'30"W	9.40833	-79.6417	1968-02-23	23	2	1968				Large tree, the latex ultimately oxidizing reddish-brown. Would key to Virola in Fl. of Panama, but obviously fits none of these. Fruits 1-2, rufous-tomentose, to 6 cm.	MO	2018	D. Santamaría-Aguilar
G. McPherson	20081		Virola megacarpa	Virola megacarpa A.H. Gentry	Virola	megacarpa	Myristicaceae	Mesoamerica	Panama	Colón		Teck Cominco Petaquilla mining concession. Collected with M. Merello.	220 m	220		m	08°49'39"N 080°40'28"W	8.8275	-80.6744	2008-02-20	20	2	2008				Tree 25 m; leaves & fruit gathered beneath tree.	MO	2018	D. Santamaría-Aguilar
G. McPherson	20505		Virola megacarpa	Virola megacarpa A.H. Gentry	Virola	megacarpa	Myristicaceae	Mesoamerica	Panama	Colón	Donoso	Teck Cominco Petaquilla mining concession. Forested slopes along ridge road.	110 m	110		m	08°49'28"N 080°39'29"W	8.82444	-80.6581	2008-03-10	10	3	2008				Tree 20 m; fruit & leaves on ground; fruit yellow-brown; aril red.	MO	2018	D. Santamaría-Aguilar
G. McPherson	21104		Virola megacarpa	Virola megacarpa A.H. Gentry	Virola	megacarpa	Myristicaceae	Mesoamerica	Panama	Colón	Donoso	Site of proposed copper mine (MPSA). Forested slopes. Collected with M. Merello.	75 m	75		m	08°55'43"N 080°40'48"W	8.92861	-80.68	2009-12-04	4	12	2009				Treefall; sterile.	MO	2018	D. Santamaría-Aguilar
M. H. Nee & E. L. Tyson	10983		Virola megacarpa	Virola megacarpa A.H. Gentry	Virola	megacarpa	Myristicaceae	Mesoamerica	Panama	Panamá	Chepo	Premontane wet forest along El Llano-Cartí road, 16-18.5 km by road N of PanAmerican Hwy. at El Llano.	400 - 450 m	400	450	m	09°17'50"N 078°56'03"W	9.29722	-78.9342	1974-03-28	28	3	1974				Large tree. Fruit brown, splitting, aril red.	MO	2018	D. Santamaría-Aguilar
W. S. Alverson & C. W. Hamilton	1922		Virola megacarpa	Virola megacarpa A.H. Gentry	Virola	megacarpa	Myristicaceae	Mesoamerica	Panama	Panamá		El Llano-Cartí Road, approx. 7.9 km N (by land) of junction with Interamerican Highway.	350 - 400 m	350	400	m	09°15'N 079°00'W	9.25	-79	1982-10-14	14	10	1982				Sterile tree sapling, 3 m. Large soft leaves with golden brown indumentum on veins.	MO	2018	D. Santamaría-Aguilar
T. B. Croat	27785		Virola megacarpa	Virola megacarpa A.H. Gentry	Virola	megacarpa	Myristicaceae	Mesoamerica	Panama	Veraguas	Santa Fe	Valley of Río Dos Bocas along road between Escuela Agricola Alto Piedra and Calovebora, 15.6 km northwest of Santa Fé; along trail to Santa Fé, steep forested hill east of river	450 - 550 m	450	550	m	08°33'03"N 081°10'17"W	8.55083	-81.1714	1974-08-31	31	8	1974				Tree 20 m; flowrs pale yellow.	MO	2018	D. Santamaría-Aguilar
C. Ramos	332A		Virola megacarpa	Virola megacarpa A.H. Gentry	Virola	megacarpa	Myristicaceae	Mesoamerica	Panama	Colón		Minera Panamá. Botija, Sector 4.	176 m	176		m	08°50'45"N 080°39'39"W	8.84583	-80.6608	2014-09-27	27	9	2014				Arbol talado. Colectado por Eduardo Santamaría.	MO	2018	D. Santamaría-Aguilar
G. Rivera	1659		Virola montana	Virola montana D. Santam.	Virola	montana	Myristicaceae	Mesoamerica	Costa Rica	Cartago	Turrialba	Santa Teresita. Monumento Nacional Guayabo. Sobre los ríos Guayabo, Lajas y Torito.	700 -1800 m	700	1800	m	09°57'50"N 083°41'30"W			1992-05-08	8	5	1992				Arbol 12 m x 20 cm DAP. Floración ferruginea.	CR, MO, USJ	2018	D. Santamaría-Aguilar
G. Rivera	2933		Virola montana	Virola montana D. Santam.	Virola	montana	Myristicaceae	Mesoamerica	Costa Rica	Guanacaste	Tilarán	Lago Coter. Hotel Eco-Lodge. Sendero Montana.	700 m	700		m	10°35'00"N 084°56'00"W			1997-04-09	9	4	1997				Arbol 25 m de alto. Flores ferrugineas.	CR	2018	D. Santamaría-Aguilar
B. Boyle, L. Esquivel & S. Kelly	2938		Virola montana	Virola montana D. Santam.	Virola	montana	Myristicaceae	Mesoamerica	Costa Rica	Heredia	Sarapiqui	Parque Nacional Braulio Carrillo, Cordillera Central, Puesto El Ceibo, on ridge crest 250 m east of Transect Trail, primary premontane wet forest	750 m	750		m	10°17'24"N 084°04'12"W	10.29	-84.07	1994-03-05	5	3	1994				Tree, 20.2 cm dbh. Blood red sap from trunk slash. Sterile. Transect 750-1.	MO	2018	D. Santamaría-Aguilar
W. A. Haber & E. Cruz	7698		Virola montana	Virola montana D. Santam.	Virola	montana	Myristicaceae	Mesoamerica	Costa Rica	Alajuela		Reserva Biológica Monteverde. Río Peñas Blancas, Finca Wilson Salazar.	800 m	800		m	10°18'N 084°43'W	10.3	-84.7167	1987-11-07	7	11	1987				Árbol de 25 m, en orilla del bosque. Flores amarillas.	CR, INPA*, MO, USJ	2018	D. Santamaría-Aguilar
E. Bello	470		Virola montana	Virola montana D. Santam.	Virola	montana	Myristicaceae	Mesoamerica	Costa Rica	Alajuela		Reserva Biológica Monteverde Río Peñas Blancas. Parcela de Badilla	800 m	800		m	10°18'36"N 084°42'36"W	10.31	-84.71	1988-10-23	23	10	1988				Árbol de 25 m × 30 cm DAP, en orilla de montaña. Fruto dorado. Fruto, ramas y corteza con látex naranja. Semilla cubierta por un arilo rojo.	CR-2 sheets, INPA*, LSU, MO	2018	D. Santamaría-Aguilar
J. León	2368		Virola montana	Virola montana D. Santam.	Virola	montana	Myristicaceae	Mesoamerica	Costa Rica	Heredia		Cariblanco	800 m	800		m	10°16'48"N 084°10'43"W			1950-03-01		3	1950					USJ	2018	D. Santamaría-Aguilar
E. Bello	855		Virola montana	Virola montana D. Santam.	Virola	montana	Myristicaceae	Mesoamerica	Costa Rica	Alajuela		Reserva Biológica Monteverde. Río Peñas Blancas. Parcela de Jesús Rojas.	850 - 900 m	850	900	m	10°19'N 084°44'W	10.3167	-84.7333	1989-05-05	5	5	1989				Árbol de 25 m × 20 cm DAP, en orilla de bosque. Pedúnculos café. Flores crema.	CR-2 sheets, INPA*, MEXU*, MO	2018	D. Santamaría-Aguilar
J. Gómez-Laurito, G. Vargas & V. Mora	11846		Virola montana	Virola montana D. Santam.	Virola	montana	Myristicaceae	Mesoamerica	Costa Rica	Alajuela		Reserva Forestal de San Ramón. Estación Río San Lorencito.	850 - 900 m	850	900	m	10°13'15"N 084°36'00"W	10.2208	-84.6	1989-10-18	18	10	1989				Árbol de 15 m × 60 cm DAP, secresión resinosa oxidándose rápido; algunos frutos abierto mostrando las semillas con un arilo rojo.	CR, MEXU*, MO, USJ	2018	D. Santamaría-Aguilar
W. A. Haber & E. Bello	6978		Virola montana	Virola montana D. Santam.	Virola	montana	Myristicaceae	Mesoamerica	Costa Rica	Alajuela		Reserva Biológica Monteverde. Río Peñas Blancas.	850 m	850		m	10°20'N 084°43'W	10.3333	-84.7167	1987-03-31	31	3	1987				Árbol de 6 m × 10 cm DAP, en orilla de quebrada. Flor amarilla, cáliz café.	CR, F*, INPA*, MEXU*, MO	2018	D. Santamaría-Aguilar
W. C. Burger et al.	12152		Virola montana	Virola montana D. Santam.	Virola	montana	Myristicaceae	Mesoamerica	Costa Rica	Alajuela		Reserva Forestal de San Ramón. Premontane rain forest formations on slopes above and in the valley of the rio San Lorencito.	850 -1150 m	859	1150	m	10°13'N 083°37'W			12-14 marzo 1987	2018-12-14	3	1987				Arbol 8 m.	CR, F*	2018	D. Santamaría-Aguilar
E. Bello	5404		Virola montana	Virola montana D. Santam.	Virola	montana	Myristicaceae	Mesoamerica	Costa Rica	Alajuela	San Ramon	Reserva Biológica Monteverde, Cordillera de Tilarán, Valle del Río Peñas Blancas, Ref. Alema.	900 m	900		m	10°18'36"N 084°45'00"W	10.31	-84.75	1993-11-10	10	11	1993				Árbol de 7 m × 10 cm DAP, en orilla del bosque. Flores marrón-naranja.	CR, LSU, MO	2018	D. Santamaría-Aguilar
E. Lépiz & J. F. Morales	284	Type of Virola montana	Virola montana	Virola montana D. Santam.	Virola	montana	Myristicaceae	Mesoamerica	Costa Rica	Cartago	Jiménez	Valle del Reventazón, Taus de Pejibaye, cercas de potreros a orilla de camino	900 m	900		m	09°46'48"N 083°44'24"W	9.78	-83.74	1994-04-06	6	4	1994				Árbol de 15 m × 50 cm de DAP con ramificación a 3 m. Tallos jóvenes, pecíolos e inflorescencia con pubescencia café extendiéndose por el nervio central y la base de los nervios secundarios en el envés. Común.	CR-2 sheets, LSU, MO, USJ	2018	D. Santamaría-Aguilar
K. Caballero	2		Virola montana	Virola montana D. Santam.	Virola	montana	Myristicaceae	Mesoamerica	Costa Rica	Alajuela	San Ramon	No protegida, Cuenca del San Carlos, Reserva Biológica Alberto Brenes, Estación San Lorencito, Curso Plantas, Diptera-Himenoptera.	900 m	900		m	10°13'26"N 084°35'20"W	10.2239	-84.5889	2000-05-03	3	5	2000				Arbol de 8 m x 10 cm DAP. Inflorescencia amarillo-café.	CR-2 sheets, MO	2018	D. Santamaría-Aguilar
R. W. Lent	3899		Virola montana	Virola montana D. Santam.	Virola	montana	Myristicaceae	Mesoamerica	Costa Rica	Alajuela	San Ramon	Remnant trees in pasture, 2 km northeast of La Balsa de San Ramón	900 m	900		m	10°10'48"N 084°28'48"W	10.18	-84.48	1976-09-26	26	9	1976				Tree of 18 m.	CR-3 sheets, INPA*, MARY*, MEXU*, MO, PMA*, U*	2018	D. Santamaría-Aguilar
J. Gómez-Laurito	11484		Virola montana	Virola montana D. Santam.	Virola	montana	Myristicaceae	Mesoamerica	Costa Rica	Alajuela		Reserva Forestal de San Ramón.	900 - 1200	900	1200	m	10°13'N 083°37'W			16-19 abril 1987	16-19	4	1987				Arbol 12 m x 60 cm DAP	CR, F-2 sheets*	2018	D. Santamaría-Aguilar
J. Gómez-Laurito	11446		Virola montana	Virola montana D. Santam.	Virola	montana	Myristicaceae	Mesoamerica	costa Rica	alajuela		Reserva Forestal de San Ramón.	900 - 1200	900	1200	m	10°13'N 083°37'W			12-15 marzo 1987			1987				Arbol 10 m. Flores pardas	CR, USJ	2018	D. Santamaría-Aguilar
E. Bello	553		Virola montana	Virola montana D. Santam.	Virola	montana	Myristicaceae	Mesoamerica	Costa Rica	Guanacaste		San Gerardo, Zona Monteverde.	1000 m	1000		m	10°22'N 084°48'W	10.3667	-84.8	1988-11-21	21	11	1988				Árbol, 6 m, potrero de rebrotes. Fruto naranja. Fruta dorada.	CR, INPA*, MO	2018	D. Santamaría-Aguilar
F. A. Quesada	20		Virola montana	Virola montana D. Santam.	Virola	montana	Myristicaceae	Mesoamerica	Costa Rica	Alajuela	San Ramon	Reserva Forestal San Ramón, Cordillera de Tilarán, Estación Río San Lorenzo, sendero al Volcán Muerto.	1100 m	1100		m	10°12'36"N 084°36'00"W	10.21	-84.6	1993-04-26	26	4	1993				Árbol de 17 m × 4 cm DAP. Sépalos pardo, ovario amarillento.	CR, LSU, MO	2018	D. Santamaría-Aguilar
G. Rivera	1910		Virola montana	Virola montana D. Santam.	Virola	montana	Myristicaceae	Mesoamerica	Costa Rica	Cartago	Turrialba	Colecta en el límite Sur del Monumento Nacional Guayabo, sector Las Ventanas.	1100 m	1100		m	09°57'50"N 083°41'30"W	9.96389	-83.6917	1992-07-07	7	7	1992				Árbol. 35 m de altura, 45 DAP. Frutos ferrugíneos abundantes.	CR, F*, MO, USJ	2018	D. Santamaría-Aguilar
J. F. Morales & E. Lépiz	2654		Virola montana	Virola montana D. Santam.	Virola	montana	Myristicaceae	Mesoamerica	Costa Rica	Cartago	Jiménez	Cord. de Talamanca; Río Pejibaye; Taus; Bosque primario y potreros en las faldas del cerro Alto El Humo.	1200 - 900 m	1200	900	m	09°47'25"N 083°44'21"W	9.79028	-83.7392	1994-04-06	6	4	1994				Árbol de 11 m × 37 cm DAP. Botones marrón.	CR, MO	2018	D. Santamaría-Aguilar
R. Aguilar & H. H. Schmidt	1131		Virola montana	Virola montana D. Santam.	Virola	montana	Myristicaceae	Mesoamerica	Costa Rica	Limón	Talamanca	Bratsi. Alto Lari. Kivut.	1300 - 1500 m	1300	1500	m	09°23'50"N 083°05'20"W	9.39722	-83.0889	1992-03-15	15	3	1992				Árbol de 20 m × 50 cm DAP. Frutos recolectados del suelo. Follaje nuevo y pocos frutos.	CR, MO	2018	D. Santamaría-Aguilar
J. F. Utley & K. Burt-Utley	5054		Virola montana	Virola montana D. Santam.	Virola	montana	Myristicaceae	Mesoamerica	Costa Rica	Cartago	Paraiso	5 km northeast of Río Grande de Orosi at Tapantí	1300 m	1300		m	09°45'36"N 083°48'00"W	9.76	-83.8	1976-05-27	27	5	1976				Tree to 45 feet; flowers greenish-white trimerous.	CR-2 sheets, MEXU-2 sheets*, MO-2 sheets	2018	D. Santamaría-Aguilar
G. Davidse	24178		Virola montana	Virola montana D. Santam.	Virola	montana	Myristicaceae	Mesoamerica	Costa Rica	Puntarenas		Fila El Tigre, SE of Las Alturas.	1350 - 1450 m	1350	1450	m	08°56'N 082°51'W	8.93333	-82.85	1983-08-29	29	8	1983				Tree 20 m tall; fruit green.	CR, INPA*, MEXU*, MO	2018	D. Santamaría-Aguilar
E. Alfaro	2357		Virola montana	Virola montana D. Santam.	Virola	montana	Myristicaceae	Mesoamerica	Costa Rica	Puntarenas	Coto Brus	Z.P. Las Tablas. Cuenca Terraba-Sierpe. Sitios Las Juntas.	1500 m	1500		m	08°56'34"N 082°48'36"W	8.94277	-82.81	1999-07-03	3	7	1999				Arbol de 25 m x 40 cm, frutos verdes.	CR-2 sheets, MO	2018	D. Santamaría-Aguilar
R. Kriebel, D. Solano & E. Alfaro	4174		Virola montana	Virola montana D. Santam.	Virola	montana	Myristicaceae	Mesoamerica	Costa Rica	Puntarenas	Coto Brus	No protegida. Cuenca Térraba-Sierpe. Hacienda La Amistad. La Neblina. Acompñan Eduardo y Frank Alfaro.	1600 - 2000 m	1600	2000	m	08°53'50"N 082°45'20"W	8.89722	-82.7556	28 diciembre 2003	28	12	2003				Árbol 15 m. Ramitas con indumento ferrugíneo. Flores de tres partes.	CR-2 sheets, MO	2018	D. Santamaría-Aguilar
M. Chinchilla & IV Curso de Parataxónomos	3		Virola montana	Virola montana D. Santam.	Virola	montana	Myristicaceae	Mesoamerica	Costa Rica	Puntarenas	Coto Brus	P. I. La Amistad. Cordillera de Talamanca. Estación Pittier. Sendero Altamira.	1650 m	1650		m	09°02'20"N 082°57'25"W	9.03889	-82.9569	1995-01-28	28	1	1995				Árbol de 6 m. Creciendo en potrero. Flores café claro.	CR-2 sheets, LSU, MO	2018	D. Santamaría-Aguilar
J. González	823		Virola montana	Virola montana D. Santam.	Virola	montana	Myristicaceae	Mesoamerica	Costa Rica	Puntarenas	Coto Brus	Parque Internacional La Amistad. Santa María de Pittier, camino de acceso al puesto de vigilancia Pittier.	1700 m	1700		m	09°01'38"N 082°51'56"W			1995-06-13	13	6	1996				Arbol 12 m x 20 cm DAP. Frutos inmaduros pardos.	CR-2 sheets	2018	D. Santamaría-Aguilar
Á. Fernández	354		Virola montana	Virola montana D. Santam.	Virola	montana	Myristicaceae	Mesoamerica	Costa Rica	Puntarenas	Coto Brus	Z.P. Las Tablas; Cordillera de Talamanca. Orillas del límite entre la Estación y la Zona Protectora.	2000 m	2000		m	08°57'36"N 082°54'36"W	8.96	-82.91	1992-09-01	1	9	1992				Arbol de 30 m x 30 cm DAP. Frutos amarillento dorado. Crece a un lado del sendero Paralelo.	CR	2018	D. Santamaría-Aguilar
G. Herrera, I. Chacón & Á. Solís	514		Virola montana	Virola montana D. Santam.	Virola	montana	Myristicaceae	Mesoamerica	Costa Rica	Alajuela		Río San Lorenzito, en ladera noroeste de la estación					10°12'53"N 084°36'28"W	10.2147	-84.6078	1987-03-30	30	3	1987				Árbol de 10-12 m, inflorescencia ferrugínea con flores amarillas, hojas de envés ligeramente blanquecino-plateado.	CR, INPA*, LSU, MO	2018	D. Santamaría-Aguilar
I. Chacón, G. Herrera & H. Gómez	1819		Virola montana	Virola montana D. Santam.	Virola	montana	Myristicaceae	Mesoamerica	Costa Rica	Puntarenas	Coto Brus	Zona Protectora Las Tablas, Río Cotoncito, bosque muy húmedo-montano bajo					08°56'24"N 082°44'24"W	8.94	-82.74	1983-12-10	10	12	1983				Árbol de 15 m de alto, 25 cm DAP, frutos pardo amarillo, semillas café, con arilo rojizo.	INPA*, LSU-2 sheets, MO	2018	D. Santamaría-Aguilar
G. Herrera	5544		Virola montana	Virola montana D. Santam.	Virola	montana	Myristicaceae	Mesoamerica	Costa Rica	Alajuela	San Carlos	La Fortuna. Finca El Jilguero. Cima del Cerro Chato. Alrededro de la laguna.	1160 m			m	10°26'35"N 084°41'25"W			1992-11-20	20	11	1992				Arbol 30 m x 60 cm DAP. Fruto amarillo de color amarillo.	CR	2018	D. Santamaría-Aguilar
LRH [L. R. Holdridge]	2618		Virola montana	Virola montana D. Santam.	Virola	montana	Myristicaceae	Mesoamerica	Costa Rica	Heredia		Cariblanco	800 m	800		m				10-Aug-1950	10	8	1950				Tree 10 m tall.	USJ
G. McPherson	7756		Virola montana	Virola montana D. Santam.	Virola	montana	Myristicaceae	Mesoamerica	Panama	Bocas del Toro		Bocas del Toro-Chiriquí border above Fortuna dam. [Coordinates on orginal label: c. 8º45'N, 82º15'W].	1200 m	1200		m	08°45'58"N 082°12'45"W	8.76611	-82.2125	1985-12-04	4	12	1985				Fallen from 18 m tree; leaves light green beneath; fruit brown.	MO	2018	D. Santamaría-Aguilar
G. McPherson	7756		Virola montana	Virola montana D. Santam.	Virola	montana	Myristicaceae	Mesoamerica	Panama	Bocas del Toro		Bocas del Toro-Chiriquí border above Fortuna dam. [Coordinates on orginal label: c. 8º45'N, 82º15'W].	1200 m	1200		m	08°45'58"N 082°12'45"W	8.76611	-82.2125	1985-12-04	4	12	1985				Fallen from 18 m tree; leaves light green beneath; fruit brown.	INPA*, MO, PMA*	2018	D. Santamaría-Aguilar
W. A. Schipp	279	Type of Virola multiflora	Virola multiflora	Virola multiflora (Standl.) A.C. Sm.	Virola	multiflora	Myristicaceae	Mesoamerica	Belize	Stann Creek		Stann Creek Railway.	100 ft	100		f	16°56'00"N 088°14'09"W	16.9333	-88.2358	1929-07-16	16	7	1929				Small tree, 30 ft., 5 ins. diameter. Growing in open forest in swampy places. When in full bloom flowers yellow. "Rare". elev. 100 ft.	MO	2018	D. Santamaría-Aguilar
P. H. Gentle	4342		Virola multiflora	Virola multiflora (Standl.) A.C. Sm.	Virola	multiflora	Myristicaceae	Mesoamerica	Belize	Toledo		Between Rancho Chico and Cockscomb, Monkey River					16°43'N 088°37'W	16.7167	-88.6167	1943-03-26	26	3	1943				Tree, 10 inches diameter, flowers yellow. "bastard banak"	MO	2018	D. Santamaría-Aguilar
A. H. Gentry	8615		Virola multiflora	Virola multiflora (Standl.) A.C. Sm.	Virola	multiflora	Myristicaceae	Mesoamerica	Belize	Cayo		Mile 28, Hummingbird Highway south of Belmopan.	200 - 300 ft	200	300	f	17°04'N 088°36'W	17.0667	-88.6	1973-06-26	26	6	1973				Tree 15 meters; flowers yellowish.	MO	2018	D. Santamaría-Aguilar
P. Hechenleitner	289		Virola multiflora	Virola multiflora (Standl.) A.C. Sm.	Virola	multiflora	Myristicaceae	Mesoamerica	Belize	Stann Creek		Cockscomb Basin Wildlife Sanctuary. On the way to Waterfall Ben's Bluff.	80 m	80		m	16°46'30"N 088°27'09"W	16.775	-88.4525	2007-01-17	17	1	2007				Tree up to 17 m high, dbh=17 cm, bark exuding red sap. Tree of small crown, growing as shade tolerant with other tree species of Elaeocarpaceae, Chrysobalinaceae, Annonaceae, Leguminosae. Fruits present, large nerved red aril covering the seeds.	MO	2018	D. Santamaría-Aguilar
P. H. Gentle	3333		Virola multiflora	Virola multiflora (Standl.) A.C. Sm.	Virola	multiflora	Myristicaceae	Mesoamerica	Belize	Stann Creek		Stann Creek Valley, Big Eddy Ridge	50 - 200 m	50	200	m	16°58'20"N 088°26'29"W	16.9722	-88.4414	1940-05-12	12	5	1940				Tree, 10 inch diamete; flowers yellow. "Bastard banak."	MO	2018	D. Santamaría-Aguilar
W. A. Schipp	858		Virola multiflora	Virola multiflora (Standl.) A.C. Sm.	Virola	multiflora	Myristicaceae	Mesoamerica	Belize	Toledo		Big Creek.	100 ft	100		f				1931-12-02	2	12	1931				Magnificent tree, flowers light yellow, wood much like cedar in colour and grain. 40 feet, 9 inch diameter.	MO	2018	D. Santamaría-Aguilar
W. D. Stevens, G. Herrera & O.M. Montiel	24874		Virola multiflora	Virola multiflora (Standl.) A.C. Sm.	Virola	multiflora	Myristicaceae	Mesoamerica	Costa Rica	Limón		Cerro Coronel, E of Laguna Danto.	60 - 100 m	60	100	m	10°41'N 083°38'W	10.6833	-83.6333	1987-03-15	15	3	1987				Tree 6 m tall, tree plot voucher.	MO	2018	D. Santamaría-Aguilar
M. H. Grayum & B. Jacobs	5341		Virola multiflora	Virola multiflora (Standl.) A.C. Sm.	Virola	multiflora	Myristicaceae	Mesoamerica	Costa Rica	Heredia		Finca El Bejuco, S base of Cerros Sardinal, Chilamate de Sarapiquí. 10º27'N, 84º04'W. Elev. 70-100 m.	70 - 100 m	70	100	m	10°27'00"N 084°03'36"W	10.45	-84.06	1985-06-02	2	6	1985				Subcanopy tree ca. 12 m tall on slope in forest. Leaves moderately whitened below; flowers cream-yellow.	CR, MO	2018	D. Santamaría-Aguilar
G. Herrera	2167		Virola multiflora	Virola multiflora (Standl.) A.C. Sm.	Virola	multiflora	Myristicaceae	Mesoamerica	Costa Rica	Limón	Matina	Cordillera de Talamanca. Matina. Intersección de Río Barbilla y Quebrada Cañabral, por la fila al norte.	100 - 200 m	100	200	m	10°01'N 083°24'W	10.0167	-83.4	1988-10-11	11	10	1988				Árbol de 8-10 m × 30 cm DAP. Abundante. Follaje de envés grisáceo. Frutos verdes inmaduros.	MO	2018	D. Santamaría-Aguilar
R. Robles, G. Herrera, L. Flores & M. Rojas	2063		Virola multiflora	Virola multiflora (Standl.) A.C. Sm.	Virola	multiflora	Myristicaceae	Mesoamerica	Costa Rica	Limón		Parque Nacional Tortuguero. Lomas de Sierpe, 4 Km al NE del puesto de P.N. sobre el Río Sierpe. Lomas con pendientes medianamente pronunciadas, abundante hojarasca. Suelo bien drenado.	100 m	100		m	10°24'N 083°33'W	10.4	-83.55	1988-08-15	15	8	1988				Árbol de 25-30 m. Sin gambas, fuste derecho con las ramas verticiladas. Corteza lisa con exudado rojizo acuoso y abundante. Hojas de envés más claro que el haz.	MO	2018	D. Santamaría-Aguilar
R. L. Liesner, E. J. Judziewicz & B. Pérez	15390		Virola multiflora	Virola multiflora (Standl.) A.C. Sm.	Virola	multiflora	Myristicaceae	Mesoamerica	Costa Rica	Cartago	Turrialba	24 km northeast of Turrialba on highway to Limón, then east at Tres Equis on jeep road 1.5 km.	450 - 525 m	450	525	m	09°57'36"N 083°33'36"W	9.96	-83.56	1983-05-10	10	5	1983				3 m tree. Flowers yellow.	MO	2018	D. Santamaría-Aguilar
G. S. Hartshorn	2553		Virola multiflora	Virola multiflora (Standl.) A.C. Sm.	Virola	multiflora	Myristicaceae	Mesoamerica	Costa Rica	Heredia		Tropical wet forest along Guácimo ridge trail; La Selva Protection Zone.	315 m	315		m	10°25'12"N 084°01'12"W	10.42	-84.02	1983-01-18	18	1	1983				Tree, 20 cm dbh, 15 m tall; fruit yellow; aril red; inner bark with red sap.	CR, MO-2 sheets	2018	D. Santamaría-Aguilar
L. D. Gómez	24151		Virola multiflora	Virola multiflora (Standl.) A.C. Sm.	Virola	multiflora	Myristicaceae	Mesoamerica	Costa Rica	Limón	Talamanca	Bajo Telire, Río Telire	400 - 600 m	400	600	m	09°36'00"N 083°11'24"W	9.6	-83.19	1984-07-01		7	1984				Tree 15 m. Flws yellow.	CR, MO	2018	D. Santamaría-Aguilar
E. Rojas	160		Virola multiflora	Virola multiflora (Standl.) A.C. Sm.	Virola	multiflora	Myristicaceae	Mesoamerica	Costa Rica	Limón	Pococí	R.N.F.S. Barra del Colorado. Llanura de Tortuguero. Sector Cororí.	100 m	100		m	10°35'40"N 083°48'00"W	10.5944	-83.8	1990-11-21	21	11	1990				Árbol de 5 m. Frutos verdes.	CR, MO	2018	D. Santamaría-Aguilar
Ó. Valverde	39		Virola multiflora	Virola multiflora (Standl.) A.C. Sm.	Virola	multiflora	Myristicaceae	Mesoamerica	Costa Rica	Limón	Talamanca	Fila Carbón. Buena Vista. Finca Corredor Biológico.	550 m	550		m	09°39'34"N 082°53'54"W	9.65944	-82.8983	1997-04-10	10	4	1997				Arbol. 15m x20 cm. DAP. Corteza y hojas aromáicas. Hojas glaucas por el envés. Frutos amarillos al madurar, semillas cubiertas por arilo rojo. Creciendo a orilla de quebrada.	CR, MO	2018	D. Santamaría-Aguilar
J. F. Morales	10322		Virola multiflora	Virola multiflora (Standl.) A.C. Sm.	Virola	multiflora	Myristicaceae	Mesoamerica	Costa Rica	Alajuela	San Carlos	R.V.S. Corredor Fronterizo C.R.-Nicaragua. Cuenca del San Carlos. 2 km antes de Boca San Carlos.	0 - 100 m	0	100	m	10°46'40"N 084°11'20"W	10.7778	-84.1889	15 marzo 2004	15	3	2004				Árbol de 6 m. Flores amarillas.	CR, MO	2018	D. Santamaría-Aguilar
G. S. Hartshorn	2263		Virola multiflora	Virola multiflora (Standl.) A.C. Sm.	Virola	multiflora	Myristicaceae	Mesoamerica	Costa Rica	Limón	Guacimo	Along north border of Hacienda Neguev, near Guácimo.	200 m	200		m	10°12'46"N 083°41'16"W	10.2128	-83.6878	1980-07-09	9	7	1980				Tree, 35 cm dbh, 25 m tall; flowers golden.	CR, MO	2018	D. Santamaría-Aguilar
B. E. Hammel & I. Pérez	27148		Virola multiflora	Virola multiflora (Standl.) A.C. Sm.	Virola	multiflora	Myristicaceae	Mesoamerica	Costa Rica	Heredia	Sarapiqui	Puerto Viejo de Sarapiquí, camino a Cerros Sardinal, Caño Negro.	71 m	71		m	10°33'08"N 084°03'06"W	10.5522	-84.0517	2016-07-25	25	7	2016				Árbol 6 m; flores anaranjadas.	CR	2018	D. Santamaría-Aguilar
A. Estrada et al.	4793		Virola multiflora	Virola multiflora (Standl.) A.C. Sm.	Virola	multiflora	Myristicaceae	Mesoamerica	Costa Rica	Limón		Las Brisas de Veragua. Propiedad de Veragua Rainforest. Trayecto entre el Restaurante y el Serpentario.	387 m	387		m	09°55'28,7"N 83°11'28,9"W			2011-03-01	1	3	2011				Árbol de 10 m, creciendo a orilla de camino. Flores amarillas.	CR	2018	D. Santamaría-Aguilar
O. Valverde	1237		Virola multiflora	Virola multiflora (Standl.) A.C. Sm.	Virola	multiflora	Myristicaceae	Mesoamerica	Costa Rica	Limón		R.I. Cabécar. Sixaola, San Miguel, camino entre Fila Tsipubeta y Cerro Mirador.	250 m				09°40'50"N 82°59'30"W			1999-11-12							Arbol de 7 m x 15 cm DAP. Hojas glaucas por el envés, olorosas. Flores amarillas a nivel de botones. Creciendo bajo dosel de bosque.	CR	2018	D. Santamaría-Aguilar
J. Sanchez et al.	2460		Virola multiflora	Virola multiflora (Standl.) A.C. Sm.	Virola	multiflora	Myristicaceae	Mesoamerica	Costa Rica	Limón		Estribación SE de Fila Muchilla. El Progreso. Finca Pandora, propiedad del señor Oscar Ramírez	309 m				09°46'14,8"N 83°03'38,5"W			2011-11-23							Árbol 5 m. Frutos verdes.	CR	2018	D. Santamaría-Aguilar
L. Acosta et al.	2100		Virola multiflora	Virola multiflora (Standl.) A.C. Sm.	Virola	multiflora	Myristicaceae	Mesoamerica	Costa Rica	Limón		R.B. Hitoy Cerere. Cuenca del Estrella. Fila Espavel.	200 m	200		m	09°39'37"N 83°01'11W			2000-07-03							Escaso. Arbol de 35 cmx 15 m, en bosque. Botones florales amarillentos.	CR-2 sheets, MO	2018	D. Santamaría-Aguilar
J. Gómez-Laurito et al.	12340		Virola multiflora	Virola multiflora (Standl.) A.C. Sm.	Virola	multiflora	Myristicaceae	Mesoamerica	Costa Rica	Limón		Talamanca. Finca La Culebra. A 1.5 km de camino Bribrí, desvío por el camino rural. Río SandBox.	0 - 200				09°38'05"N 82°50'W			1992-10-26							Arbol 8 m de alto. Flores blancas.	USJ	2018	D. Santamaría-Aguilar
M. Blanco & A. Vega	1460		Virola multiflora	Virola multiflora (Standl.) A.C. Sm.	Virola	multiflora	Myristicaceae	Mesoamerica	Costa Rica	Limón		Siquirres. Fila Mirador, camino a Las Brisas de Pacuarito.	400 m				09°59'N, 083°26'W			2000-02-13							Arbolito 6 m x 15 cm DAP. Ramas descendentes. Flores amarillas. Frutos amarillos. Semilla café con arilo rojo.	USJ	2018	D. Santamaría-Aguilar
P. R. House	2308		Virola multiflora	Virola multiflora (Standl.) A.C. Sm.	Virola	multiflora	Myristicaceae	Mesoamerica	Honduras	Gracias a Dios		Transecto Botánico Cerro Krautara, 30 min al norte de Krautara, Río Patuca. Bosque primario	120 m	120		m	15°03'N 084°52'W	15.05	-84.8667	1995-03-16	16	3	1995				Árbol de 30 m. "Asang Banak" para leña, hacer postes cabos de hembra, masos para palas.	MO	2018	D. Santamaría-Aguilar
P. R. House	1888		Virola multiflora	Virola multiflora (Standl.) A.C. Sm.	Virola	multiflora	Myristicaceae	Mesoamerica	Honduras	Gracias a Dios	Puerto Lempira	El Centro. 1 km al sureste de Krausirpe, pie de montaña de Wimpi.	90 m	90		m	15°03'N 084°50'W	15.05	-84.8333	1994-02-18	18	2	1994				Arbusto. "Banak Almuk." Las aves comen las frutas.	MO	2018	D. Santamaría-Aguilar
W. D. Stevens, O.M. Montiel & W. Robleto	23484		Virola multiflora	Virola multiflora (Standl.) A.C. Sm.	Virola	multiflora	Myristicaceae	Mesoamerica	Nicaragua	Río San Juan		Between Río Santa Cruz and Caño Santa Crucita, La Palma; tall evergreen forest	40 - 60 m	40	60	m	11°02'N 084°24'W	11.0333	-84.4	30 Nov 1984 - 2 Dec 1984	30	11	1984	2	12	1984	understory, tree 15 m tall, leaves whitened below, fruits blue-green	MO	2018	D. Santamaría-Aguilar
J. J. Pipoly	3615		Virola multiflora	Virola multiflora (Standl.) A.C. Sm.	Virola	multiflora	Myristicaceae	Mesoamerica	Nicaragua	Atlántico Norte		El Salto, along Río Pis Pis, and surrounding hills; open fields and disturbed rainforest	100 m	100		m	14°04'N 084°38'W	14.0667	-84.6333	1979-02-27	27	2	1979					MO	2018	D. Santamaría-Aguilar
J. J. Pipoly	3837		Virola multiflora	Virola multiflora (Standl.) A.C. Sm.	Virola	multiflora	Myristicaceae	Mesoamerica	Nicaragua	Atlántico Norte		13 km above Kururia on road to San Jerónimo.	150 - 200 m	150	200	m	14°40'N 084°07'W	14.6667	-84.1167	1979-03-02	2	3	1979					MO	2018	D. Santamaría-Aguilar
J. J. Pipoly	3846		Virola multiflora	Virola multiflora (Standl.) A.C. Sm.	Virola	multiflora	Myristicaceae	Mesoamerica	Nicaragua	Atlántico Norte		13 km above Kururia on road to San Jerónimo.	150 - 200 m	150	200	m	14°40'N 084°07'W	14.6667	-84.1167	1979-03-02	2	3	1979					MO	2018	D. Santamaría-Aguilar
P. P. Moreno	22994		Virola multiflora	Virola multiflora (Standl.) A.C. Sm.	Virola	multiflora	Myristicaceae	Mesoamerica	Nicaragua	Río San Juan		Santa Eduviges	70 m	70		m	11°03'N 084°28'W	11.05	-84.4667	1984-02-17	17	2	1984				Arbusto, 2 a 3 m de alto, frutos verdes.	MO	2018	D. Santamaría-Aguilar
P. P. Moreno	23253		Virola multiflora	Virola multiflora (Standl.) A.C. Sm.	Virola	multiflora	Myristicaceae	Mesoamerica	Nicaragua	Río San Juan		1 km al NW del Río Santa Cruz	60 m	60		m	11°02'N 084°25'W	11.0333	-84.4167	1984-02-22	22	2	1984				Arbusto, 3 a 4 m de alto, frutos amarillos.	MO	2018	D. Santamaría-Aguilar
J.C. Sandino	3302		Virola multiflora	Virola multiflora (Standl.) A.C. Sm.	Virola	multiflora	Myristicaceae	Mesoamerica	Nicaragua	Atlántico Sur		2 km de Colonia Serrano, Comarca El Escobillo; bosque húmedo	80 - 100 m	80	100	m	11°35'N 084°21'W	11.5833	-84.35	1982-07-28	28	7	1982				Arbol 10 m de alto, flores amarillas.	MO	2018	D. Santamaría-Aguilar
P. P. Moreno & W. Robleto	25984		Virola multiflora	Virola multiflora (Standl.) A.C. Sm.	Virola	multiflora	Myristicaceae	Mesoamerica	Nicaragua	Río San Juan		Sobre el Río Sábalo	40 m	40		m	11°03'N 084°28'W	11.05	-84.4667	7 julio 1984 - 8 julio 1984	7	7	1984	8	7	1984	Arbol, 10 m de alto, flores amarillas.	MO	2018	D. Santamaría-Aguilar
N. Zamora & M. Castrillo	1945		Virola multiflora	Virola multiflora (Standl.) A.C. Sm.	Virola	multiflora	Myristicaceae	Mesoamerica	Nicaragua	Atlántico Sur		Sitio La Bodega, Río Kukra, sur de Bluefields	10 - 20 m	10	20	m	11°54'N 083°55'W	11.9	-83.9167	1993-02-15	15	2	1993				Arbol de 5 m. Frecuente. Nombre vernacular: Cebo.	CR	2018	D. Santamaría-Aguilar
N. Zamora & M. Castrillo	1975		Virola multiflora	Virola multiflora (Standl.) A.C. Sm.	Virola	multiflora	Myristicaceae	Mesoamerica	Nicaragua	Atlántico Sur		Sitio La Bodega, Río Kukra, sur de Bluefields	10 - 20 m	10	20	m	11°54'N 083°55'W	11.9	-83.9167	1993-02-15	15	2	1993				Arbol de 7 m. Frutos amarillentos. Frecuente.	CR	2018	D. Santamaría-Aguilar
R.M. Rueda, B. Hernández & I. Coronado G.	3575		Virola multiflora	Virola multiflora (Standl.) A.C. Sm.	Virola	multiflora	Myristicaceae	Mesoamerica	Nicaragua	Atlántico Sur		Camino a lo largo del Río Punta Gorda, entre la Corriente la Guitarrona y San José.	50 - 100 m	50	100	m	11°31'N 084°10'W	11.5167	-84.1667	26 Febrero 1994	26	2	1994				Arbol, 15 m; frutos anaranjados.	MO	2018	D. Santamaría-Aguilar
R.M. Rueda, B. Hernández & I. Coronado G.	3607		Virola multiflora	Virola multiflora (Standl.) A.C. Sm.	Virola	multiflora	Myristicaceae	Mesoamerica	Nicaragua	Atlántico Sur		Camino a lo largo del Río Punta Gorda, entre la Corriente la Guitarrona y San José.	50 - 100 m	50	100	m	11°31'N 084°10'W	11.5167	-84.1667	26 Febrero 1994	26	2	1994				Arbol, 12 m; envés blanquecino; frutos amarillos.	MO	2018	D. Santamaría-Aguilar
R.M. Rueda, P. E. Sánchez V. & A. Grijalva P.	7493		Virola multiflora	Virola multiflora (Standl.) A.C. Sm.	Virola	multiflora	Myristicaceae	Mesoamerica	Nicaragua	Río San Juan		Municipio el Castillo, Estación Biológica La Lupe.	200 m	200		m	11°08'N 084°38'W	11.1333	-84.6333	27 octubre 1997	27	10	1997				Arbol 7 m, estéril. NC: conchillo.	MO	2018	D. Santamaría-Aguilar
R.M. Rueda, I. Coronado G. & W. Velásquez	8196		Virola multiflora	Virola multiflora (Standl.) A.C. Sm.	Virola	multiflora	Myristicaceae	Mesoamerica	Nicaragua	Río San Juan		Municipio del Castillo. Estación Biológica Bartola a 3 kilometro de le desembocodura.	50 - 100 m	50	100	m	10°58'00"N 084°19'50"W	10.9667	-84.3306	1998-07-26	26	7	1998				Arbol 25 m; estéril. NC: cebo.	MO	2018	D. Santamaría-Aguilar
R.M. Rueda, I. Coronado G. & Y. Rubi	8946		Virola multiflora	Virola multiflora (Standl.) A.C. Sm.	Virola	multiflora	Myristicaceae	Mesoamerica	Nicaragua	Río San Juan		Reserva Indio-Maiz, Municipio de San Juan del Norte, base del Cerro Gigante.	200 - 300 m	200	300	m	10°45'N 083°53'W	10.75	-83.8833	1998-09-23	23	9	1998				Arbol 15 m; estéril.	MO	2018	D. Santamaría-Aguilar
R.M. Rueda, F. Flores, W. Velásquez & O. Caballero	9177		Virola multiflora	Virola multiflora (Standl.) A.C. Sm.	Virola	multiflora	Myristicaceae	Mesoamerica	Nicaragua	Río San Juan		Municipio el Castillo, Reserva Indio-Maiz, Cerro Bolívar	150 - 280 m	150	280	m	10°51'N 084°10'W	10.85	-84.1667	1998-11-28	28	11	1998				Arbol 5 m; frutos verdes.	MO	2018	D. Santamaría-Aguilar
R.M. Rueda, I. Coronado G., O. Caballero & L. Ruíz	9857		Virola multiflora	Virola multiflora (Standl.) A.C. Sm.	Virola	multiflora	Myristicaceae	Mesoamerica	Nicaragua	Atlántico Sur		Municipio de Nueva Guinea Reserva Indio-Maiz, colinas de piedra fina.	200 - 300 m	200	300	m	11°25'N 084°13'W	11.4167	-84.2167	1999-01-05	5	1	1999				Arbol 12 m; frutos verdes.	MO	2018	D. Santamaría-Aguilar
R.M. Rueda, I. Coronado G., O. Caballero & L. Ruíz	9960		Virola multiflora	Virola multiflora (Standl.) A.C. Sm.	Virola	multiflora	Myristicaceae	Mesoamerica	Nicaragua	Atlántico Sur		Municipio de Nueva Guinea, Reserva Indio-Maiz, colinas de piedra fina.	200 - 300 m	200	300	m	11°25'N 084°13'W	11.4167	-84.2167	7 enero 1999	7	1	1999				Arbol 12 m; frutos verdes.	CR	2018	D. Santamaría-Aguilar
R.M. Rueda, I. Coronado G., F. Flores & W. Velásquez	10338		Virola multiflora	Virola multiflora (Standl.) A.C. Sm.	Virola	multiflora	Myristicaceae	Mesoamerica	Nicaragua	Río San Juan		Municipio de el Castillo, Reserva Indio-Maíz, zona de amortiguamiento, estación biológica La Lupe.	100 - 200 m	100	200	m	11°08'N 084°21'W	11.1333	-84.35	1999-03-15	15	3	1999				Arbol 15 m; frutos amarillentos, arilo rojo.	MO	2018	D. Santamaría-Aguilar
W. D. Stevens	18661		Virola multiflora	Virola multiflora (Standl.) A.C. Sm.	Virola	multiflora	Myristicaceae	Mesoamerica	Nicaragua	Atlántico Norte		Along road from Siuna to El Dos, ca. 1 km E of Cerro Livico; roadside and slope with second growth evergreen forest, with scattered limestone boulders exposed.	400 - 600 m	400	600	m	13°46'00"N 084°47'00"W	13.7667	-84.7833	1980-12-12	12	12	1980					MO	2018	D. Santamaría-Aguilar
R.M. Rueda & O. Caballero	14294		Virola multiflora	Virola multiflora (Standl.) A.C. Sm.	Virola	multiflora	Myristicaceae	Mesoamerica	Nicaragua	Matagalpa		Municipio de Río Blanco. Reserva Natural Cerro Musún.	500 - 1400 m	500	1400	m	12°58'N 085°13'W	12.9667	-85.2167	2000-07-15	15	7	2000				Arbol 15 m; flores amarillentas.	MO	2018	D. Santamaría-Aguilar
R.M. Rueda & W. Velásquez	15004		Virola multiflora	Virola multiflora (Standl.) A.C. Sm.	Virola	multiflora	Myristicaceae	Mesoamerica	Nicaragua	Río San Juan		Reserva Indio-Maíz, Municipio del Castillo, Estación experimental La Lupe.	100 m	100		m	11°07'N 084°22'W	11.1167	-84.3667	22 Noviembre 2000 - 25 Noviembre 2000	22	11	2000	25	11	2000	Arbol, 20 m; frutos verdes.	MO	2018	D. Santamaría-Aguilar
A. Laguna	123		Virola multiflora	Virola multiflora (Standl.) A.C. Sm.	Virola	multiflora	Myristicaceae	Mesoamerica	Nicaragua	Atlántico Sur		Boca de Piedra	50 m	50		m	11°52'N 084°15'W	11.8667	-84.25	1982-11-02	2	11	1982					MO	2018	D. Santamaría-Aguilar
I. Coronado G., M. Barrios, G. Pérez & F. Moncada	2306		Virola multiflora	Virola multiflora (Standl.) A.C. Sm.	Virola	multiflora	Myristicaceae	Mesoamerica	Nicaragua	Jinotega		Municipio del Cua Bocay, Reserva de Bosawas, comunidad de Walakitan; Transecto 7, ubicado en zona de conservación	278 m	278		m	14°28'N 085°03'W	14.4667	-85.05	2005-10-03	3	10	2005				T7 P2 1 x 1 m. Arbol 7 m; frutos verdes. N.C.: Samo. Uso: medicinal (látex para curar granos).	MO	2018	D. Santamaría-Aguilar
G. R. Proctor, G. C. Jones & L. Facey	26980		Virola multiflora	Virola multiflora (Standl.) A.C. Sm.	Virola	multiflora	Myristicaceae	Mesoamerica	Nicaragua	Atlántico Sur		Vicinity of Base Camp (ca. 3.6 km due SE of Cerro San Isidro) and 0.6-1.4 km N of Base Camp, Río Kama	30 m	30		m	12°17'N 084°01'W	12.2833	-84.0167	1966-03-05	5	3	1966				Tree 20 m.	CR	2018	D. Santamaría-Aguilar
P. P. Moreno	27266		Virola multiflora	Virola multiflora (Standl.) A.C. Sm.	Virola	multiflora	Myristicaceae	Mesoamerica	Nicaragua	Río San Juan		Boca Negra, Río San Juan	120 m	120		m	11°10'N 084°29'W	11.1667	-84.4833	1990-02-14	14	2	1990				Arbol 10 m de alto, frutos amarillos, semillas con arilos	MO	2018	D. Santamaría-Aguilar
J. Manzanares	3561		Virola multiflora	Virola multiflora (Standl.) A.C. Sm.	Virola	multiflora	Myristicaceae	Mesoamerica	Nicaragua	Río San Juan		Río San Juan, Municipio El Castillo, los alrededores del puesto de la comunidad Nueva Samaria	400 m	400		m	11°06'03"N 084°16'49"W	11.1008	-84.2803	2005-04-24	24	4	2005					MO	2018	D. Santamaría-Aguilar
C. Centeno	245		Virola multiflora	Virola multiflora (Standl.) A.C. Sm.	Virola	multiflora	Myristicaceae	Mesoamerica	Nicaragua	Jinotega		Municipio de Wiwilí, Comunidad La Esperanza, Reserva Bosawas, Territorio Miskito Indian Tasbaika Kum, parcela 2 en el tacotal 500 m al oeste de la finca de Leonidas Bodin	60 - 70 m	60	70	m	14°13'49"N 085°19'15"W	14.2303	-85.3208	21 febrero 2008 - 25 febrero 2008	21	2	2008	25	2	2008		MO	2018	D. Santamaría-Aguilar
L. Romero	93		Virola multiflora	Virola multiflora (Standl.) A.C. Sm.	Virola	multiflora	Myristicaceae	Mesoamerica	Nicaragua	Río San Juan		Municipio El Castillo, comunidad Las Maravillas, 300 m al norte de la casa de Pablo Romero.	150 - 200 m	150	200	m	11°07'04"N 084°20'23"W	11.1178	-84.3397	22 mayo 2008 - 24 mayo 2008	22	5	2008	24	5	2008		MO	2018	D. Santamaría-Aguilar
R. M. Rueda, I. Coronado G., F. Flores, W. Velásquez & O. Caballero	9593		Virola multiflora	Virola multiflora (Standl.) A.C. Sm.	Virola	multiflora	Myristicaceae	Mesoamerica	Nicaragua	Río San Juan		Municipio el Castillo, Reserva Indio-Maiz; Cerro el Diablo.	250 - 350 m	250	300	m	11°01'N 084°12'W	11.0167	-84.2	08-Dec-1998	8	12	1998				Arbol 25 m; frutos verdes.	MO	2018	D. Santamaría-Aguilar
T. B. Croat	11462		Virola nobilis	Virola nobilis A.C. Sm.	Virola	nobilis	Myristicaceae	Mesoamerica	Panama	Canal Area		Barro Colorado Island: Snyder-Molino Trail	10 - 150 m	10	150	m	09°09'30"N 079°50'20"W	9.15833	-79.8389	1970-07-23	23	7	1970				At purification plant; tree, 2.5 m; fruits round, 3 cm diameter, light orange at maturity; splitting open in two parts while still on tree, aril bright red.	MO	2018	D. Santamaría-Aguilar
R. J. Schmalzel	320		Virola nobilis	Virola nobilis A.C. Sm.	Virola	nobilis	Myristicaceae	Mesoamerica	Panama	Canal Area		Barro Colorado Island	10 - 20 m	10	20	m	09°09'47"N 079°50'14"W	9.16306	-79.8372	1982-01-26	26	1	1982				Clipped from tree, male. Growing S of ESP Tower.	MO	2018	D. Santamaría-Aguilar
R. J. Schmalzel	88		Virola nobilis	Virola nobilis A.C. Sm.	Virola	nobilis	Myristicaceae	Mesoamerica	Panama	Canal Area		Barro Colorado Island. William Morton Wheeler Trail	10 - 170 m	10	170	m	09°09'20"N 079°51'10"W	9.15556	-79.8528	1981-11-16	16	11	1981				Large tree, moderately buttressed. Material collected from under tree, many fallen flowers, pollen appears orange-yellow. Wheeler Trail 2, on E side of trail, center of BCI.	MO	2018	D. Santamaría-Aguilar
R. B. Foster	1091		Virola nobilis	Virola nobilis A.C. Sm.	Virola	nobilis	Myristicaceae	Mesoamerica	Panama	Canal Area		Barro Colorado Island. Shore, south of Drayton House.				m				1969-07-06	6	7	1969				Tree 8 m, flowers yellow.	MO	2018	D. Santamaría-Aguilar
T. B. Croat	8417		Virola nobilis	Virola nobilis A.C. Sm.	Virola	nobilis	Myristicaceae	Mesoamerica	Panama	Canal Area		Barro Colorado Island. David Fairchild Trail.	10 - 100 m	10	100	m	09°09'50"N 079°50'15"W	9.16389	-79.8375	1969-03-05	5	3	1969				Tree, 28 m; flowers yellow. David Fairchild Trail 480; west of trail.	MO	2018	D. Santamaría-Aguilar
W. G. D'Arcy	9699		Virola nobilis	Virola nobilis A.C. Sm.	Virola	nobilis	Myristicaceae	Mesoamerica	Panama	Colón		Río Guanché					09°30'N 079°40'W - 09°30'N 079°41'W	9.5	-79.6667	1975-11-16	16	11	1975				Flowers yellowish, shrub 2 m tall.	MO	2018	D. Santamaría-Aguilar
O. E. Shattuck	694		Virola nobilis	Virola nobilis A.C. Sm.	Virola	nobilis	Myristicaceae	Mesoamerica	Panama	Canal Area		Barro Colorado Island.				m				1932-01-08	8	1	1932					MO	2018	D. Santamaría-Aguilar
T. B. Croat	16637A		Virola nobilis	Virola nobilis A.C. Sm.	Virola	nobilis	Myristicaceae	Mesoamerica	Panama	Canal Area		Barro Colorado Island, Snyder-Molino Trail.				m				1971-08-10	10	8	1971				Tree 22 m tall; fruits brown; aril red.	MO	2018	D. Santamaría-Aguilar
T. B. Croat	8090		Virola nobilis	Virola nobilis A.C. Sm.	Virola	nobilis	Myristicaceae	Mesoamerica	Panama	Canal Area		Barro Colorado Island. William Morton Wheeler Trail	10 - 170 m	10	170	m	09°09'20"N 079°51'10"W	9.15556	-79.8528	1969-02-22	22	2	1969				Tree 30 m, dbh 70 cm; fruits greenish-brown; aril white; bark brown, loose, flaking in small pieces; sap red, copious. Wheeler Trail, 720.	MO	2018	D. Santamaría-Aguilar
T. B. Croat	8270		Virola nobilis	Virola nobilis A.C. Sm.	Virola	nobilis	Myristicaceae	Mesoamerica	Panama	Canal Area		Barro Colorado Island. Shoreline of small cove south of Drayton House.	0 - 5 m	0	5	m	09°08'29"N 079°50'35"W	9.14139	-79.8431	1969-02-28	28	2	1969				Tree, 20 m; flowers yellow.	MO	2018	D. Santamaría-Aguilar	cf.
T. B. Croat	7488		Virola nobilis	Virola nobilis A.C. Sm.	Virola	nobilis	Myristicaceae	Mesoamerica	Panama	Canal Area		Barro Colorado Island. Fred Miller Trail	10 - 100 m	10	100	m	09°09'55"N 079°51'05"W	9.16528	-79.8514	1969-01-23	23	1	1969				Miller Trail 700; Tree 30 m; flowers yellow; bark with texture of coarse sandpaper; wood soft; branches only near apex coming off regularly at angles to stem.	MO	2018	D. Santamaría-Aguilar
S. Aviles	29		Virola nobilis	Virola nobilis A.C. Sm.	Virola	nobilis	Myristicaceae	Mesoamerica	Panama	Canal Area		Barro Colorado Island. Canal Zone.	10 - 100 m	10	100	m	09°09'N 079°51'W	9.15	-79.85	1931			1931				Tree, flowers yellow.	MO	2018	D. Santamaría-Aguilar
R.H. Wetmore, E. C. Abbe & O. E. Shattuck	155	Type of Virola nobilis	Virola nobilis	Virola nobilis A.C. Sm.	Virola	nobilis	Myristicaceae	Mesoamerica	Panama	Panamá		Barro Colorado Island. Canal Zone. Back of clearing at laboratory	20 m	20		m	09°09'49"N 079°50'30"W	9.16361	79.8417	07-Jan-1932	7	1	1932				Tree, 100' - 120' (88' to lowest branches).	MO-2 sheets	2018	D. Santamaría-Aguilar
R. Aguilar	3408		Virola nobilis aff.?	Virola aff?. nobilis A.C. Sm.	Virola	nobilis	Myristicaceae	Mesoamerica	Costa Rica	Puntarenas	Golfito	P.N. Corcovado. Península de Osa. Estación Sirena. Sendero Ollas.	10 m	10		m	08°28'50"N 083°35'30"W	8.48056	-83.5917	1994-06-13	13	6	1994				Árbol de 40 m × 70 cm DAP. Gambas de 3 m. pronunciadas. Fuste cilíndrico rojizo. Frutos amarillos-naranja.	CR, MO	2018	D. Santamaría-Aguilar	aff.?
K. Thomsen	180		Virola nobilis cf.	Virola cf. nobilis A.C. Sm.	Virola	nobilis	Myristicaceae	Mesoamerica	Costa Rica	Puntarenas		Aguabuena, 3.5 km W of Rincón. Four-hectare permanent sample plot 1 km N of BOSCOSA station in well-drained undulating terrain with slopes of 15-35º.	350 m	350		m	08°43'N 083°31'W	8.71667	-83.5167	1992-11-06	6	11	1992				Tall tree, DBH 57.7 cm. Straight, thin buttresses up to 2.5 m height. Flowers yellow. "fruta dorada". Plot #273.	MO	2018	D. Santamaría-Aguilar	cf.
A. Rodríguez	13016		Virola nobilis cf.	Virola cf. nobilis A.C. Sm.	Virola	nobilis	Myristicaceae	Mesoamerica	Costa Rica	Puntarenas	Osa	R.F. Golfo Dulce. Cuenca Térrabba-Sierpe. Los Mogos. A orilla de la carretera, junto a bosque. Acompaña Carlos Olivares.	100 - 200 m	100	200	m	08°45'24"N 083°22'11"W	8.75667	-83.3697	16 abril 2010	16	4	2010				Arbol 15 m. Frutos pardos.	CR, MO	2018	D. Santamaría-Aguilar	cf.
R. Aguilar	10800		Virola nobilis cf.	Virola cf. nobilis A.C. Sm.	Virola	nobilis	Myristicaceae	Mesoamerica	Costa Rica	Puntarenas	Osa	Rincón, cerca de Banegas Los Charcos, 1 km al Sur del centro, finca de Cundo.	59 m	59		m	08°40'18"N 083°30'17"W	8.67167	-83.5047	2008-01-13	13	1	2008				Arbol 25 m alto, 30 cm DAP. Flores ferrugineas.	MO, USJ	2018	D. Santamaría-Aguilar	cf.
R. Aguilar	11186		Virola nobilis cf.	Virola cf. nobilis A.C. Sm.	Virola	nobilis	Myristicaceae	Mesoamerica	Costa Rica	Puntarenas	Osa	Distrito: Sierpe; Reserva Forestal Golfo Dulce; Mogos, Punta Pargos a 29 km de Chacarita, bajos de Matías y Punta Pargos.	0 m	0		m	08°44'18"N 083°24'00"W	8.73833	-83.4	2008-04-17	17	4	2008				Arbol 20 m., 20 cm. Frutos verdes.	MO, USJ	2018	D. Santamaría-Aguilar
R. Aguilar & F. Cornejo	9739		Virola nobilis cf.	Virola cf. nobilis A.C. Sm.	Virola	nobilis	Myristicaceae	Mesoamerica	Costa Rica	Puntarenas	Golfito	Jiménez. Refugio Nacional de Vida Silvestre Osa. Puerto Jiménez, camino a Piro, finca de Adrian.	50 m	50		m	08°23'55"N 083°19'47"W	8.39861	-83.3297	2005-04-16	16	4	2005				Arbol 30.0 m x DAP 050 cm. Frutos maduros naranjas, semillas con arilo rojo.	MO	2018	D. Santamaría-Aguilar	cf.
B. E. Hammel & R. Robles	16722		Virola nobilis cf.	Virola cf. nobilis A.C. Sm.	Virola	nobilis	Myristicaceae	Mesoamerica	Costa Rica	Puntarenas		Reserva Forestal Golfo Dulce. Osa Península; Trocha de La Tarde rd. 10 km SW of La Palma, S of Rincón de Osa. Primary forest along red clay soil ridge E of the Río Rincón valley. Apr. 28-30.	150 - 200 m	150	200	m	08°37'N 083°28'W	8.61667	-83.4667	1988-04-28	28	4	1988				Tree 40 m, 65 cm dbh; leaves gray-green below; fruits orange.	CR, MO	2018	D. Santamaría-Aguilar	cf.
C. Kernan	808		Virola nobilis cf.	Virola cf. nobilis A.C. Sm.	Virola	nobilis	Myristicaceae	Mesoamerica	Costa Rica	Puntarenas		Parque Nacional Corcovado. Ollas Trail.	0 - 100 m	0	100	m	08°27'N 083°33'W - 08°30'N 083°38'W	8.45	-83.55	1988-08-13	13	8	1988				Tree, 40 m. Trunk moderately buttressed. Lower bark dark, reddish brown. Bark on the upper trunk gray, fissured vertically. Leaves distichous, narrowly obovate. Flowers yellowish green.	CR, MO	2018	D. Santamaría-Aguilar	cf.
R. Aguilar	1287		Virola nobilis cf.	Virola cf. nobilis A.C. Sm.	Virola	nobilis	Myristicaceae	Mesoamerica	Costa Rica	Puntarenas		Cantón de Osa Agua Buena Oeste.	0 m	0		m	08°42'00"N 083°30'36"W	8.7	-83.51	1992-09-08	8	9	1992				Árbol de 28 m × 40 cm DAP. Gambas pequeñas. Tronco cilíndrico, corteza lisa, savia rojiza. Frutos maduros amarillo pálido.	CR, USJ	2018	D. Santamaría-Aguilar	cf.
B. E. Hammel, R. Aguilar & J. C. Saborío	18170		Virola nobilis cf.	Virola cf. nobilis A.C. Sm.	Virola	nobilis	Myristicaceae	Mesoamerica	Costa Rica	Puntarenas	Osa	Reserva Forestal Golfo Dulce; Fila Ganado hasta Guerra.	1 - 300 m	1	300	m	08°44'00"N 083°36'00"W	8.73333	-83.6	1991-03-28	28	3	1991				Árbol 20 m; caido con tala de bosque por madereros; frutos café-claro. En bosque primario en la fila.	MO	2018	D. Santamaría-Aguilar	cf.
G. Herrera	4222		Virola nobilis cf.	Virola cf. nobilis A.C. Sm.	Virola	nobilis	Myristicaceae	Mesoamerica	Costa Rica	Puntarenas	Osa	Rancho Quemado, Sierpe. Siguiendo el camino nuevo a Drake. Cabeceras del Río Drake.	400 m	400		m	08°41'50"N 083°35'40"W	8.69722	-83.5944	1990-06-20	20	6	1990				Árbol de 20 m × 45 cm DAP. Secreción acuo-amarillenta. Frutos maduros: semilla café de arilo rojo-intenso.	CR, MO	2018	D. Santamaría-Aguilar	cf.
R. Aguilar	5094		Virola nobilis cf.	Virola cf. nobilis A.C. Sm.	Virola	nobilis	Myristicaceae	Mesoamerica	Costa Rica	Puntarenas	Osa	Fila Agua Buena, camino al faro Cerro Chocuaco.	200 m	200		m	08°42'00"N 083°30'00"W	8.7	-83.5	1997-09-05			1997				Arbol de 15 x 20 cm DAP. Frutos maduros amarillo-naranja, semillas con arilo rojo.	CR, MO	2018	D. Santamaría-Aguilar	cf.
W. Huber & A. Weissenhofer	494		Virola nobilis cf.	Virola cf. nobilis A.C. Sm.	Virola	nobilis	Myristicaceae	Mesoamerica	Costa Rica	Puntarenas	Golfito	Bosque de los Austriacos. Primary forest - RESEARCH PLOT - La Gamba.	300 m	300		m	08°41'N 083°13'W	8.68333	-83.2167	1994-04-23	23	4	1994				Life form: tree. Height: 35,00. Fruit: brown.	MO	2018	D. Santamaría-Aguilar	cf.
B. E. Hammel, M. M. Chavarría & N. Zamora	18017		Virola nobilis cf.	Virola cf. nobilis A.C. Sm.	Virola	nobilis	Myristicaceae	Mesoamerica	Costa Rica	Puntarenas	Osa	Reserva Forestal Golfo Dulce; Fila Ganado al noroeste de Rancho Quemado.	350 m	350		m	08°44'00"N 083°36'50"W	8.73333	-83.6139	1990-12-15	15	12	1990				Árbol 20 m × 50 cm DAP; flores amarillas verde-dorado, femininas.	CR-2 sheets, MO	2018	D. Santamaría-Aguilar	cf.
O. Valverde	135		Virola nobilis cf.	Virola cf. nobilis A.C. Sm.	Virola	nobilis	Myristicaceae	Mesoamerica	Costa Rica	San José	Tarrazú.	San Lorenzo. Llanos de Santa María. Cerro Nene, finca de Henry Marín.	900 -1300 m	900	1300	M	09°35'55"N 083°59'50"W			19-Aug-1997	19	8	1997				Arbol de 6m de alto. Hojas glaucas, glabras, savia acuosa rojiza. Fruto anaranjado, escaso. Creciendo al borde de camino	CR	2018	D. Santamaría-Aguilar	cf.
K. Thomsen	436		Virola nobilis cf.	Virola cf. nobilis A.C. Sm.	Virola	nobilis	Myristicaceae	Mesoamerica	Costa Rica	Osa		Aguabuena. 3.5 km W of Rincón. Specific locality unknown								1992-09-01	1	9	1992				Emergent tree.		2018	D. Santamaría-Aguilar	cf.
H. Herrera & O. Guillen	624		Virola nobilis cf.	Virola cf. nobilis A.C. Sm.	Virola	nobilis	Myristicaceae	Mesoamerica	Panama	San Blas		Tierra firme frente a Playón Chico, Isla Popa. [Coordinates on original label: 9º20'N, 780º13'W]	0 - 50 m	0	50	m	09°18'N 078°10'W	9.3	-78.1667	09 diciembre 1989	9	12	1989				Árbol 12 m, frutas verdes a anaranjadas. La corteza es empleada en baños de niños para tratar la fiebre, mareos y dolores de cabeza. Nombre kuna: "sabdurgia"	MO	2018	D. Santamaría-Aguilar	cf.
C. Galdames, E. Montenegro, C. Chung & Á. Espinosa	1415		Virola nobilis cf.	Virola cf. nobilis A.C. Sm.	Virola	nobilis	Myristicaceae	Mesoamerica	Panama	Colón		Aprox. km 1 al 10 de la carretera Gatún-Piñas. Bosque muy húmedo tropical	0 - 50 m	0	50	m	09°17'N 080°00'W	9.28333	-80	1994-07-26	26	7	1994				Arbol de 12 m, ramas verticiladas. Fruto amarillo pálido, semillas con arilo rojo	CR, MO	2018	D. Santamaría-Aguilar	cf.
G. C. de Nevers, H. Herrera & S. Charnley	6172		Virola nobilis cf.	Virola cf. nobilis A.C. Sm.	Virola	nobilis	Myristicaceae	Mesoamerica	Panama	San Blas		El Llano-Cartí Road, Km 19.1. Trail to Río Cartí Grande. [Coordinates on original label: 9º19'N, 78º55'W]	100 - 350 m	100	350	m	09°20'N 078°58'W - 09°22'N 078°58'W	9.33333	-78.9667	1985-11-03	3	11	1985				Tree 20 m; fruits brown.	MO	2018	D. Santamaría-Aguilar	cf.
H. Herrera & Ovidio Guillen	670		Virola nobilis cf.	Virola cf. nobilis A.C. Sm.	Virola	nobilis	Myristicaceae	Mesoamerica	Panama	San Blas		Camino de Suedi a Kariadi, tierra firme frente a Playón Chico, subiendo por Río Ailingandi.	0 - 50 m	0	50	m	09°17'00"N 078°13'30"W	9.28333	-78.225	10 diciembre 1989	10	12	1989				Arbol 25 m, frutas verdes a amarillas. La corteza se emplea en baños de niños contra la fiebre, el mareo y dolores de cabeza. Tambien se usa para controlar el vomito de sangre. Nombre kuna: "cuinur gia (cuinurgia)"	MO	2018	D. Santamaría-Aguilar	cf.
E.A. Lao & L. R. Holdridge	205		Virola nobilis cf.	Virola cf. nobilis A.C. Sm.	Virola	nobilis	Myristicaceae	Mesoamerica	Panama	Colón		Salud	50 m	50		m	09°12'30"N 080°07'00"W	9.20833	-80.1167	03 agosto 1971	3	8	1971				Miguelario dap 60 cm y 18 m de altura.	MO	2018	D. Santamaría-Aguilar	cf.
E. L. Tyson, J. D. Dwyer & Kurt E. Blum	3353		Virola nobilis cf.	Virola cf. nobilis A.C. Sm.	Virola	nobilis	Myristicaceae	Mesoamerica	Panama	Panamá	Panamá	East slope Cerro Jefé	2700 - 3000 ft	2700	3000	f	09°14'02"N 079°22'20"W	9.23389	-79.3722	1966-01-27	27	1	1966				Large tree. At 2700'.	MO	2018	D. Santamaría-Aguilar	cf.
E.A. Lao & L. R. Holdridge	205A		Virola nobilis cf.	Virola cf. nobilis A.C. Sm.	Virola	nobilis	Myristicaceae	Mesoamerica	Panama	Colón		Salud hills	50 - 100 m	50	100	m	09°12'N 080°07'W	9.2	-80.1167	1971-08-03	3	8	1971				Tree 18 m tall, 60 cm DBH. Called "Miguelario."	MO	2018	D. Santamaría-Aguilar	cf.
G. McPherson	8098		Virola nobilis cf.	Virola cf. nobilis A.C. Sm.	Virola	nobilis	Myristicaceae	Mesoamerica	Panama	Bocas del Toro		N of Fortuna Dam on road to Chiriquí Grande. [Coordinates on orginal label: 8º45'N, 82º15'W].	500 m	500		m	08°47'44"N 082°11'29"W	8.79556	-82.1914	1986-01-18	18	1	1986				Tree 5 m; leaves somewhat glaucous beneath; fruit brown-green.	MO	2018	D. Santamaría-Aguilar	cf.
R. L. Liesner	657		Virola nobilis cf.	Virola cf. nobilis A.C. Sm.	Virola	nobilis	Myristicaceae	Mesoamerica	Panama	Panamá	Chepo	Along newly cut road from El Llano to Carti-Tupile; 12 mi above Pan-Am Highway. Primary forest	200 - 500 m	200	500	m	09°18'40"N 078°56'40"W	9.31111	-78.9444	1973-03-13	13	3	1973				Tree; 15 meters; aril red.	MO	2018	D. Santamaría-Aguilar	cf.
G. C. de Nevers & H. Herrera	4333		Virola nobilis cf.	Virola cf. nobilis A.C. Sm.	Virola	nobilis	Myristicaceae	Mesoamerica	Panama	San Blas		El Llano-Cartí Road. Continental Divide Trail W from Km 12.2. [Coordinates on original label: 09º19'N, 78º55'W]	350 m	350		m	09°18'00"N 078°58'30"W	9.3	-78.975	1984-11-19	19	11	1984				Tree 25 m. Flowers yellow, fruits green.	MO	2018	D. Santamaría-Aguilar	cf.
A. H. Gentry	6748		Virola nobilis cf.	Virola cf. nobilis A.C. Sm.	Virola	nobilis	Myristicaceae	Mesoamerica	Panama	Panamá	Panamá	Cerro Jefe	800 - 1000 m	800	1000	m	09°14'02"N 079°22'30"W	9.23389	-79.375	1972-12-21	21	12	1972				Tree 20 m, fruit green. Altitude ca. 1000 m.	MO	2018	D. Santamaría-Aguilar	cf.
G. C. de Nevers, H. Herrera & S. Charnley	7430		Virola otobobifolia	Virola otobobifolia D. Santam.	Virola	otobobifolia	Myristicaceae	Mesoamerica	Panama	San Blas		Cangandí. Hills near village.	30 m	30		m	09°27'N 079°06'W	9.45	-79.1	1986-03-27	27	3	1986				Tree; DBH 24.9 cm; cuadrat #233; fruits brownish. Kuna name "cuinur burw".	MO-2 sheets, PMA*	2018	D. Santamaría-Aguilar
G. C. de Nevers & H. Herrera	7056		Virola otobobifolia	Virola otobobifolia D. Santam.	Virola	otobobifolia	Myristicaceae	Mesoamerica	Panama	San Blas		Cangandí.	30 m	30		m	09°26'N 079°07'W	9.43333	-79.1167	1986-02-10	10	2	1986				Tree; DBH 33.7 cm; quadrat #189; latex slow to appear, watery, red-black. Kuna name "cuinur burwi".	MO, INPA*, PMA*	2018	D. Santamaría-Aguilar
G. C. de Nevers, H. Herrera & S. Charnley	7448		Virola otobobifolia	Virola otobobifolia D. Santam.	Virola	otobobifolia	Myristicaceae	Mesoamerica	Panama	San Blas		Cangandí. Hills near village.	30 m	30		m	09°27'N 079°06'W	9.45	-79.1	1986-03-27	27	3	1986				Tree; DBH 37.3 cm; cuadrat #134.	MO	2018	D. Santamaría-Aguilar
G. C. de Nevers & H. Herrera	3981		Virola otobobifolia	Virola otobobifolia D. Santam.	Virola	otobobifolia	Myristicaceae	Mesoamerica	Panama	San Blas		El Llano-Cartí Road. [Coordinates on original label: 09º19'N, 78º55'W]	350 m	350		m	09°17'30"N 078°58'00"W	9.29167	-78.9667	1984-10-01	1	10	1984				Km 18. Tree 10 m tall, fruits brown.	MO, MEXU*, PMA*	2018	D. Santamaría-Aguilar
G. C. de Nevers, H. Herrera & S. Charnley	7530		Virola otobobifolia	Virola otobobifolia D. Santam.	Virola	otobobifolia	Myristicaceae	Mesoamerica	Panama	San Blas		Cangandí. Hills near village.	30 m	30		m	09°27'N 079°06'W	9.45	-79.1	1986-03-27	27	3	1986				Tree; DBH 33.4 cm; cuadrat #169; flowers yellow; trunk with black-red latex. Kuna name "putmas" or "cuinur burwi".	MEXU*, MO, PMA*	2018	D. Santamaría-Aguilar
G. C. de Nevers, H. Herrera & S. Charnley	7605		Virola otobobifolia	Virola otobobifolia D. Santam.	Virola	otobobifolia	Myristicaceae	Mesoamerica	Panama	San Blas		Cangandí. Hills near village.	30 m	30		m	09°27'N 079°06'W	9.45	-79.1	1986-03-27	27	3	1986				Tree; DBH 26.7 cm; cuadrat #273; inflorescence brown.	MEXU*, MO, PMA*	2018	D. Santamaría-Aguilar
G. C. de Nevers, H. Herrera & S. Charnley	7607		Virola otobobifolia	Virola otobobifolia D. Santam.	Virola	otobobifolia	Myristicaceae	Mesoamerica	Panama	San Blas		Cangandí. Hills near village.	30 m	30		m	09°27'N 079°06'W	9.45	-79.1	1986-03-27	27	3	1986				Tree; DBH 28 cm; cuadrat #270; inflorescence and fruit brown; clear latex.	MEXU*, MO, PMA*	2018	D. Santamaría-Aguilar
G. McPherson	7946		Virola otobobifolia	Virola otobobifolia D. Santam.	Virola	otobobifolia	Myristicaceae	Mesoamerica	Panama	Panamá		Below Cerro Jefe, along road to Río Pacora, c. 9º15'N, 79º30'W. Forested slopes. c. 850 m.	850 m	850		m	09°15'N 079°30'W	9.25	-79.5	09-Jan-1986	9	1	1986				Tree 10 m; fruit brown.	INPA*, MO, PMA*	2018	D. Santamaría-Aguilar
A. H. Gentry, S. A. Mori & J. A. Kallunki	14199		Virola otobobifolia	Virola otobobifolia D. Santam.	Virola	otobobifolia	Myristicaceae	Mesoamerica	Panama	Panamá	Chepo	El Llano-Carti road, 18 km from Pan American Highway, tropical wet forest	330 - 370 m	330	370	m	09°17'50"N 078°56'03"W	9.29722	-78.9342	1975-02-14	14	2	1975				Tree 30 m, buds brown; immature fruit brownish, aril laciniate, red at tip; sap watery, red, typically Myristicaceous.	MO, SCZ*	2018	D. Santamaría-Aguilar
J. P. Folsom	1440	Type of Virola otobifolia	Virola otobobifolia	Virola otobobifolia D. Santam.	Virola	otobobifolia	Myristicaceae	Mesoamerica	Panama	Panamá	Chepo	El Llano to Cartí Road 6.9 km N of Panamerican Highway	350 - 500 m	350	500	m	09°15'03"N 078°55'58"W	9.25083	-78.9328	1977-01-23	23	1	1977				Tree of 6 m, fruit like cinnamon dusted English walnuts.	MO-2 sheets, PMA*	2018	D. Santamaría-Aguilar
A. H. Gentry	14213		Virola otobobifolia	Virola otobobifolia D. Santam.	Virola	otobobifolia	Myristicaceae	Mesoamerica	Panama	Panamá	Chepo	El Llano-Carti road, 12.7 km N from Pan American Highway, tropical wet forest	350 m	350		m	09°16'45"N 078°55'51"W	9.27917	-78.9308	1975-02-15	15	2	1975				Tree 15 m, buds brown.	MO	2018	D. Santamaría-Aguilar
S. A. Mori & J. A. Kallunki	5542		Virola otobobifolia	Virola otobobifolia D. Santam.	Virola	otobobifolia	Myristicaceae	Mesoamerica	Panama	San Blas		El Llano-Carti road, 24.5-25 km from PanAmerican highway, near continental divide.					09°18'N 078°58'W	9.3	-78.9667	1975-04-12	12	4	1975				tree, 15 m tall, 20 cm dbh.	MO	2018	D. Santamaría-Aguilar
G. McPherson	20135		Virola otobobifolia	Virola otobobifolia D. Santam.	Virola	otobobifolia	Myristicaceae	Mesoamerica	Panama	Colón	Donoso	Teck Cominco Petaquilla mining concession. Forest along road. Collected with M. Merello.	200 m	200		m	08°49'39"N 080°40'28"W	8.8275	-80.6744	2008-02-21	21	2	2008				Tree 15 m; buds brown; open flowers yellow.	MO	2018	D. Santamaría-Aguilar
G. McPherson	20905		Virola otobobifolia	Virola otobobifolia D. Santam.	Virola	otobobifolia	Myristicaceae	Mesoamerica	Panama	Colón	Donoso	Westernmost part of province, site of proposed copper mine (INMET). Along route of proposed road. Lowland forest. Collected with Jean-Yves Serein.	150 m	150		m	08°53'04"N 080°42'27"W	8.88444	-80.7075	2009-04-12	12	4	2009				Tree 23 m; fruit brown.	MO	2018	D. Santamaría-Aguilar
T. B. Croat	33725		Virola otobobifolia	Virola otobobifolia D. Santam.	Virola	otobobifolia	Myristicaceae	Mesoamerica	Panama	Panamá	Chepo	El Llano/Cartí road, 4 miles from maingate near El Llano					09°15'01"N 078°55'45"W	9.25028	-78.9292	1976-03-27	27	3	1976				Tree 10 m; fruits brown.	MO	2018	D. Santamaría-Aguilar
N. Flores & R. Aizprúa	B3156		Virola otobobifolia	Virola otobobifolia D. Santam.	Virola	otobobifolia	Myristicaceae	Mesoamerica	Panama	Panamá		Parque Nacional Chagres. Cerro Jefe.				m				17-jan-2002	17	1	2002				Árbol de ± 15 m. Frutos chocolates. Látex rojo.	MO	2018	D. Santamaría-Aguilar
C. Moraga	227		Virola sebifera	Virola sebifera Aubl.	Virola	sebifera	Myristicaceae	Mesoamerica	Costa Rica	Guanacaste	La Cruz	Finca Pasmompa. 4 Km al S de Santa Cecilia.	400 m	400		m	11°02'00"N 085°24'30"W	11.0333	-85.4083	1990-12-10	10	12	1990				Árbol de 8 m x 13 cm DAP. Fuste recto, Peciolos, pedúnculos y botones pardos.	MO	2018	D. Santamaría-Aguilar
R. Aguilar	1586		Virola sebifera	Virola sebifera Aubl.	Virola	sebifera	Myristicaceae	Mesoamerica	Costa Rica	Puntarenas	Golfito	Península de Osa. 1 Km antes de llegar a La Palma, camino a Puerto Jiménez.	8 m	8		m	08°39'00"N 083°27'00"W	8.65	-83.45	1993-01-16	16	1	1993				Árbol de 10 m × 20 cm DAP. Fuste rollizo. Frutos maduros amarillo-naranja, semilla con arilo rojo.	MO	2018	D. Santamaría-Aguilar
W. D. Stevens	23823		Virola sebifera	Virola sebifera Aubl.	Virola	sebifera	Myristicaceae	Mesoamerica	Costa Rica	Limón		Cerro Coronel, E of Laguna Danto.	20 - 170 m	20	170	m	10°41'N 083°38'W	10.6833	-83.6333	16 January 1986 - 23 January 1986	16	1	1986	23	1	1986	Tree 30 m tall, flowers pale yellow.	MO	2018	D. Santamaría-Aguilar
R. Aguilar	272		Virola sebifera	Virola sebifera Aubl.	Virola	sebifera	Myristicaceae	Mesoamerica	Costa Rica	Puntarenas		Reserva Indígena Guaymí. ca. 2 km al Oeste de donde Río Pavón se junta con Río Rincón. Golfito.	250 m	250		m	08°37'00"N 083°31'30"W	8.61667	-83.525	1991-08-19	19	8	1991				Árbol de 11 m × 13 cm DAP. Eje de la infrutescencia y frutos ferrugíneo.	MO	2018	D. Santamaría-Aguilar
R. Aguilar	363		Virola sebifera	Virola sebifera Aubl.	Virola	sebifera	Myristicaceae	Mesoamerica	Costa Rica	Puntarenas	Golfito	Puerto Jiménez. Mata Palo.	160 - 200 m	160	200	m	08°23'00"N 083°18'00"W	8.38333	-83.3	1991-09-09	9	9	1991				Árbol de 10 m. Frutos con pubescencia ferrugínea.	MO	2018	D. Santamaría-Aguilar
E. Bello	1402		Virola sebifera	Virola sebifera Aubl.	Virola	sebifera	Myristicaceae	Mesoamerica	Costa Rica	Alajuela		Reserva Biológica Monteverde. Río Caño Negro, Finca de Rodolfo Quesada.	800 m	800		m	10°23'N 084°48'W	10.3833	-84.8	1989-10-19	19	10	1989				Árbol de 16 m × 40 cm DAP, en orilla de bosque. Fruto inmaduro ferrugíneo. Envés y ramas terminales ferrugíneas.	MO	2018	D. Santamaría-Aguilar
A. Chacón	908		Virola sebifera	Virola sebifera Aubl.	Virola	sebifera	Myristicaceae	Mesoamerica	Costa Rica	Puntarenas		Cantón de Osa Rincón de Osa, fila Casa Loma, Sendero Las Ranas.	450 m	450		m	08°42'36"N 083°31'48"W	8.71	-83.53	1990-07-17	17	7	1990				Árbol de 15 m × 15 cm DAP. Frutos inmaduros ferrugíneos.	MO	2018	D. Santamaría-Aguilar
T. B. Croat & M. H. Grayum	59693		Virola sebifera	Virola sebifera Aubl.	Virola	sebifera	Myristicaceae	Mesoamerica	Costa Rica	Puntarenas		Along road between Chacarita and Rincón de Osa, ca. 6 km W of Interamerican Highway at Chacarita.	160 m	160		m	08°45'N 083°18'W	8.75	-83.3	1985-03-02	2	3	1985				Tree 8 m; flowers brownish.	MO	2018	D. Santamaría-Aguilar
M. H. Grayum, G. Herrera & R. Robles	8710		Virola sebifera	Virola sebifera Aubl.	Virola	sebifera	Myristicaceae	Mesoamerica	Costa Rica	Limón		Cordillera de Talamanca. Ridge separating Río Madre de Dios from Quebrada Cañabral, and slope leading down to the latter.	380 - 440 m	380	440	m	10°02'N 083°26'W	10.0333	-83.4333	1988-09-03	3	9	1988				Tree ca. 20 m tall on ridge in pasture. Pubescence of lvs., fls. and frts. reddish-brown.	MO	2018	D. Santamaría-Aguilar
B. E. Hammel, G. Herrera, M. M. Chavarría & Á. Solís	16976		Virola sebifera	Virola sebifera Aubl.	Virola	sebifera	Myristicaceae	Mesoamerica	Costa Rica	Puntarenas		Reserva Forestal Golfo Dulce. Osa Península, Rancho Quemado, ca. 15 km W of Rincón; in bottom of S end of valley along Río Riyito.	200 m	200		m	08°40'N 083°34'W	8.66667	-83.5667	1988-06-02	2	6	1988				Tree in recently cleared area of forest.	MO	2018	D. Santamaría-Aguilar
B. E. Hammel	16635		Virola sebifera	Virola sebifera Aubl.	Virola	sebifera	Myristicaceae	Mesoamerica	Costa Rica	Puntarenas		Parque Nacional Corcovado. Estación Los Patos; on ridge in forest and along small stream.	120 m	120		m	08°34'N 083°31'W	8.56667	-83.5167	1988-04-01	1	4	1988				Tree 20 m; flowers very fragrant. Common on ridge in forest.	MO	2018	D. Santamaría-Aguilar
Q. Jiménez, J. F. Morales, E. Lépiz, E. Ureña & V. H. Ramírez	1314		Virola sebifera	Virola sebifera Aubl.	Virola	sebifera	Myristicaceae	Mesoamerica	Costa Rica	Alajuela	San Carlos	Llanura de San Carlos, Boca Tapada, carretera al Río San Juan, Finca Hogar de Ancianos	20 m	20		m	10°42'00"N 084°09'36"W	10.7	-84.16	1993-06-23	23	6	1993				Árbol de 11 m × 25 cm DAP, creciendo en borde de bosque. Frutos abundantes, verdes, con pubescencia ferrugínea.	CR, MO	2018	D. Santamaría-Aguilar
J. F. Morales	2022		Virola sebifera	Virola sebifera Aubl.	Virola	sebifera	Myristicaceae	Mesoamerica	Costa Rica	San José	Puriscal	Z. P. La Cangreja; Cuenca del Río Negro; San Martín de Puriscal; bosque primario al este de La Fila Vara Blanca.	800 m	800		m	09°44'12"N 084°23'28"W	9.73667	-84.3911	1993-11-20	20	11	1993				Árbol de 19 m × 41 cm DAP. Frutos verdes con pubescencia marrón abundante.	CR, MO	2018	D. Santamaría-Aguilar
Á. Fernández	204		Virola sebifera	Virola sebifera Aubl.	Virola	sebifera	Myristicaceae	Mesoamerica	Costa Rica	Puntarenas	Golfito	R.N.V.S. Golfito; Valle de Coto Colorado. Camino a las Torres del I.C.E., aprox. 2 km antes de llegar.	300 - 400 m	300	400	m	08°39'00"N 083°09'00"W	8.65	-83.15	1992-01-29	29	1	1992				Arbol de 6 m. Inflorescencia ferrugínea. Creciendo a orillas del camino.	CR, MO	2018	D. Santamaría-Aguilar
R. Aguilar	2171		Virola sebifera	Virola sebifera Aubl.	Virola	sebifera	Myristicaceae	Mesoamerica	Costa Rica	Puntarenas	Golfito	P.N. Corcovado. Península de Osa. Estación Los Patos, alrededores.	200 m	200		m	08°34'00"N 083°31'00"W	8.56667	-83.5167	1993-09-02	2	9	1993				Árbol de 15 m × 15 cm DAP. Fuste cilíndrico, savia incolora. Frutos verdes completamente cubiertos por una pubescencia ferrugínea muy abundante, la cual se desprende fácilmente.	CR, MO	2018	D. Santamaría-Aguilar
R. Aguilar	2335		Virola sebifera	Virola sebifera Aubl.	Virola	sebifera	Myristicaceae	Mesoamerica	Costa Rica	Puntarenas	Osa	P.N. Corcovado. Península de Osa. Estación San Pedrillo, sendero que va al límite.	100 m	100		m	08°37'00"N 083°44'00"W	8.61667	-83.7333	1993-09-19	19	9	1993				Árbol de 25 m × 35 cm DAP. Gambas 20 cm. Fuste cilíndrico, corteza oscura, savia rojiza, muy escasa. Frutos maduros verdes, aún con pubescencia ferrrugínea, semillas con arilo rojo.	CR, MO	2018	D. Santamaría-Aguilar
R. Aguilar	2553		Virola sebifera	Virola sebifera Aubl.	Virola	sebifera	Myristicaceae	Mesoamerica	Costa Rica	Puntarenas	Golfito	P.N. Corcovado. Península de Osa. Estación Sirena, alrededores; entre Sendero Río Claro y Ollas.	10 m	10		m	08°28'00"N 083°35'00"W	8.46667	-83.5833	1993-10-15	15	10	1993				Árbol de 15 m × 25 cm DAP. Gambas de 30 cm, fuste más o menos cilíndrico, corteza con savia rojiza. Frutos verdes con pubescencia ferrugínea, semillas con arilo rojo.	CR, MO	2018	D. Santamaría-Aguilar
B. E. Hammel, R. Aguilar & J. C. Saborío	18169		Virola sebifera	Virola sebifera Aubl.	Virola	sebifera	Myristicaceae	Mesoamerica	Costa Rica	Puntarenas	Osa	Reserva Forestal Golfo Dulce. Fila Ganado hasta Guerra.	1 - 300 m	1	300	m	08°44'00"N 083°36'00"W	8.73333	-83.6	1991-03-28	28	3	1991				Árbol 8 m; caido con tala de bosque por madereros; flores café-claro. En bosque primario en la fila.	CR, MO	2018	D. Santamaría-Aguilar
S. Rojas & R. Zúñiga	181		Virola sebifera	Virola sebifera Aubl.	Virola	sebifera	Myristicaceae	Mesoamerica	Costa Rica	Puntarenas	Buenos Aires	Reserva Indígena Boruca. Fila Moras. Camino a Boruca.	800 m	800		m	08°59'30"N 083°20'40"W	8.99167	-83.3444	1993-03-07	7	3	1993				Árbol de 16 m × 15 cm DAP, creciendo en Bosque secundario. Botones florales rojizos.	CR, MO	2018	D. Santamaría-Aguilar
J. F. Morales	4472		Virola sebifera	Virola sebifera Aubl.	Virola	sebifera	Myristicaceae	Mesoamerica	Costa Rica	San José	Acosta	Fila Bustamante. Fila San Jerónimo, bosque primario en el camino al bajo del río cabeceras Quebrada San Jerónimo.	900 - 1000 m	900	1000	m	09°42'57"N 084°17'02"W	9.71583	-84.2839	1995-06-24	24	6	1995				Árbol de 9 m. Botones florales marrón.	CR, MO	2018	D. Santamaría-Aguilar
N. C. Garwood, M. Gibby, R. J. Hampshire & C. J. Humphries	1027		Virola sebifera	Virola sebifera Aubl.	Virola	sebifera	Myristicaceae	Mesoamerica	Costa Rica	Heredia		North of Puerto Viejo, 10 km down road, by turtle pool.								1983-02-04	4	2	1983				Tree, c. 12 m. Flowers and buds greenish brown.	MO	2018	D. Santamaría-Aguilar
G. Rivera, C. Valverde, J. Hoomans & E. Esquivel	2070		Virola sebifera	Virola sebifera Aubl.	Virola	sebifera	Myristicaceae	Mesoamerica	Costa Rica	Cartago	Turrialba	Pradera de los bordes del Río Lajitas					09°58'29"N 083°41'32"W	9.97472	-83.6922	1993-02-18	18	2	1993				Arbusto 8 m de altura. Hojas por el envés ferrugíneo. Floración ferrugínea.	MO	2018	D. Santamaría-Aguilar
M. Segura & F. J. Quesada	156		Virola sebifera	Virola sebifera Aubl.	Virola	sebifera	Myristicaceae	Mesoamerica	Costa Rica	Puntarenas	Golfito	P.N. Corcovado. Valle de Coto Colorado. Estación Esquinas; Sección Esquinas.	100 m	100		m	08°46'00"N 083°15'00"W	8.76667	-83.25	1993-08-25	25	8	1993				Árbol de 8 m. Frutos verde-pardo.	MO	2018	D. Santamaría-Aguilar
R. Espinoza	803		Virola sebifera	Virola sebifera Aubl.	Virola	sebifera	Myristicaceae	Mesoamerica	Costa Rica	Alajuela	Upala	Parque Nacional Guanacaste, Cordillera de Guanacaste, Estación San Ramón, Dos Ríos, Sendero El Nispero	550 m	550		m	10°52'50"N 085°24'05"W	10.8806	-85.4014	1993-03-16	16	3	1993				Árbol de 8 m. Inflorescencia café y roja. Botones florales cerrados.	MO	2018	D. Santamaría-Aguilar
M. M. Chavarría	292		Virola sebifera	Virola sebifera Aubl.	Virola	sebifera	Myristicaceae	Mesoamerica	Costa Rica	Puntarenas	Golfito	Punta Burica. Punta Banco.	0 - 100 m	0	100	m	08°22'10"N 083°08'50"W	8.36944	-83.1472	1988-08-22	22	8	1988				Árbol de 7 m, muy parecido a la virola. Frutos dehiscentes en dos con arilo rojo, pequeños a la mitad del tamaño de los del fruta dorada.	MO	2018	D. Santamaría-Aguilar
F. Araya	766		Virola sebifera	Virola sebifera Aubl.	Virola	sebifera	Myristicaceae	Mesoamerica	Costa Rica	Limón	Pococí	R.N.F.S. Barra del Colorado. Llanura de Tortuguero. Sardinas.	15 - 20 m	15	20	m	10°38'38"N 083°44'10"W	10.6439	-83.7361	1995-03-01	1	3	1995				Árbol de 12 m. Flores anaranjadas.	MO	2018	D. Santamaría-Aguilar
F. Almeda & et al.	5553		Virola sebifera	Virola sebifera Aubl.	Virola	sebifera	Myristicaceae	Mesoamerica	Costa Rica	Puntarenas		Marenco Biological Station on the NW coast of the Osa Peninsula. NE sector of the Sendero Camino Publico. Rainforest	60 - 120 m	60	120	m	08°40'12"N 083°42'00"W	8.67	-83.7	1986-03-13	13	3	1986				Tree 30 ft tall; rachis of inflorescence and calyx rusty brown	MO	2018	D. Santamaría-Aguilar
B. E. Hammel & J. Trainer	10836		Virola sebifera	Virola sebifera Aubl.	Virola	sebifera	Myristicaceae	Mesoamerica	Costa Rica	Heredia		Finca La Selva, the OTS field station on the Río Puerto Viejo just E of its junction with the Río Sarapiquí.	100 m	100		m	10°25'53"N 084°00'13"W	10.4314	-84.0036	1981-06-08	8	6	1981				Windfall from tree 25 m tall; fruits globose.	MO	2018	D. Santamaría-Aguilar
J. F. Morales & R. J. Abarca	6896		Virola sebifera	Virola sebifera Aubl.	Virola	sebifera	Myristicaceae	Mesoamerica	Costa Rica	Puntarenas	Golfito	Punta Burica. Punta Banco, Peninsula Burica, bosques entre Quebrada Pita y Quebrada nicaragua.	0-100 m	0	100	m	08°22'09"N 083°08'32"W	8.36916	-83.1422	1998-12-20	20	12	1998				Arbol de 7 m. Flores marron.	MO	2018	D. Santamaría-Aguilar
E. Mora	1155		Virola sebifera	Virola sebifera Aubl.	Virola	sebifera	Myristicaceae	Mesoamerica	Costa Rica	Limón	Matina	Parque Nacional Barbilla. Cuenca del Matina. Sector Colonia Puriscaleña. Sendero Azul hasta Río Surubres.	300 - 400 m	300	400	m	09°59'30"N 083°22'40"W	9.99167	-83.3778	2000-05-22	22	5	2000				Árbol de 15 m x 40 cm DAP. Flores verde-amarillento.	MO	2018	D. Santamaría-Aguilar
J. P. Folsom	9317		Virola sebifera	Virola sebifera Aubl.	Virola	sebifera	Myristicaceae	Mesoamerica	Costa Rica	Heredia		La Selva Biological Station.	100 m	100		m	10°25'53"N 084°00'13"W	10.4314	-84.0036	1981-03-13	13	3	1981				Subcanopy tree; young twigs, lower leaf surfaces and green fruit entirely covered with scurfy brown pubescence.	MO	2018	D. Santamaría-Aguilar
I. Chacón	749		Virola sebifera	Virola sebifera Aubl.	Virola	sebifera	Myristicaceae	Mesoamerica	Costa Rica	Heredia		Finca La Selva, the OTS Field Station on the Río Puerto Viejo just E of its junction with the Río Sarapiquí.	100 m	100		m				1983-05-11	11	5	1983				Árbol caido en el Pejibayal. Árbol de 12 m de alto, DAP 10 cm, frutos con pubescencia ferrugínea, secreción de color blanco.	MO	2018	D. Santamaría-Aguilar
J. P. Folsom	10146		Virola sebifera	Virola sebifera Aubl.	Virola	sebifera	Myristicaceae	Mesoamerica	Costa Rica	Heredia		La Selva Biological Station.	100 m	100		m	10°25'53"N 084°00'13"W	10.4314	-84.0036	1981-05-21	21	5	1981				Tree of 15-20 m, 25-30 cm dbh, scurfy redbrown on lower leaf and twig surfaces, thickest as a removable coating from fruit.	MO	2018	D. Santamaría-Aguilar
O. Vargas	658		Virola sebifera	Virola sebifera Aubl.	Virola	sebifera	Myristicaceae	Mesoamerica	Costa Rica	Heredia	Sarapiqui	La Selva Biological Station. Sendero: STR 1050m. 260º, 6 m.	100 m	100		m	10°25'53"N 084°00'13"W	10.4314	-84.0036	2001-05-04	4	5	2001				Arbol, alt. 15 m., 18 cm. DAP. Frutos inmaduros color cafe. Hojas con pubescencia ferrugínea estrellada, especialmente en el envés.	MO	2018	D. Santamaría-Aguilar
R. Aguilar	RA008499		Virola sebifera	Virola sebifera Aubl.	Virola	sebifera	Myristicaceae	Mesoamerica	Costa Rica	Heredia	Sarapiqui	La Selva Biological Station.	100 m	100		m	10°25'53"N 084°00'13"W	10.4314	-84.0036	2004-04-02	2	4	2004				Arbol, alt. 15 m., 20 cm. DAP. Frutos inmaduros ferrugíneos	MO	2018	D. Santamaría-Aguilar
A. Soto & D. Santamaría	409		Virola sebifera	Virola sebifera Aubl.	Virola	sebifera	Myristicaceae	Mesoamerica	Costa Rica	San José	Turrubares	No protegida. Cuenca del Tárcoles. San Rafael de Turrubares, 4 km antes del pueblo.	600 - 700 m	600	700	m	09°49'27"N 084°27'26"W	9.82417	-84.4572	2004-12-08	8	12	2004				Árbol de 12 m de altura, con frutos.	CR, MO	2018	D. Santamaría-Aguilar
G. Herrera	10234		Virola sebifera	Virola sebifera Aubl.	Virola	sebifera	Myristicaceae	Mesoamerica	Costa Rica	Puntarenas	Garabito	R.V.S. Playa Hermosa. Cuenca del Tulín. Playa Hermosa. Alto del Nance.	0 - 100 m	0	100	m	09°33'17"N 084°34'32"W	9.55472	-84.5756	2006-02-01	1	2	2006				Árbol de 11 m x 30 cm DAP. Corteza grisácea con fisuras muy finas. Látex rojo café. Copa pequeña de ramitas delgadas. Follaje suave con el envés gris, conspicuo; haz brillante verde ferrugíneo. Flores amarillo verde. Frutos inmaduros verdes con pubescencia café rojo.	CR, MO	2018	D. Santamaría-Aguilar
J. F. Morales	8005		Virola sebifera	Virola sebifera Aubl.	Virola	sebifera	Myristicaceae	Mesoamerica	Costa Rica	Limón	Talamanca	No protegida. Puerto Viejo. Fila Carbón, San Rafael, vereda a Bocuares.	150 - 200 m	150	200	m	09°43'00"N 082°55'00"W	9.71667	-82.9167	2001-05-05	5	5	2001				Árbol de 12 m. Frutos marrón.	CR, MO	2018	D. Santamaría-Aguilar
A. Rodríguez	9046		Virola sebifera	Virola sebifera Aubl.	Virola	sebifera	Myristicaceae	Mesoamerica	Costa Rica	Alajuela	San Carlos	No protegida. Cuenca del San Carlos. San Carlos, Fortuna. R. B. Arenal Mundo Aventura.	255 - 400 m	255	400	m	10°27'10"N 084°39'30"W	10.4528	-84.6583	2004-05-27	27	5	2004				Árbol de 10 m. Frutos verde-ferrugíneos.	CR, MO	2018	D. Santamaría-Aguilar
J. F. Morales	9142		Virola sebifera	Virola sebifera Aubl.	Virola	sebifera	Myristicaceae	Mesoamerica	Costa Rica	Puntarenas	Aguirre	No protegida. Cuenca del Savegre. Fila Brujo, Cabeceras Quebrada Peje, cuenca Río Savegre.	400 - 600 m	400	600	m	09°25'00"N 083°58'20"W	9.41667	-83.9722	2003-02-24	24	2	2003				Árbol de 8 m. Flores crema.	CR, MO	2018	D. Santamaría-Aguilar
R. Aguilar	11319		Virola sebifera	Virola sebifera Aubl.	Virola	sebifera	Myristicaceae	Mesoamerica	Costa Rica	Puntarenas	Osa	Distrito: Cortés; Palmar Norte, entre Ciudad Cortez y Dominical, Piñuelas arriba, finca de Vidal Jiménez.	185 m	185		m	09°06'53"N 083°40'54"W	9.11472	-83.6817	2008-08-25	25	8	2008				Arbol 10 m., 10 cm. Frutos verdes, cubiertos por una pubescencia ferruginea.	MO	2018	D. Santamaría-Aguilar
R. L. Jones & H. Jiménez-Saa	9833		Virola sebifera	Virola sebifera Aubl.	Virola	sebifera	Myristicaceae	Mesoamerica	Costa Rica	San José		Alexander Skutch Bird Refuge, Los Cusingos, Pérez Zeledón, along western border, forest edge next to cemetery.	740 m	740		m	09°20'00"N 083°37'48"W - 09°20'23"N 083°37'48"W	9.33333	-83.63	2007-01-27	27	1	2007					MO	2018	D. Santamaría-Aguilar
A. F. Skutch	3118		Virola sebifera	Virola sebifera Aubl.	Virola	sebifera	Myristicaceae	Mesoamerica	Costa Rica	San José		Vicinity of El General.	915 m	915		m	09°22'19"N 083°42'14"W	9.37194	-83.7039	1937-05-01		5	1937				Forest tree 30 m; fls. dull orange.	MO	2018	D. Santamaría-Aguilar
L. D. Gómez	19479		Virola sebifera	Virola sebifera Aubl.	Virola	sebifera	Myristicaceae	Mesoamerica	Costa Rica	Puntarenas	Osa	Road to Puerto Jimenez, 40 km west of Interamerica Route 2	100 m	100		m	08°38'24"N 083°27'00"W	8.64	-83.45								Tree 10 m. Flowers lemon-scented during daylight only.	MO	2018	D. Santamaría-Aguilar
G. W. Frankie	215a		Virola sebifera	Virola sebifera Aubl.	Virola	sebifera	Myristicaceae	Mesoamerica	Costa Rica	Heredia	Sarapiqui	Finca La Selva, Puerto Viejo.	90 m	90		m	10°25'53"N 084°00'13"W	10.4314	-84.0036	1969-07-06	6	7	1969				Flow. Color: light brown. Life Form, Size: tree ~ 75'. Rel. Abun.: Common.	MO	2018	D. Santamaría-Aguilar
D. A. Smith	1088		Virola sebifera	Virola sebifera Aubl.	Virola	sebifera	Myristicaceae	Mesoamerica	Costa Rica	Heredia	Sarapiqui	Pastures along road between Finca La Selva and Puerto Viejo.					10°26'39"N 084°00'11"W	10.4442	-84.0031	1984-07-09	9	7	1984				Tree about 15 m tall in pasture. Leaves slightly reddish beneath, fruits ferrugineous, aril bright red.	MO	2018	D. Santamaría-Aguilar
R. W. Lent	2329		Virola sebifera	Virola sebifera Aubl.	Virola	sebifera	Myristicaceae	Mesoamerica	Costa Rica	Heredia	Sarapiqui	Primary forest, Istarú Farm, Tirimbina	220 m	220		m	10°23'24"N 084°06'00"W	10.39	-84.1	1972-01-28	28	1	1972				Tree of 25 m. Flowers orange, aromatic.	MO	2018	D. Santamaría-Aguilar
K. S. Bawa	537		Virola sebifera	Virola sebifera Aubl.	Virola	sebifera	Myristicaceae	Mesoamerica	Costa Rica	Heredia	Sarapiqui	Finca La Selva, wet evergreen forest	200 m	200		m	10°25'12"N 084°01'12"W	10.42	-84.02	1970-01-23	23	1	1970				Large tree, common.	MO	2018	D. Santamaría-Aguilar
W. R. Barbour	1015		Virola sebifera	Virola sebifera Aubl.	Virola	sebifera	Myristicaceae	Mesoamerica	Costa Rica	Cartago		Jaime Aguilar forest tract 1 mile w. of P.A.H'way from a point about 5 kilom. s. of San Isidro del General. Slope: Level.	2000 ft	2000		f				1943-09-06	6	9	1943				Candelo. Height: 60 ft. D. B. H.: 8 in. Size up to: over 14 in D. B. H. Wood samples taken. In fruit.	MO	2018	D. Santamaría-Aguilar
G. E. Schatz & B. Bockbrader	1037		Virola sebifera	Virola sebifera Aubl.	Virola	sebifera	Myristicaceae	Mesoamerica	Costa Rica	Heredia	Sarapiqui	La Selva Biological Station, approx. 4 km S of Puerto Viejo de Sarapiquí.	35 - 150 m	35	150	m	10°26'N 084°01'W	10.4333	-84.0167	1985-02-15	15	2	1985				Branch fall from tree 20 m tall at Camino Experimental 350. Flowers golden bronze.	MO	2018	D. Santamaría-Aguilar
W. Huber & A. Weissenhofer	165		Virola sebifera	Virola sebifera Aubl.	Virola	sebifera	Myristicaceae	Mesoamerica	Costa Rica	Puntarenas	Golfito	Sección "Bosque de los Austriacos" RESEARCH PLOT.	300 m	300		m	08°41'N 083°13'W	8.68333	-83.2167	1994-01-16	16	1	1994				Life form: tree. Height: 15 m. Flower: dark yellow.	MO	2018	D. Santamaría-Aguilar
W. C. Burger & J. Gómez-Laurito	12030		Virola sebifera	Virola sebifera Aubl.	Virola	sebifera	Myristicaceae	Mesoamerica	Costa Rica	Cartago	Jiménez	Wet evergreen premontane rain forest in the El Zapote nature reserve, 5 km. south of Turrialba.	700 m	700		m	09°48'N 083°41'W			1987-03-01	1	3	1987				Tree in pasture, ca. 20 m tall, with smooth barked trunk, leaves orange-brown beneath, medium to dark green above	CR, MEXU*	2018	D. Santamaría-Aguilar
P. R. House	2032		Virola sebifera	Virola sebifera Aubl.	Virola	sebifera	Myristicaceae	Mesoamerica	Honduras	Gracias a Dios		30 minutos al oeste de Krausirpe. Transecto Botanico.	90 m	90		m	15°03'N 084°50'W	15.05	-84.8333	17 marzo 1994	17	3	1994				Árbol de 8 m. "Walus."	MO	2018	D. Santamaría-Aguilar
P. R. House	2351		Virola sebifera	Virola sebifera Aubl.	Virola	sebifera	Myristicaceae	Mesoamerica	Honduras	Gracias a Dios	Brus Laguna	Bosque primario, 30 min al sur de Krausirpe, Río Patuca	90 m	90		m	15°03'N 084°50'W	15.05	-84.8333	25 marzo 1995	25	3	1995				Árbol de 30 m.	MO	2018	D. Santamaría-Aguilar
P. R. House & A. Cubas	2814		Virola sebifera	Virola sebifera Aubl.	Virola	sebifera	Myristicaceae	Mesoamerica	Honduras	Gracias a Dios		30 minutos al sur de Krausirpe, Río Patuca. Transecto botanico.	90 m	90		m	15°03'N 084°50'W	15.05	-84.8333	11 mayo 1994	11	5	1994				Árbol de 20 m. "Walus" leche para mal de boca. Fruta comen las jaguillas y pavas.	MO	2018	D. Santamaría-Aguilar
P. R. House	2019		Virola sebifera	Virola sebifera Aubl.	Virola	sebifera	Myristicaceae	Mesoamerica	Honduras	Gracias a Dios		Monte alto de Anastasio. 30 minutos oeste de Krausirpe.	90 m	90		m	15°03'N 084°50'W	15.05	-84.8333	17 marzo 1994	17	3	1994				Árbol de 10 m. "Walus."	MO	2018	D. Santamaría-Aguilar
P. R. House	2001		Virola sebifera	Virola sebifera Aubl.	Virola	sebifera	Myristicaceae	Mesoamerica	Honduras	Gracias a Dios		Lado del Dapawas. Transecto Botanico. 40 minutoss al norte de Krausirpe.	90 m	90		m	15°03'N 084°50'W	15.05	-84.8333	12 marzo 1994	12	3	1994				Árbol de 30 m.	MO	2018	D. Santamaría-Aguilar
P. R. House	2131		Virola sebifera	Virola sebifera Aubl.	Virola	sebifera	Myristicaceae	Mesoamerica	Honduras	Gracias a Dios		Transecto Botanico. 40 minutos al norte de Krausirpe.	90 m	90		m	15°03'N 084°50'W	15.05	-84.8333	13 septiembre 1994	13	9	1994				Árbol de 20 m. "Walus" para leña, leche para granos.	MO	2018	D. Santamaría-Aguilar
F. Ortíz	1971		Virola sebifera	Virola sebifera Aubl.	Virola	sebifera	Myristicaceae	Mesoamerica	Nicaragua	Atlántico Norte		La Pimienta, Municipio de Siuna	150 m	150		m	13°39'30"N 084°59'00"W	13.6583	-84.9833	1 junio 1984	1	6	1984				Arbol, 10 m de alto. n.c. "cebo"	MO	2018	D. Santamaría-Aguilar
J. J. Pipoly	3844		Virola sebifera	Virola sebifera Aubl.	Virola	sebifera	Myristicaceae	Mesoamerica	Nicaragua	Atlántico Norte		13 km above Kururia on road to San Jerónimo.	150 - 200 m	150	200	m	14°40'N 084°07'W	14.6667	-84.1167	1979-03-02	2	3	1979					MO	2018	D. Santamaría-Aguilar
F. Ortíz	579		Virola sebifera	Virola sebifera Aubl.	Virola	sebifera	Myristicaceae	Mesoamerica	Nicaragua	Atlántico Norte		Municipio de Siuna, El Hormiguero	100 - 120 m	100	120	m	13°44'30"N 084°50'30"W	13.7417	-84.8417	7 enero 1983	7	1	1983					MO	2018	D. Santamaría-Aguilar
F. Ortíz	867		Virola sebifera	Virola sebifera Aubl.	Virola	sebifera	Myristicaceae	Mesoamerica	Nicaragua	Atlántico Norte		Municipio de Siuna, El Hormiguero	100 - 120 m	100	120	m	13°44'30"N 085°03'30"W	13.7417	-85.0583	5 febrero 1983	5	2	1983					MO	2018	D. Santamaría-Aguilar
P. P. Moreno	22979		Virola sebifera	Virola sebifera Aubl.	Virola	sebifera	Myristicaceae	Mesoamerica	Nicaragua	Río San Juan		Buenos Aires en la ribera del Río Sábalos	50 m	50		m	11°02'N 084°28'W	11.0333	-84.4667	17 febrero 1984	17	2	1984				Arbusto, 2 m de alto, frutos café. n.c. "cebo"	MO	2018	D. Santamaría-Aguilar
P. P. Moreno & W. Robleto	20727		Virola sebifera	Virola sebifera Aubl.	Virola	sebifera	Myristicaceae	Mesoamerica	Nicaragua	Atlántico Norte		El Dos, Siuna.	320 - 380 m	320	380	m	13°49'N 084°38'W	13.8167	-84.6333	25 febrero 1983	25	2	1983				Arbol 8 m de alto, inflorescencia café, hoja con haz verde, envés café.	MO	2018	D. Santamaría-Aguilar
P. P. Moreno	25639		Virola sebifera	Virola sebifera Aubl.	Virola	sebifera	Myristicaceae	Mesoamerica	Nicaragua	Río San Juan		Boca de Sábalo, camino a Buenavista	70 m	70		m	11°02'30"N 084°28'00"W	11.0417	-84.4667	24 marzo 1985	24	3	1985				Arbol, 40 m de alto, inflorescencia café.	MO	2018	D. Santamaría-Aguilar
P. P. Moreno	23328		Virola sebifera	Virola sebifera Aubl.	Virola	sebifera	Myristicaceae	Mesoamerica	Nicaragua	Río San Juan		2 km al NW del Río Santa Cruz	70 m	70		m	11°03'N 084°25'W	11.05	-84.4167	24 febrero 1984	24	2	1984				Arbol, 20 m de alto, flores en yema café, frutos café. n.c. "cebo"	MO	2018	D. Santamaría-Aguilar
P. P. Moreno & W. Robleto	25967		Virola sebifera	Virola sebifera Aubl.	Virola	sebifera	Myristicaceae	Mesoamerica	Nicaragua	Río San Juan		Sobre el Río Sábalo	40 m	40		m	11°03'N 084°28'W	11.05	-84.4667	7 julio 1984 - 8 julio 1984	7	7	1984	8	7	1984	Arbol, 12 m de alto, frutos cafe.	MO	2018	D. Santamaría-Aguilar
P. P. Moreno	23698		Virola sebifera	Virola sebifera Aubl.	Virola	sebifera	Myristicaceae	Mesoamerica	Nicaragua	Atlántico Sur		Kurinwacito	80 - 100 m	80	100	m	13°08'N 084°55'W	13.1333	-84.9167	18 marzo 1984 - 22 marzo 1984	18	3	1984	22	3	1984	Arbol, 8 m de alto, inflorescencia café.	MO	2018	D. Santamaría-Aguilar
P. P. Moreno	23763		Virola sebifera	Virola sebifera Aubl.	Virola	sebifera	Myristicaceae	Mesoamerica	Nicaragua	Atlántico Sur		Kurinwacito	80 - 100 m	80	100	m	13°08'N 084°55'W	13.1333	-84.9167	18 marzo 1984 - 22 marzo 1984	18	3	1984	22	3	1984	Arbol, 15 m de alto, flores en yema café.	MO	2018	D. Santamaría-Aguilar
P. P. Moreno & J.C. Sandino	13024-B		Virola sebifera	Virola sebifera Aubl.	Virola	sebifera	Myristicaceae	Mesoamerica	Nicaragua	Atlántico Sur		Río Punta Gorda, Atlanta, "La Richard" 200 m al SE	20 m	20		m	11°32'N 084°05'W	11.5333	-84.0833	13 noviembre 1981	13	11	1981				Arbusto 2 m alto, flores en yema.	MO	2018	D. Santamaría-Aguilar
P. P. Moreno & J.C. Sandino	12143		Virola sebifera	Virola sebifera Aubl.	Virola	sebifera	Myristicaceae	Mesoamerica	Nicaragua	Atlántico Sur		Monkey Point, lado S del campo de aterrizaje abandonado; pluvioselva	10 m	10		m	11°36'10"N 083°40'05"W	11.6028	-83.6681	22 octubre 1981	22	10	1981				Arbol pequeno de 3 a 4 m alto, flores en yema, hoja envez verde, haz cafe.	MO	2018	D. Santamaría-Aguilar
J. C. Sandino	4767		Virola sebifera	Virola sebifera Aubl.	Virola	sebifera	Myristicaceae	Mesoamerica	Nicaragua	Atlántico Sur		El Zapote, 40 km NE de Nueva Guinea, camino NE de San Martín	130 - 150 m	130	150	m	11°49'N 084°23'W	11.8167	-84.3833	27 febrero 1984	27	2	1984				Arbol, 15 m de alto, 25 cm dap, corteza escamosa en placas pequeñas, savia roja, nervadura, pecíolo y ramitas con puberulencia ferruginosa, flores amari- llas. n.c. "sebo"	MO	2018	D. Santamaría-Aguilar
P. P. Moreno	23886		Virola sebifera	Virola sebifera Aubl.	Virola	sebifera	Myristicaceae	Mesoamerica	Nicaragua	Atlántico Sur		Kurinwasito, Mulukuku	80 m	80		m	13°09'N 084°58'W	13.15	-84.9667	24 marzo 1984	24	3	1984				Arbol, 20 m de alto, flores en yema café.	MO	2018	D. Santamaría-Aguilar
J. C. Sandino	4850		Virola sebifera	Virola sebifera Aubl.	Virola	sebifera	Myristicaceae	Mesoamerica	Nicaragua	Atlántico Sur		Kurinwasito, 50 km SE de Río Blanco; bosque tropical húmedo	150 m	150		m	12°34'00"N 084°41'30"W	12.5667	-84.6917	15 marzo 1984	15	3	1984				Arbol, 20 m de alto, 40 cm dap, savia roja, ramas y hojas con pubescencias ferruginosa; yemas amarillas, frutos café, puberulentos. n.c. "sebo"	MO	2018	D. Santamaría-Aguilar
R.M. Rueda, A. Grijalva P. & A. Rodríguez	1454		Virola sebifera	Virola sebifera Aubl.	Virola	sebifera	Myristicaceae	Mesoamerica	Nicaragua	Atlántico Norte		Municipio Rosita: 40 km al NE de Rosita. (Bloque Waspado).	50 - 100 m	50	100	m	14°08'58"N 084°16'00"W	14.1494	-84.2667	21 Mayo 1994	21	5	1994				Arbol 25 m; frutos cafés. NC. Cebo.	MO	2018	D. Santamaría-Aguilar
R.M. Rueda, B. Hernández & E. Palma	1851		Virola sebifera	Virola sebifera Aubl.	Virola	sebifera	Myristicaceae	Mesoamerica	Nicaragua	Río San Juan		Entre el Pueblo de San Juan del Norte Nuevo y La casa de Ramón Castillo Viajando por el Caño San Juanillo.	5 m	0	5	m	10°55'N 083°49'W	10.9167	-83.8167	7 Julio 1994	7	7	1994				Arbol 12 m; frutos anaranjados, rojos internomente.	MO	2018	D. Santamaría-Aguilar
R.M. Rueda, E. Palma & B. Hernández	2596		Virola sebifera	Virola sebifera Aubl.	Virola	sebifera	Myristicaceae	Mesoamerica	Nicaragua	Río San Juan		Greytown, Caño Top House y el último creek a la derecha viniendo a Greytown, Lagunas de San Juan Viejo, y en los alrededres de Greytown Nuevo	0 - 5 m	0	5	m	11°03'N 083°50'W	11.05	-83.8333	6 Enero 1995	6	1	1995				Arbol 12 m; flores amarillentas.	MO	2018	D. Santamaría-Aguilar
R.M. Rueda, B. Hernández & I. Coronado G.	3288		Virola sebifera	Virola sebifera Aubl.	Virola	sebifera	Myristicaceae	Mesoamerica	Nicaragua	Atlántico Sur		Este del poblado de Nueva Atlanta.	10 - 20 m	10	20	m	11°35'N 084°00'W	11.5833	-84	20 febrero 1994	20	2	1994				Arbol, 15 m; frutos café.	MO	2018	D. Santamaría-Aguilar
R.M. Rueda, B. Hernández & I. Coronado G.	3431		Virola sebifera	Virola sebifera Aubl.	Virola	sebifera	Myristicaceae	Mesoamerica	Nicaragua	Atlántico Sur		Río Punta Gorda, al este del la Corriente la Guitarrona.	50 - 100 m	50	100	m	11°31'N 084°10'W	11.5167	-84.1667	24 Febrero 1994	24	2	1994				Arbol 20 m; flores café.	MO	2018	D. Santamaría-Aguilar
W. D. Stevens	8644		Virola sebifera	Virola sebifera Aubl.	Virola	sebifera	Myristicaceae	Mesoamerica	Nicaragua	Atlántico Norte		Ca. 14.5 km W of Río Wawa ferry on road from Puerto Cabezas to Rosita, at (Caño) Kauhru Tingni; roadside and disturbed forest along stream.	10 m	10		m	14°06'N 083°40'W	14.1	-83.6667	1978-05-02	2	5	1978					MO	2018	D. Santamaría-Aguilar
F. Coe	2402		Virola sebifera	Virola sebifera Aubl.	Virola	sebifera	Myristicaceae	Mesoamerica	Nicaragua	Atlántico Sur		Pistu Tingni River, small tributary of Wawashen River	15 m	15		m	12°37'N 083°50'W	12.6167	-83.8333	1992-07-07	7	7	1992				Banak, medicine	MO	2018	D. Santamaría-Aguilar
R.M. Rueda, P. E. Sánchez V. & A. Grijalva P.	7465		Virola sebifera	Virola sebifera Aubl.	Virola	sebifera	Myristicaceae	Mesoamerica	Nicaragua	Río San Juan		Municipio el Castillo, Estació n Biológica La Lupe.	200 m	200		m	11°08'N 084°38'W	11.1333	-84.6333	26 octubre 1997	26	10	1997				Arbol 15 m, estéril. NC: conchillo.	MO	2018	D. Santamaría-Aguilar
R.M. Rueda & I. Coronado G.	7678		Virola sebifera	Virola sebifera Aubl.	Virola	sebifera	Myristicaceae	Mesoamerica	Nicaragua	Atlántico Norte		Reserva de Bosawas, Municipio de Waspan, Cerro Coco Mina	450 - 488 m	450	488	m	14°35'N 084°47'W	14.5833	-84.7833	27 noviembre 1997	27	11	1997				Arbol 15 m, flores café. NC: cebo.	MO	2018	D. Santamaría-Aguilar
R.M. Rueda, F. Flores, W. Velásquez & O. Caballero	9271		Virola sebifera	Virola sebifera Aubl.	Virola	sebifera	Myristicaceae	Mesoamerica	Nicaragua	Río San Juan		Municipio el Castillo, Reserva Indio-Maiz, Cerro Bolívar.	150 - 280 m	150	280	m	10°51'N 084°10'W	10.85	-84.1667	30 noviembre 1998	30	11	1998				Arbol 20 m; flores amarillentas.	MO	2018	D. Santamaría-Aguilar
R.M. Rueda, I. Coronado G., O. Caballero & L. Ruíz	9848		Virola sebifera	Virola sebifera Aubl.	Virola	sebifera	Myristicaceae	Mesoamerica	Nicaragua	Atlántico Sur		Municipio de Nueva Guinea Reserva Indio-Maiz, colinas de piedra fina.	200 - 300 m	200	300	m	11°25'N 084°13'W	11.4167	-84.2167	5 enero 1999	5	1	1999				Arbol 15 m; flores café.	MO	2018	D. Santamaría-Aguilar
R.M. Rueda, I. Coronado G., O. Caballero & L. Ruíz	9853		Virola sebifera	Virola sebifera Aubl.	Virola	sebifera	Myristicaceae	Mesoamerica	Nicaragua	Atlántico Sur		Municipio de Nueva Guinea Reserva Indio-Maiz, colinas de piedra fina.	200 - 300 m	200	300	m	11°25'N 084°13'W	11.4167	-84.2167	5 enero 1999	5	1	1999				Arbol 15 m; flores amarillentas.	MO	2018	D. Santamaría-Aguilar
R.M. Rueda, I. Coronado G., O. Caballero & L. Ruíz	10137		Virola sebifera	Virola sebifera Aubl.	Virola	sebifera	Myristicaceae	Mesoamerica	Nicaragua	Atlántico Sur		Municipio de Nueva Guinea, Reserva Indio-Maiz, Río Pijibaye entre el Caño Bijagua y el Cerro Chiripa	200 - 350 m	200	350	m	11°22'N 084°01'W	11.3667	-84.0167	15 enero 1999	15	1	1999				Arbol 15 m; flores amarillentas.	MO	2018	D. Santamaría-Aguilar
R.M. Rueda, I. Coronado G., F. Flores & W. Velásquez	10318		Virola sebifera	Virola sebifera Aubl.	Virola	sebifera	Myristicaceae	Mesoamerica	Nicaragua	Río San Juan		Municipio de el Castillo, Reserva Indio-Maíz, zona de amortiguamiento, estación biológica La Lupe.	100 - 200 m	100	200	m	11°08'N 084°21'W	11.1333	-84.35	15 Marzo 1999	15	3	1999				Arbol 25 m; frutos café.	MO	2018	D. Santamaría-Aguilar
D. A. Neill	4279		Virola sebifera	Virola sebifera Aubl.	Virola	sebifera	Myristicaceae	Mesoamerica	Nicaragua	Atlántico Norte		Comarca Waylawás, 10 km S of Siuna; second-growth forest	100 m	100		m	13°39'N 084°48'W	13.65	-84.8	1978-06-06	6	6	1978					MO	2018	D. Santamaría-Aguilar
D. A. Neill	4183		Virola sebifera	Virola sebifera Aubl.	Virola	sebifera	Myristicaceae	Mesoamerica	Nicaragua	Atlántico Norte		3 km W of Kuikuinita, S of Siuna; wet forest	120 m	120		m	13°26'N 084°50'W	13.4333	-84.8333	1978-05-24	24	5	1978					MO	2018	D. Santamaría-Aguilar
I. Coronado G., Daniel M. Griffith, A. Chain, M. Barrios & F. Moncada	2949		Virola sebifera	Virola sebifera Aubl.	Virola	sebifera	Myristicaceae	Mesoamerica	Nicaragua	Jinotega		Municipio de Wiwili, zona de amortigüamiento de Bosawas, Comunidad de Walakitan, Wispil; Transecto 11, ubicado en zona agrícola (Tilba tingni)	170 m	170		m	14°31'12"N 085°04'03"W	14.52	-85.0675	18 Enero 2006	18	1	2006				T11 P8 5x5 m. Árbol 15 m; flores amarillentas. N.C.: Cebo. USO: Construcción.	MO	2018	D. Santamaría-Aguilar
I. Coronado G., M. Barrios, G. Pérez & F. Moncada	3388		Virola sebifera	Virola sebifera Aubl.	Virola	sebifera	Myristicaceae	Mesoamerica	Nicaragua	Jinotega		Municipio de Wiwili, Reserva de Bosawas, comunidad de San Andrés, Río Coco, Caño Uran	220 m	220		m	14°20'N 085°09'W	14.3333	-85.15	9 Febrero 2006	9	2	2006				Árbol 17 m; flores cafés. N.C. Cebo macho.	MO	2018	D. Santamaría-Aguilar
R. Loredo	2348		Virola sebifera	Virola sebifera Aubl.	Virola	sebifera	Myristicaceae	Mesoamerica	Nicaragua	Río San Juan		Municipio El Catillo, Finca de Madrid, 1 km al S de Las Maravillas	100 m	100		m	11°07'15"N 084°21'04"W	11.1208	-84.3511	18 Enero 2005 - 25 Enero 2005	18	1	2005	25	1	2005	Arbol 6 m, flores amarillas	MO	2018	D. Santamaría-Aguilar
I. Coronado G. & A. Fernández	3969		Virola sebifera	Virola sebifera Aubl.	Virola	sebifera	Myristicaceae	Mesoamerica	Nicaragua	Jinotega		Municipio de Wiwilí, Reserva Biológica de BOSAWAS, comunidad de Inipuwas, area de caceria, Transecto Ialnú	170 m	170		m	14°24'N 085°09'W	14.4	-85.15	2007-06-09	9	6	2007				Arbol 7 m; frutos café. N.C.: Cebito.	MO	2018	D. Santamaría-Aguilar
I. Coronado G. & A. Fernández	4241		Virola sebifera	Virola sebifera Aubl.	Virola	sebifera	Myristicaceae	Mesoamerica	Nicaragua	Jinotega		Municipio de Wiwili. Reserva de la Biosfera de Bosawas. Transecto Wayawas, comunidad de Inipuwas.	160 m	160		m	14°24'N 085°08'W	14.4	-85.1333	23 febrero 2008	23	2	2008				Árbol 7 m; flores marrón.	MO	2018	D. Santamaría-Aguilar
D. Prado G.	35		Virola sebifera	Virola sebifera Aubl.	Virola	sebifera	Myristicaceae	Mesoamerica	Nicaragua	Jinotega		Municipio de Wiwilí, comunidad La Esperanza, Reserva Bosawas, Territorio Tasbaika Kum, parcela 2, en el tacotal, 500 m al oeste de Finca Lionidas Bodin	60 - 70 m	60	70	m	14°13'49"N 085°19'15"W	14.2303	-85.3208	22 Ago. 2007 - 24 Ago. 2007	22	8	2007	24	8	2007		MO	2018	D. Santamaría-Aguilar
C. Herrera P.	174		Virola sebifera	Virola sebifera Aubl.	Virola	sebifera	Myristicaceae	Mesoamerica	Nicaragua	Jinotega		Municipio de Wiwilí, Comunidad La Esperanza, Reserva Bosawas, Territorio Miskito Tasbaika Kum, parcela 3, zona Waola, 3 km al sur	60 - 70 m	60	70	m	14°13'49"N 085°19'15"W	14.2303	-85.3208	06 diciembre 2007	6	12	2007					MO	2018	D. Santamaría-Aguilar
E. L. Little	25092		Virola sebifera	Virola sebifera Aubl.	Virola	sebifera	Myristicaceae	Mesoamerica	Nicaragua	Atlántico Norte		Sur de Río Wawa, 60 km NO de Puerto Cabezas; bosque hidrofitico	40 m	40		m	14°19'N 083°56'W	14.3167	-83.9333	11 March 1971 - 13 March 1971	11	3	1971	13	3	1971		MO	2018	D. Santamaría-Aguilar
E. L. Little	25028		Virola sebifera	Virola sebifera Aubl.	Virola	sebifera	Myristicaceae	Mesoamerica	Nicaragua	Atlántico Norte		Slilma Sía, bosque de galeria	140 m	140		m	14°38'N 083°56'W	14.6333	-83.9333	1971-03-02	2	3	1971	3	3	1971	Arbol de 10 m, 15 cm DAP	MO	2018	D. Santamaría-Aguilar
G. C. de Nevers, H. Herrera & S. Charnley	7449		Virola sebifera	Virola sebifera Aubl.	Virola	sebifera	Myristicaceae	Mesoamerica	Panama	San Blas		Cangandí. Hills near village.	30 m	30		m	09°27'N 079°06'W	9.45	-79.1	1986-03-27	27	3	1986				Tree; DBH 25.7 cm; cuadrat #135.	MO	2018	D. Santamaría-Aguilar
C. W. Hamilton & G. Davidse	2756		Virola sebifera	Virola sebifera Aubl.	Virola	sebifera	Myristicaceae	Mesoamerica	Panama	Coclé		Caribbean side of divide at El Copé. [Coordinates on orginal label: 80º35'W, 8º45'N]	200 - 400 m	200	400	m	08°42'24"N 080°36'30"W - 08°44'00"N 080°36'31"W	8.70667	-80.6083	1983-02-04	4	2	1983				Tree 40 m; fruit green with brown outside, red aril inside.	MO	2018	D. Santamaría-Aguilar
H. Herrera & J. A. Polanco	793		Virola sebifera	Virola sebifera Aubl.	Virola	sebifera	Myristicaceae	Mesoamerica	Panama	Darién		Parque Nacional Darién, Serranía de Sapo, limite del Parque hasta la cima	300 - 800 m	300	800	m	07°58'N 078°23'W	7.96667	-78.3833	26 noviembre 1990	26	11	1990				Árbol 30 m; frutas verdes, cubierta con pubescencia chocolate; hojas con pubescencia chocolatosa en el envés.	MO	2018	D. Santamaría-Aguilar
G. McPherson	10265		Virola sebifera	Virola sebifera Aubl.	Virola	sebifera	Myristicaceae	Mesoamerica	Panama	Colón		Santa Rita Ridge, Forest about 10 road-miles from highway. [Coordinates on original label: 09°20'04"N 079°45'04"W].	500 m	500		m	09°23'N 079°40'W	9.38333	-79.6667	1987-01-13	13	1	1987				Tree 16 m; fruit green-brown, aril red.	MO	2018	D. Santamaría-Aguilar
G. McPherson	10273		Virola sebifera	Virola sebifera Aubl.	Virola	sebifera	Myristicaceae	Mesoamerica	Panama	Herrera		Road between Las Minas and El Toro.	700 - 800 m	700	800	m	07°42'04"N 080°51'04"W	7.70111	-80.8511	1987-01-23	23	1	1987				Tree 8 m; fruit green, covered with brown hairs.	MO	2018	D. Santamaría-Aguilar
G. McPherson	9754		Virola sebifera	Virola sebifera Aubl.	Virola	sebifera	Myristicaceae	Mesoamerica	Panama	Panamá		Along El Llano-Carti road, near Nussagandi.	350 m	350		m	09°15'N 079°00'W	9.25	-79	1986-07-21	21	7	1986				Tree 7 m; fruit green beneath brown hair.	MO	2018	D. Santamaría-Aguilar
G. McPherson & M. Merello	8148		Virola sebifera	Virola sebifera Aubl.	Virola	sebifera	Myristicaceae	Mesoamerica	Panama	Panamá		Along trail off Llano- Cartí road, c. 4.6 miles from junction with Pan-American Highway, 9º15'N, 79º00'W. Forest c. 350 m.	350 m	350		m	09°15'N 079°00'W	9.25	-79	26 Jan. 1986	26	1	1986				Tree 7 m; fruits green covered with brown pubescence.	MO	2018	D. Santamaría-Aguilar
G. McPherson	10930		Virola sebifera	Virola sebifera Aubl.	Virola	sebifera	Myristicaceae	Mesoamerica	Panama	Herrera		West of Las Minas, on Montosa de Chepo, vicinity of Chepo.	900 m	900		m	07°42'N 080°51'W	7.7	-80.85	1987-05-20	20	5	1987				Tree 12 m; fruit brown, the seeds whitish, covered by red aril.	MO	2018	D. Santamaría-Aguilar
M. H. Nee	7311		Virola sebifera	Virola sebifera Aubl.	Virola	sebifera	Myristicaceae	Mesoamerica	Panama	Canal Area		Secondary tropical moist forest along Pipeline Road, 4 km NW of Gamboa	50 m	50		m	09°09'07"N 079°44'11"W	9.15194	-79.7364	1973-10-09	9	10	1973				Tree; inflorescence rusty orange, sweet smelling.	MO	2018	D. Santamaría-Aguilar
T. B. Croat	7028		Virola sebifera	Virola sebifera Aubl.	Virola	sebifera	Myristicaceae	Mesoamerica	Panama	Canal Area		Barro Colorado Island, clearing at laboratory	50 m	50		m	09°09'45"N 079°50'30"W	9.1625	-79.8417	1969-01-09	9	1	1969				Tree 6 m; fruits brownish, opening in two halves to expose red aril.	MO	2018	D. Santamaría-Aguilar
R. J. Schmalzel	527		Virola sebifera	Virola sebifera Aubl.	Virola	sebifera	Myristicaceae	Mesoamerica	Panama	Canal Area		Barro Colorado Island. Laboratory Clearing	20 m	20		m	09°09'45"N 079°50'30"W	9.1625	-79.8417	1982-04-11	11	4	1982				Female tree ca 15 m tall. W of Kodak House.	MO	2018	D. Santamaría-Aguilar
R. J. Schmalzel	838		Virola sebifera	Virola sebifera Aubl.	Virola	sebifera	Myristicaceae	Mesoamerica	Panama	Canal Area		Barro Colorado Island, Lab Clearing	20 m	20		m	09°09'45"N 079°50'30"W	9.1625	-79.8417	1982-08-19	19	8	1982				Tree, flowers fragrant. Some branches already with set fruit. Near NW corner of Kodak House.	MO	2018	D. Santamaría-Aguilar
R. J. Schmalzel	706		Virola sebifera	Virola sebifera Aubl.	Virola	sebifera	Myristicaceae	Mesoamerica	Panama	Canal Area		Barro Colorado Island. Fairchild Peninsula [Salud Point]	0 - 5 m	0	5	m	09°10'26"N 079°50'04"W	9.17389	-79.8344	1982-07-26	26	7	1982				Salúd Cove.	MO	2018	D. Santamaría-Aguilar
P. M. Peterson & C. R. Annable	6619		Virola sebifera	Virola sebifera Aubl.	Virola	sebifera	Myristicaceae	Mesoamerica	Panama	Bocas del Toro		Isla San Cristóbal. 3-4 km W of Bocatorito. In moist tropical forest with Ficus	30 - 45 m	30	45	m	09°15'18"N 082°16'54"W	9.255	-82.2817	1989-02-03	3	2	1989				Tree 20 m tall	MO	2018	D. Santamaría-Aguilar
P. M. Peterson & C. R. Annable	6872		Virola sebifera	Virola sebifera Aubl.	Virola	sebifera	Myristicaceae	Mesoamerica	Panama	Bocas del Toro		Isla San Cristóbal, Bocatorito, S side of Island. Open pasture land with scattered, tropical trees.	30 m	30		m	09°13'54"N 082°16'30"W	9.23167	-82.275	1989-02-15	15	2	1989				Tree 30 m tall	MO	2018	D. Santamaría-Aguilar
W. G. D'Arcy & B. E. Hammel	12319		Virola sebifera	Virola sebifera Aubl.	Virola	sebifera	Myristicaceae	Mesoamerica	Panama	Panamá	Chepo	Forest remnant, top of ridge, Cerro Paraguito above Chepo	300 - 700 m	300	700	m	09°13'34"N 079°06'40"W	9.22611	-79.1111	1978-10-11	11	10	1978				Fruits green but brown because of indumentum, tree 7 m. tall.	MO	2018	D. Santamaría-Aguilar
J. A. Duke	8052		Virola sebifera	Virola sebifera Aubl.	Virola	sebifera	Myristicaceae	Mesoamerica	Panama	Darién		Near Pidiaque peak.	800 - 1000 ft	800	1000	f	08°40'N 078°12'W	8.66667	-78.2	1966-03-31	31	3	1966				Tree. Fruits planted.	MO	2018	D. Santamaría-Aguilar
C. L. Wilson	6		Virola sebifera	Virola sebifera Aubl.	Virola	sebifera	Myristicaceae	Mesoamerica	Panama	Canal Area		Barro Colorado Island	10 - 100 m	10	100	m	09°09'N 079°51'W	9.15	-79.85	1931-02-12	12	2	1931				Tree, shore near lab.	MO	2018	D. Santamaría-Aguilar
M. H. Nee	10664		Virola sebifera	Virola sebifera Aubl.	Virola	sebifera	Myristicaceae	Mesoamerica	Panama	Chiriquí		17 km NE of San Félix on new road to Cerro Colorado copper mines (13-14 km by road NE of bridge over Río San Félix).	1000 m	1000		m	08°23'47"N 081°46'05"W	8.39639	-81.7681	18 March 1974 - 19 March 1974	18	3	1974	19	3	1974	Tree 10 m tall; fruit brown mealy; green beneath.	MO	2018	D. Santamaría-Aguilar
E. L. Tyson, J. A. Duke & H. Loftin	3834		Virola sebifera	Virola sebifera Aubl.	Virola	sebifera	Myristicaceae	Mesoamerica	Panama	Darién		Cerro Piriaque	100 - 1000 ft	100	1000	f	08°40'00"N 078°12'30"W	8.66667	-78.2083	1966-04-23	23	4	1966				Tree, flower orange brown.	MO	2018	D. Santamaría-Aguilar
T. B. Croat	4809A		Virola sebifera	Virola sebifera Aubl.	Virola	sebifera	Myristicaceae	Mesoamerica	Panama	Canal Area		Barro Colorado Island. Shoreline north of dock area (to north of first cove).	0 - 5 m	0	5	m	09°09'50"N 079°50'05"W	9.16389	-79.8347	1968-04-15	15	4	1968				Tree, 10 m.	MO	2018	D. Santamaría-Aguilar
J. E. Ebinger	300		Virola sebifera	Virola sebifera Aubl.	Virola	sebifera	Myristicaceae	Mesoamerica	Panama	Canal Area		Barro Colorado Island.	0 - 150 m	0	150	m	09°09'N 079°51'W	9.15	-79.85	1960-02-01		2	1960				Tree 20 feet tall, fruits copper colored.	MO	2018	D. Santamaría-Aguilar
T. B. Croat	7872		Virola sebifera	Virola sebifera Aubl.	Virola	sebifera	Myristicaceae	Mesoamerica	Panama	Canal Area		Barro Colorado Island; Shoreline south of Colorado Point	0 - 5 m	0	5	m	09°09'36"N 079°49'11"W	9.16	-79.8197	1969-02-11	11	2	1969				Tree, 8 m.	MO	2018	D. Santamaría-Aguilar
M. H. Nee	11025		Virola sebifera	Virola sebifera Aubl.	Virola	sebifera	Myristicaceae	Mesoamerica	Panama	Canal Area		Secondary tropical moist forest near summit of Cerro Pelado; 1 km N of Gamboa	200 - 220 m	200	220	m	09°07'37"N 079°42'14"W	9.12694	-79.7039	1974-04-02	2	4	1974				Tree 10 m tall, 15 cm dbh; inflorescence tan-orange, fragrant.	MO	2018	D. Santamaría-Aguilar
T. B. Croat	4938		Virola sebifera	Virola sebifera Aubl.	Virola	sebifera	Myristicaceae	Mesoamerica	Panama	Canal Area		Shoreline of large cove east of Slothia Island (Bat Cove).	0 - 5 m	0	5	m	09°09'51"N 079°49'50"W	9.16417	-79.8306	1968-04-18	18	4	1968				Tree, 6 m.	MO	2018	D. Santamaría-Aguilar
J. P. Folsom	2846		Virola sebifera	Virola sebifera Aubl.	Virola	sebifera	Myristicaceae	Mesoamerica	Panama	Canal Area		Pipeline Road	50 - 100 m	50	100	m	09°10'N 079°46'W	9.16667	-79.7667	1977-04-29	29	4	1977				Tree of about 10 m, 8-10 inches in diameter; spicey aroma. On Pipeline road, at its beginning just outside Gamboa.	MO	2018	D. Santamaría-Aguilar
J. D. Dwyer	1440		Virola sebifera	Virola sebifera Aubl.	Virola	sebifera	Myristicaceae	Mesoamerica	Panama	Canal Area		Barro Colorado Island	10 - 100 m	10	100	m	09°09'N 079°51'W	9.15	-79.85	1961-08-09	9	8	1961				Tree 75 feet high; buds rusty orange color; bark aromatic.	MO	2018	D. Santamaría-Aguilar
J. H. Howell	25		Virola sebifera	Virola sebifera Aubl.	Virola	sebifera	Myristicaceae	Mesoamerica	Panama	Colón	Chagres	Colectado en Tres Brazos sawmill, Icacal, which is in between Salud y Boca de Río Indio	20 m	20		m	09°11'30"N 080°09'02"W	9.19167	-80.1506	1969-06-24	24	6	1969				Árbol. Nombre común: velario colorado.	MO	2018	D. Santamaría-Aguilar
J. A. Duke	5834		Virola sebifera	Virola sebifera Aubl.	Virola	sebifera	Myristicaceae	Mesoamerica	Panama	Panamá	Chepo	Vicinity of El Llano					09°12'58"N 078°58'30"W	9.21611	-78.975	14 Oct 1962 - 19 Oct 1962	14	10	1962	19	10	1962	Tree 62 feet tall, 13 cm diameter.	MO	2018	D. Santamaría-Aguilar
M. H. Nee	9043		Virola sebifera	Virola sebifera Aubl.	Virola	sebifera	Myristicaceae	Mesoamerica	Panama	Canal Area		Tropical moist forest and roadside along "abandoned" road C29 just N of Las Cruces Trail, 6 km E of Gamboa.	150 m	150		m	09°07'06"N 079°38'29"W	9.11833	-79.6414	1973-12-27	27	12	1973				Small tree 6 m tall; fruit green, covered with brown mealy pubescence which is easily rubbed off.	MO	2018	D. Santamaría-Aguilar
E. L. Tyson	4210		Virola sebifera	Virola sebifera Aubl.	Virola	sebifera	Myristicaceae	Mesoamerica	Panama	Canal Area		Barro Colorado Island	0 - 100 m	0	100	m	09°09'N 079°51'W	9.15	-79.85	1966-06-25	25	6	1966				40 feet tall, 8 inch DBH.	MO	2018	D. Santamaría-Aguilar
E.A. Lao & L. R. Holdridge	53		Virola sebifera	Virola sebifera Aubl.	Virola	sebifera	Myristicaceae	Mesoamerica	Panama	Panamá	Panamá	Rio Indio	200 m	200		m	09°13'51"N 079°10'41"W	9.23083	-79.1781	1971-04-27	27	4	1971				Árbol con dap 20 cm y 10 m de altura.	MO	2018	D. Santamaría-Aguilar
M. V. Hayden	82		Virola sebifera	Virola sebifera Aubl.	Virola	sebifera	Myristicaceae	Mesoamerica	Panama	Canal Area		Barro Colorado Island. Clearing near plant house.				m				1965-07-01		7	1965				Fruit with aril.	MO	2018	D. Santamaría-Aguilar
T. B. Croat	9950		Virola sebifera	Virola sebifera Aubl.	Virola	sebifera	Myristicaceae	Mesoamerica	Panama	Colón		Forested area near Guasimo, along river.					09°07'30"N 080°11'00"W	9.125	-80.1833	1970-04-22	22	4	1970				Tree 15 m; flowers brown.	MO	2018	D. Santamaría-Aguilar
T. B. Croat	5297		Virola sebifera	Virola sebifera Aubl.	Virola	sebifera	Myristicaceae	Mesoamerica	Panama	Canal Area		Barro Colorado Island. Shoreline of N edge of first cove south of #8 Rear Light.	0 - 5 m	0	5	m	09°10'05"N 079°51'25"W	9.16806	-79.8569	1968-05-01	1	5	1968				Tree 10 m.	MO	2018	D. Santamaría-Aguilar
A. G. Robyns	65-55		Virola sebifera	Virola sebifera Aubl.	Virola	sebifera	Myristicaceae	Mesoamerica	Panama	Canal Area		Gamboa; US Navy Reserve.	50 m	50		m	09°07'10"N 079°42'02"W	9.11944	-79.7006	1965-04-01		4	1965				Tree.	MO	2018	D. Santamaría-Aguilar
T. B. Croat	5108		Virola sebifera	Virola sebifera Aubl.	Virola	sebifera	Myristicaceae	Mesoamerica	Panama	Canal Area		Barro Colorado Island. Behind epiphyte house.				m				1968-04-26	26	4	1968				Tree 13 m.	MO	2018	D. Santamaría-Aguilar
M. H. Nee	10532		Virola sebifera	Virola sebifera Aubl.	Virola	sebifera	Myristicaceae	Mesoamerica	Panama	Panamá	Chepo	Along El Llano-Cartí road, 7.5 km N of PanAmerican Hwy. at El Llano	450 m	450		m	09°15'01"N 078°55'59"W	9.25028	-78.9331	1974-03-11	11	3	1974				Tree 8 m tall, 15 cm dbh with annonaceous branching; inflorescence turning orange and pungent fragrant.	MO	2018	D. Santamaría-Aguilar
W. L. Stern, Kenton L. Chambers, J. D. Dwyer & J. E. Ebinger	881		Virola sebifera	Virola sebifera Aubl.	Virola	sebifera	Myristicaceae	Mesoamerica	Panama	Darién		Vicinity of Campamento Buena Vista, Río Chucunaque above confluence with Río Tuquesa					08°23'N 077°47'W	8.38333	-77.7833	1959-07-08	8	7	1959				Tree, 5 inch diameter, 25 feet high. Inflorescence rusty yellow. Bark with reddish sap. Flowers aromatic.	MO	2018	D. Santamaría-Aguilar
J. D. Dwyer	2252		Virola sebifera	Virola sebifera Aubl.	Virola	sebifera	Myristicaceae	Mesoamerica	Panama	Darién		Puerto Santa Dorotea (=Puerto Piñas), near Piñas Bay	0 m	0		m	07°35'N 078°11'W	7.58333	-78.1833	1962-07-21	21	7	1962				Tree 50 feet; inflorescence rusty-orange.	MO	2018	D. Santamaría-Aguilar
T. B. Croat	4275		Virola sebifera	Virola sebifera Aubl.	Virola	sebifera	Myristicaceae	Mesoamerica	Panama	Canal Area		Barro Colorado Island. North of library in lab clearing.	10 - 100 m	10	100	m	09°09'17"N 079°50'53"W	9.15472	-79.8481	1967-12-13	13	12	1967				Tree 15 m; fruit with red aril. Edge of clearing.	MO	2018	D. Santamaría-Aguilar
I. M. Johnston	1602		Virola sebifera	Virola sebifera Aubl.	Virola	sebifera	Myristicaceae	Mesoamerica	Panama	Canal Area		Along Rio Piña - Rio Media divide. Northwestern part of Canal Zone (area west of Limon Bay, Gatun Locks and Gatun Lake.)	100 m	100		m	09°14'05"N 079°57'29"W	9.23472	-79.9581	1955-08-12	12	8	1955				Tree 40 feet tall, cymes brown.	MO	2018	D. Santamaría-Aguilar
T. B. Croat	5996		Virola sebifera	Virola sebifera Aubl.	Virola	sebifera	Myristicaceae	Mesoamerica	Panama	Canal Area		Barro Colorado Island. Edge of clearing (Barbour-Lathrop Trail to dining hall).				m				1968-09-12	12	9	1968				Fruits brown.	MO	2018	D. Santamaría-Aguilar
J. A. Duke	5382		Virola sebifera	Virola sebifera Aubl.	Virola	sebifera	Myristicaceae	Mesoamerica	Panama	Darién		Río Tuira 2 miles upstream from Boca de Cupa.					08°02'N 077°19'W	8.03333	-77.3167	1962-08-04	4	8	1962					MO	2018	D. Santamaría-Aguilar
S. Aviles	11		Virola sebifera	Virola sebifera Aubl.	Virola	sebifera	Myristicaceae	Mesoamerica	Panama	Canal Area		Barro Colorado Island.	10 - 100 m	10	100	m	09°09'N 079°51'W	9.15	-79.85	1931			1931					MO	2018	D. Santamaría-Aguilar
E. L. Tyson, J. D. Dwyer, K. E. Blum & J. A. Duke	4694		Virola sebifera	Virola sebifera Aubl.	Virola	sebifera	Myristicaceae	Mesoamerica	Panama	Darién		3 miles east of Santa Fe.					08°40'N 078°07'W	8.66667	-78.1167	1966-07-16	16	7	1966				Tree 50 feet tall, inflorescence yellow-brown.	MO	2018	D. Santamaría-Aguilar
W. L. Stern & K. L. Chambers	194A		Virola sebifera	Virola sebifera Aubl.	Virola	sebifera	Myristicaceae	Mesoamerica	Panama	Darién		Shore of Bahia de Piñas					07°34'00"N 078°12'30"W	7.56667	-78.2083	1957-06-26	26	6	1957				Tree; inflorescence orange; flowers and leaves aromatic; bark with red sap. "Mancha."	MO	2018	D. Santamaría-Aguilar
T. B. Croat	5366		Virola sebifera	Virola sebifera Aubl.	Virola	sebifera	Myristicaceae	Mesoamerica	Panama	Canal Area		Barro Colorado Island. Eastern side of Peña Blanca Peninsula	0 - 5 m	0	5	m	09°10'10"N 079°52'05"W	9.16944	-79.8681	1968-05-06	6	5	1968				Tree, 10 m.	MO	2018	D. Santamaría-Aguilar
M. H. Nee	8942		Virola sebifera	Virola sebifera Aubl.	Virola	sebifera	Myristicaceae	Mesoamerica	Panama	Canal Area		Vicinity of towers on Loma La Toba, 3 km SW of mouth of Chagres River. Tropical wet forest. Forest with understory disturbed by army activities	25 - 75 m	25	75	m	09°17'52"N 080°00'58"W	9.29778	-80.0161	1973-12-21	21	12	1973				Tree 14 m tall, 25 cm dbh; fruit green with mealy brown pubescence which is readily scraped off. Altitude 60 m.	MO	2018	D. Santamaría-Aguilar
M. H. Nee	10445		Virola sebifera	Virola sebifera Aubl.	Virola	sebifera	Myristicaceae	Mesoamerica	Panama	Canal Area		Along Río Mendosa near Pipeline Road bridge, 8 km NW of Gamboa.	125 m	125		m	09°09'36"N 079°44'44"W	9.16	-79.7456	1974-03-10	10	3	1974				Tree 10 m tall; inflorescence rusty.	MO	2018	D. Santamaría-Aguilar
A. F. Clewell & E. L. Tyson	3293		Virola sebifera	Virola sebifera Aubl.	Virola	sebifera	Myristicaceae	Mesoamerica	Panama	Canal Area		At low elevations along the Pipeline Road near Gamboa.	10 - 50 m	10	50	m	09°07'50"N 079°43'20"W	9.13056	-79.7222	1972-06-26	26	6	1972					MO	2018	D. Santamaría-Aguilar
J. L. Luteyn & R. B. Foster	1547		Virola sebifera	Virola sebifera Aubl.	Virola	sebifera	Myristicaceae	Mesoamerica	Panama	Canal Area		Pipeline Road, north of Gamboa	50 - 100 m	50	100	m	09°10'N 079°46'W	9.16667	-79.7667	1970-07-26	26	7	1970				Tree 5-6 m. Fruit green, tan glaucous.	MO	2018	D. Santamaría-Aguilar
S. A. Mori & J. A. Kallunki	1759		Virola sebifera	Virola sebifera Aubl.	Virola	sebifera	Myristicaceae	Mesoamerica	Panama	Canal Area		At end of Pipeline Road; 15-20 miles NW of Gamboa	0 - 100 m	0	100	m	09°14'38"N 079°48'57"W	9.24389	-79.8158	1974-09-07	7	9	1974				Tree. Flowers covered with rusty pubescence.	MO	2018	D. Santamaría-Aguilar
T. B. Croat	5959		Virola sebifera	Virola sebifera Aubl.	Virola	sebifera	Myristicaceae	Mesoamerica	Panama	Canal Area		Barro Colorado Island.				m				1968-09-12	12	9	1968				Tree, 15 m; fruits brown.	MO	2018	D. Santamaría-Aguilar
T. B. Croat	11731		Virola sebifera	Virola sebifera Aubl.	Virola	sebifera	Myristicaceae	Mesoamerica	Panama	Canal Area		Barro Colorado Island. Gross Peninsula. Large cove on east side	0 - 5 m	0	5	m	09°10'41"N 079°50'37"W	9.17806	-79.8436	1970-08-05	5	8	1970				Tree 8 m; flowers and fruits brown.	MO	2018	D. Santamaría-Aguilar
R.H. Woodworth & P.A. Vestal	645		Virola sebifera	Virola sebifera Aubl.	Virola	sebifera	Myristicaceae	Mesoamerica	Panama	Canal Area		Barro Colorado Island. Shore near Fuertes House.	0 - 10 m	0	10	m	09°10'02"N 079°51'11"W	9.16722	-79.8531	1932-02-21	21	2	1932				Tree; flowers orange-brown.	MO	2018	D. Santamaría-Aguilar
T. B. Croat	4539		Virola sebifera	Virola sebifera Aubl.	Virola	sebifera	Myristicaceae	Mesoamerica	Panama	Canal Area		Barro Colorado Island. Snyder-Molino Trail 290.	10 - 150 m	10	150	m	09°09'30"N 079°50'20"W	9.15833	-79.8389	1967-04-09	9	4	1967				Tree, 10 m.	MO	2018	D. Santamaría-Aguilar
N. Bristan	1381		Virola sebifera	Virola sebifera Aubl.	Virola	sebifera	Myristicaceae	Mesoamerica	Panama	Darién		El Río Yape	24 m	24		m	08°07'N 077°17'W - 08°12'N 077°21'W	8.11667	-77.2833	1967-10-26	26	10	1967				Tree to 10 feet DBH; wood soft; fruits yellow.	MO	2018	D. Santamaría-Aguilar
T. B. Croat	8251		Virola sebifera	Virola sebifera Aubl.	Virola	sebifera	Myristicaceae	Mesoamerica	Panama	Canal Area		Barro Colorado Island. Shoreline of small cove south of Drayton House	0 - 5 m	0	5	m	09°08'29"N 079°50'35"W	9.14139	-79.8431	1969-02-28	28	2	1969				Tree; 8 m; open flowers golden.	MO	2018	D. Santamaría-Aguilar
R. L. Wilbur & R. E. Weaver, Jr.	11269		Virola sebifera	Virola sebifera Aubl.	Virola	sebifera	Myristicaceae	Mesoamerica	Panama	Canal Area		Along the margin of Pipeline Road N of Gamboa.								1970-01-22	22	1	1970				Occasional 8 m tree.	MO	2018	D. Santamaría-Aguilar
T. B. Croat	4610		Virola sebifera	Virola sebifera Aubl.	Virola	sebifera	Myristicaceae	Mesoamerica	Panama	Canal Area		Barro Colorado Island	10 - 100 m	10	100	m	09°09'17"N 079°50'53"W	9.15472	-79.8481	1968-04-10	10	4	1968				Tree 25 m tall.	MO	2018	D. Santamaría-Aguilar
T. B. Croat	8115		Virola sebifera	Virola sebifera Aubl.	Virola	sebifera	Myristicaceae	Mesoamerica	Panama	Canal Area		Barro Colorado Island. Fuertes Cove	0 - 10 m	0	10	m	09°10'02"N 079°51'11"W	9.16722	-79.8531	1969-02-24	24	2	1969				Tree 8 m.	MO	2018	D. Santamaría-Aguilar
T. B. Croat	5757		Virola sebifera	Virola sebifera Aubl.	Virola	sebifera	Myristicaceae	Mesoamerica	Panama	Canal Area		Barro Colorado Island; Frank Drayton Trail	10 - 150 m	10	150	m	09°09'15"N 079°51'05"W	9.15417	-79.8514	1968-05-22	22	5	1968				Tree, 15 m. Frank Drayton Trail 515.	MO	2018	D. Santamaría-Aguilar
I. M. Johnston	1601		Virola sebifera	Virola sebifera Aubl.	Virola	sebifera	Myristicaceae	Mesoamerica	Panama	Canal Area		Along Rio Piña - Rio Media divide. Northwestern part of Canal Zone (area west of Limon Bay, Gatun Locks and Gatun Lake.)	100 m	100		m	09°14'05"N 079°57'29"W	9.23472	-79.9581	1955-08-12	12	8	1955				Tree 40 feet tall, lower surface of leaves brownish, fruit a rich brown.	MO	2018	D. Santamaría-Aguilar
N. Bristan	1063		Virola sebifera	Virola sebifera Aubl.	Virola	sebifera	Myristicaceae	Mesoamerica	Panama	Darién		Between Quebrada Venado and Peje Swamp on the headwaters of Río Tuqueza [Tuquesa].					08°28'N 077°35'W	8.46667	-77.5833	1967-06-28	28	6	1967				Soft wood tree 9 inch DBH; flowers aromatic; fruits brown.	MO	2018	D. Santamaría-Aguilar
W. L. Stern, K. L. Chambers, J.D. Dwyer & J. E. Ebinger	512		Virola sebifera	Virola sebifera Aubl.	Virola	sebifera	Myristicaceae	Mesoamerica	Panama	Darién		Vicinity of Cana.	1750 ft	1750		ft	07°45'N 077°41'W	7.75	-77.6833	1959-06-24	24	6	1959				Tree ca. 60 feet tall, 10 inch DBH; young stem and leaves rufose; flowers highly aromatic.	MO	2018	D. Santamaría-Aguilar
G. C. de Nevers, J. Blake & H. Herrera	5609		Virola sebifera	Virola sebifera Aubl.	Virola	sebifera	Myristicaceae	Mesoamerica	Panama	San Blas		El Llano-Cartí road, Km 19.	350 m	350		m	09°19'N 078°55'W	9.31667	-78.9167	1985-05-06	6	5	1985				Tree 25 m; flowers brown, DBH 32.4 cm. Plot #905.	MO	2018	D. Santamaría-Aguilar
																													2018	D. Santamaría-Aguilar
																													2018	D. Santamaría-Aguilar
																													2018	D. Santamaría-Aguilar
																													2018	D. Santamaría-Aguilar
																													2018	D. Santamaría-Aguilar
																													2018	D. Santamaría-Aguilar
																													2018	D. Santamaría-Aguilar
																													2018	D. Santamaría-Aguilar
																													2018	D. Santamaría-Aguilar
																													2018	D. Santamaría-Aguilar
																													2018	D. Santamaría-Aguilar
																													2018	D. Santamaría-Aguilar
																													2018	D. Santamaría-Aguilar
																													2018	D. Santamaría-Aguilar
																													2018	D. Santamaría-Aguilar
																													2018	D. Santamaría-Aguilar
																													2018	D. Santamaría-Aguilar
																													2018	D. Santamaría-Aguilar
																													2018	D. Santamaría-Aguilar
																				nov. 1927		11	1927						2018	D. Santamaría-Aguilar
																													2018	D. Santamaría-Aguilar
																													2018	D. Santamaría-Aguilar
																													2018	D. Santamaría-Aguilar
																													2018	D. Santamaría-Aguilar
																													2018	D. Santamaría-Aguilar
																													2018	D. Santamaría-Aguilar
